# Supplementary material for: Quantitative proteomics for monitoring microbial dynamics in activated sludge from landfill leachate treatment
Source: Royal Society of Chemistry journal article supplement (doi:10.1039/c8ew00892b), 2019-01-01
Supplement: c8ew00892b1.pdf [file c8ew00892b1.pdf]

**Scientific name**

Candidatus Nitrospira bockiana  
Candidatus Nitrospira inopinata  
Candidatus Nitrospira nitrificans  
Candidatus Nitrospira nitrosa  
Leptospirillum ferriphilum  
Leptospirillum rubarum  
Nitrospira marina  
Nitrospira moscoviensis  
Thermodesulfovibrio islandicus  
Nitrosomonas aestuarii  
Nitrosomonas communis  
Nitrosomonas cryotolerans  
Nitrosomonas cryotolerans ATCC 49181  
Nitrosomonas europaea  
Nitrosomonas europaea (strain ATCC 19718 / CIP 103999 / KCTC 2705 / NBRC 14298)  
Nitrosomonas eutropha  
Nitrosomonas eutropha (strain C91)  
Nitrosomonas halophila  
Nitrosomonas marina  
Nitrosomonas marina C-113a  
Nitrosomonas mobilis  
Nitrosomonas nitrosa  
Nitrosomonas oligotropha  
Nitrosomonas sp.  
Nitrosomonas ureae  
Leptothrix hardyi  
Candidatus Brocadia anammoxidans  
Candidatus Brocadia caroliniensis  
Candidatus Brocadia sinica  
Candidatus Brocadia sinica JPN1  
Nitrobacter alkalicus  
Nitrobacter hamburgensis  
Nitrobacter hamburgensis (strain DSM 10229 / NCIMB 13809 / X14)  
Nitrobacter sp.  
Nitrobacter sp. Yukatan  
Nitrobacter vulgaris  
Nitrobacter winogradskyi  
Nitrobacter winogradskyi (strain ATCC 25391 / DSM 10237 / CIP 104748 / NCIMB 11846 / Nb-255)  
Paracoccus aestuarii  
Paracoccus alcaliphilus  
Paracoccus alkenifer  
Paracoccus aminophilus  
Paracoccus aminophilus JCM 7686  
Paracoccus aminovorans  
Paracoccus contaminans  
Paracoccus denitrificans  
Paracoccus denitrificans (strain Pd 1222)  
Paracoccus ferrooxidans  
Paracoccus haeundaensis

Paracoccus halophilus

Paracoccus homiensis

Paracoccus huijuniae

Paracoccus saliphilus

Paracoccus sanguinis

Paracoccus sediminis

Paracoccus seriniphilus

Paracoccus solventivorans

Paracoccus sp.

Paracoccus sp. SSG05

Paracoccus stylophorae

Paracoccus thiocyanatus

Paracoccus tibetensis

Paracoccus versutus

Paracoccus yeei

Paracoccus zeaxanthinifaciens

Paracoccus zhejiangensis

Pseudomonas denitrificans
