# Supplementary material for: Quantitative proteomics for monitoring microbial dynamics in activated sludge from landfill leachate treatment
Source: Royal Society of Chemistry journal article supplement (doi:10.1039/c8ew00892b), 2019-01-01
Supplement: c8ew00892b2.pdf [file c8ew00892b2.pdf]

| iBAQ_1_01 | iBAQ_1_02 | iBAQ_1_03 | iBAQ_1_04 | iBAQ_1_05 | iBAQ_4_01 | iBAQ_4_02 | iBAQ_4_03 | iBAQ_4_04 | iBAQ_4_05                       | Fasta                           | OS                                   | Protein                                       | Q-value   | Score    | Intensity | MS/MS Count | Peptides | Razor + unique pept. | Unique peptides | Number of proteins | Sequence coverage | Mol. weight [kDa]            | protein IDs                     | Majority protein IDs             | id    | log2 ratio | t.test  |
|-----------|-----------|-----------|-----------|-----------|-----------|-----------|-----------|-----------|---------------------------------|---------------------------------|--------------------------------------|-----------------------------------------------|-----------|----------|-----------|-------------|----------|----------------------|-----------------|--------------------|-------------------|------------------------------|---------------------------------|----------------------------------|-------|------------|---------|
| 1.70E+06  | 2.29E+06  | 2.28E+06  | 1.85E+06  | 1.00E+00  | 4.13E+05  | 2.42E+05  | 2.80E+05  | 3.85E+05  | 5.35E+05                        | >tr A0A099G7H8 A0A099G7H8_9RHOB | Paracoccus sanguinis                 | 2-isopropylmalate synthase                    | 0         | 8,3775   | 6.91E+07  | 6           | 1        | 1                    | 1               | 16                 | 3.5               | 56,191                       | A0A099G7H8;A0A238X8S7;A0A1H     | A0A099G7H8;A0A238X8S7;A0A1H5YV2  | 0     | -1.21      | 0.00010 |
| 1.85E+06  | 1.95E+06  | 1.62E+06  | 1.42E+06  | 1.73E+06  | 3.05E+05  | 3.05E+05  | 3.05E+05  | 3.05E+05  | 3.05E+05                        | >tr A0A1G5GDR1 A0A1G5GDR1_9RHOB | Paracoccus tibetensis                | TRAP-type manitol/chloroaromatic compou       | 0         | 12,736   | 6.08E+07  | 6           | 1        | 1                    | 1               | 3                  | 5.3               | 39,661                       | A0A1G5GDR1;A0A1G7GGG5;A0A0      | A0A1G5GDR1;A0A1G7GGG5;A0A099E    | 1     | 3.84       | 0.34674 |
| 2.12E+08  | 2.20E+08  | 1.77E+08  | 1.77E+08  | 1.66E+08  | 4.03E+05  | 4.31E+05  | 3.36E+05  | 3.85E+05  | 5.61E+05                        | >tr Q9F0P2 Q9F0P2_PARDE         | Paracoccus denitrificans             | S(-)-beta-hydroxybutyryl CoA dehydrogenase    | 0.0083612 | 5,9068   | 5.20E+07  | 4           | 1        | 1                    | 1               | 15                 | 5.2               | 31,918                       | Q9F0P2;A1B545;A0A238UMU8;A0     | A0Q9F0P2;A1B545;A0A238UMU8;A0A1X | 2     | -0.41      | 0.00000 |
| 9.85E+07  | 1.07E+08  | 9.28E+07  | 1.24E+08  | 7.12E+07  | 5.18E+05  | 6.04E+05  | 1.49E+05  | 0.00E+00  | 2.34E+05                        | >tr A0A0D6T8P5 A0A0D6T8P5_9RHOB | Paracoccus sp. 228                   | Catalase                                      | 0         | 6,2834   | 5.08E+07  | 2           | 1        | 1                    | 1               | 6                  | 3.1               | 55,062                       | A0A0D6T8P5;Q1QPY3;A0A1N6W1U     | A0A0D6T8P5;Q1QPY3;A0A1N6W1U;A0A  | 3     | -1.09      | 0.02906 |
| 7.06E+07  | 7.80E+07  | 7.76E+07  | 1.03E+08  | 4.33E+07  | 0.00E+00  | 6.05E+04  | 0.00E+00  | 4.20E+04  | 0.00E+00                        | >tr A0A1X7LEU8 A0A1X7LEU8_9RHOB | Paracoccus sp. J56                   | Chaperone protein ClpB                        | 0         | 14,216   | 2.65E+07  | 6           | 2        | 1                    | 1               | 51                 | 4                 | 95,707                       | A0A1X7LEU8;A0A2A2GI38;A0A1G     | A0A1X7LEU8;A0A2A2GI38;A0A1G9M6   | 4     | 1.99       | #ZAH!   |
| 2.97E+07  | 3.73E+07  | 3.53E+07  | 3.46E+07  | 3.64E+07  | 3.66E+04  | 0.00E+00  | 0.00E+00  | 0.00E+00  | 0.00E+00                        | >tr A0A1N7KVF7 A0A1N7KVF7_9RHOB | Paracoccus saliphilus                | Fructose-bisphosphate aldolase                | 0.0068966 | 5.98     | 3.45E+07  | 1           | 1        | 1                    | 1               | 25                 | 3.6               | 32,617                       | A0A1N7KVF7;A0A2H5EWTS;A0A2      | A0A1N7KVF7;A0A2H5EWTS;A0A2E3C    | 5     | 5.95       | #ZAH!   |
| 6.37E+07  | 6.79E+07  | 6.21E+07  | 4.45E+07  | 3.77E+07  | 1.18E+06  | 1.24E+06  | 2.71E+05  | 0.00E+00  | 7.07E+05                        | >tr A1BAE3 A1BAE3_PARDP         | Paracoccus denitrificans (strain Pd  | Phosphoglucutamate+phosphomannomutase         | 0         | 6,9005   | 2.32E+08  | 9           | 1        | 1                    | 1               | 22                 | 2.2               | 57,236                       | A1BAE3;A0A2H5F2B3;A0A1X7JH6     | A1BAE3;A0A2H5F2B3;A0A1X7JH6;A0   | 6     | 0.35       | 0.02395 |
| 2.97E+07  | 4.29E+07  | 4.06E+07  | 3.49E+07  | 2.03E+07  | 3.10E+05  | 3.68E+05  | 1.05E+05  | 0.00E+00  | 1.05E+05                        | >tr A0A099F0Z1 A0A099F0Z1_9RHOB | Paracoccus halophilus                | Nitrous-oxide reductase                       | 0         | 11,933   | 4.84E+07  | 6           | 1        | 1                    | 1               | 3                  | 3.3               | 70,349                       | A0A099F0Z1                      | A0A099F0Z1                       | 7     | 0.55       | #ZAH!   |
| 1.77E+06  | 2.50E+06  | 1.95E+06  | 2.17E+06  | 1.48E+06  | 0.00E+00  | 1.65E+06  | 1.15E+06  | 1.43E+06  | 1.53E+06                        | >tr A0A0C9Q3D7 A0A0C9Q3D7_9BACT | Candidatus Brocadia sinica JPN1      | ATP-dependent Clp protease ATP-binding sub    | 0         | 7,5307   | 3.40E+08  | 8           | 1        | 1                    | 1               | 85                 | 3.5               | 41,193                       | A0A0C9Q3D7;A3WZB4;A0A177QJ      | A0A0C9Q3D7;A3WZB4;A0A177QJ;A0A   | 8     | 1.08       | #ZAH!   |
| 9.00E+05  | 9.88E+05  | 9.51E+05  | 7.30E+05  | 9.13E+05  | 5.21E+05  | 6.07E+05  | 4.99E+05  | 6.48E+05  | 7.95E+05                        | >tr SSXZ67 SSXZ67_PARAH         | Paracoccus aminophilus JCM 7686      | Alanine racemase                              | 0         | 11,284   | 7.78E+07  | 1           | 1        | 1                    | 1               | 13                 | 2.3               | 41,812                       | SSXZ67;A0A2H5EVV5;A0A2D2C3C     | SSXZ67;A0A2H5EVV5;A0A2D2C3C;A0   | 9     | -1.58      | 0.00000 |
| 6.42E+06  | 7.90E+06  | 6.92E+06  | 8.69E+06  | 4.89E+06  | 0.00E+00  | 6.13E+05  | 1.32E+06  | 1.48E+06  | 5.53E+05                        | >tr SSXKS6 SSXKS6_PARAH         | Paracoccus aminophilus JCM 7686      | Glyceraldehyde-3-phosphate dehydrogenase      | 0         | 6,5647   | 1.42E+08  | 6           | 1        | 1                    | 1               | 31                 | 4.5               | 35,873                       | SSXKS6;Q9X7H5;A1BAI5;A0A2G1Z    | SSXKS6;Q9X7H5;A1BAI5;A0A2G1ZV9   | 10    | -0.18      | #ZAH!   |
| 3.65E+07  | 4.77E+07  | 0.00E+00  | 4.84E+07  | 0.00E+00  | 6.31E+05  | 5.28E+05  | 0.00E+00  | 0.00E+00  | 0.00E+00                        | >tr A0A099F3C6 A0A099F3C6_9RHOB | Paracoccus halophilus                | Phosphoribosylaminimidazole-succinocarbo      | 0.0069085 | 5,9849   | 5.37E+05  | 5           | 1        | 1                    | 1               | 4                  | 4.3               | 28,646                       | A0A099F3C6                      | A0A099F3C6                       | 11    | 1.52       | #ZAH!   |
| 2.21E+06  | 2.39E+06  | 1.48E+06  | 3.02E+06  | 1.54E+06  | 0.00E+00  | 1.34E+06  | 1.21E+06  | 1.34E+06  | 1.34E+06                        | >tr A0A2G1Z1T8 A0A2G1Z1T8_9RHOB | Paracoccus sp.                       | Phosphoenolpyruvate carboxykinase (ATP)       | 0         | 8,7974   | 9.35E+07  | 1           | 1        | 1                    | 1               | 28                 | 1.7               | 58,148                       | A0A2G1Z1T8;A0A2E3CHV8;A0A2D     | A0A2G1Z1T8;A0A2E3CHV8;A0A2D8W    | 12    | #ZAH!      | #ZAH!   |
| 2.53E+06  | 1.94E+06  | 2.42E+06  | 4.29E+06  | 1.76E+06  | 1.85E+05  | 1.88E+05  | 1.96E+05  | 2.60E+05  | 4.40E+05                        | >tr SSYR51 SSYR51_PARAH         | Paracoccus aminophilus JCM 7686      | Acetyl-CoA C-acetyltransferase                | 0         | 11,08    | 2.49E+07  | 6           | 1        | 1                    | 1               | 28                 | 4.5               | 42,136                       | SSYR51;A1B610;A0A2H5EYQ2;A0A    | SSYR51;A1B610;A0A2H5EYQ2;A0A2D2  | 13    | -3.47      | #ZAH!   |
| 0.00E+00  | 3.05E+06  | 5.18E+06  | 3.03E+06  | 1.30E+06  | 3.67E+07  | 2.66E+07  | 1.06E+07  | 1.74E+07  | 1.79E+07                        | >tr A0A1Q3K2W6 A0A1Q3K2W6_9BRAD | Nitrobacter sp. 62-13                | 30S ribosomal protein S7                      | 0         | 49,068   | 1.07E+09  | 12          | 1        | 1                    | 1               | 37                 | 10.3              | 14,161                       | A0A1Q3K2W6;A0A1M3CB42;SSYU      | A0A1Q3K2W6;A0A1M3CB42;SSYUHY7    | 15    | -0.06      | 0.00126 |
| 3.39E+06  | 4.36E+06  | 3.58E+06  | 4.59E+06  | 2.33E+06  | 2.73E+07  | 2.73E+07  | 1.15E+07  | 2.45E+07  | 7.08E+06                        | >tr SSXY54 SSXY54_PARAH         | Paracoccus aminophilus JCM 7686      | 30S ribosomal protein S10                     | 0         | 16,491   | 8.08E+08  | 37          | 1        | 1                    | 1               | 33                 | 16.7              | 11,627                       | SSXY54;Q3SSW7;Q1QN31;A3WVR      | SSXY54;Q3SSW7;Q1QN31;A3WVR9;A    | 16    | -0.62      | 0.00187 |
| 1.36E+06  | 8.23E+05  | 4.86E+05  | 1.34E+06  | 7.62E+05  | 0.00E+00  | 0.00E+00  | 0.00E+00  | 0.00E+00  | 0.00E+00                        | >tr A3WSHO A3WSHO_9BRAD         | Nitrobacter sp. Nb-311A              | Dihydroxy-acid dehydratase                    | 0         | 9,2967   | 3.16E+07  | 4           | 1        | 1                    | 1               | 31                 | 2.7               | 63,891                       | A3WSHO;SSYFZ1;A1B673;A0A2H5     | A3WSHO;SSYFZ1;A1B673;A0A2H5F014  | 17    | #ZAH!      | #ZAH!   |
| 2.21E+07  | 2.61E+07  | 2.30E+07  | 2.01E+07  | 1.81E+07  | 2.16E+05  | 2.91E+05  | 7.56E+03  | 1.27E+05  | 2.44E+05                        | >tr SSY3C4 SSY3C4_PARAH         | Paracoccus aminophilus JCM 7686      | Elongation factor G                           | 0         | 11,936   | 4.95E+07  | 7           | 1        | 1                    | 1               | 32                 | 2.4               | 78,336                       | SSY3C4;A1B023;A0A2H5EYB6;A0A    | SSY3C4;A1B023;A0A2H5EYB6;A0A2G1  | 19    | -1.09      | 0.00770 |
| 4.69E+04  | 7.83E+04  | 3.93E+04  | 5.79E+04  | 0.00E+00  | 1.55E+06  | 6.81E+05  | 1.23E+06  | 0.00E+00  | 1.89E+06                        | >tr A0A2H5EYU2 A0A2H5EYU2_9RHOB | Paracoccus zhejiangensis             | 30S ribosomal protein S5                      | 0         | 8,0373   | 8.12E+07  | 4           | 1        | 1                    | 1               | 19                 | 6.4               | 20,403                       | A0A2H5EYU2;A0A1I7KGG1;A0A1H     | A0A2H5EYU2;A0A1I7KGG1;A0A1I2K8   | 21    | -0.94      | #ZAH!   |
| 5.18E+04  | 0.00E+00  | 0.00E+00  | 0.00E+00  | 0.00E+00  | 1.16E+06  | 1.37E+06  | 5.74E+05  | 0.00E+00  | 9.64E+05                        | >tr A0A099F7V4 A0A099F7V4_9RHOB | Paracoccus halophilus                | UF0F173 metal-dependent hydrolase ITA1_0      | 0         | 6,1117   | 4.85E+07  | 4           | 1        | 1                    | 1               | 3                  | 5.7               | 25,156                       | A0A099F7V4                      | A0A099F7V4                       | 22    | -1.62      | #ZAH!   |
| 1.06E+06  | 1.85E+06  | 1.48E+06  | 1.09E+06  | 7.12E+05  | 7.22E+06  | 1.84E+06  | 6.34E+06  | 5.68E+06  | 1.68E+06                        | >tr A0A1K2F7M8 A0A1K2F7M8_PARP  | Paracoccus pantotrophus              | 10 kDa chaperonin                             | 0.0097879 | 5,8616   | 3.85E+08  | 3           | 1        | 1                    | 1               | 1                  | 11.5              | 11,226                       | A0A1K2F7M8;A0A1I5ML22;A0A09     | A0A1K2F7M8;A0A1I5ML22;A0A099F8   | 23    | 0.25       | 0.00069 |
| 1.80E+07  | 2.09E+07  | 1.12E+07  | 1.10E+07  | 9.99E+06  | 3.78E+05  | 0.00E+00  | 0.00E+00  | 0.00E+00  | 3.85E+05                        | >tr B1Y6G8 B1Y6G8_LEPFC         | Leptothrix chlodnii (strain ATCC     | Electron transfer flavoprotein alpha subunit  | 0         | 17,443   | 9.17E+07  | 6           | 1        | 1                    | 1               | 7                  | 6.2               | 31,176                       | B1Y6G8;B1Y4M5;B1Y4F2;B1Y1V0     | B1Y6G8;B1Y4M5;B1Y4F2;B1Y1V0;A0A  | 24    | 2.81       | 0.14118 |
| 9.70E+05  | 1.42E+06  | 1.35E+06  | 7.95E+05  | 1.33E+06  | 1.23E+05  | 1.66E+05  | 0.00E+00  | 8.16E+04  | 6.59E+04                        | >tr A0A1M7F358 A0A1M7F358_9RHOB | Paracoccus solventivorans            | Formate-tetrahydrofolate ligase               | 0         | 6,5471   | 2.57E+07  | 1           | 1        | 1                    | 1               | 18                 | 2.9               | 58,764                       | A0A1M7F358;A0A1H6NCA0;A0A0      | A0A1M7F358;A0A1H6NCA0;A0A0D6T    | 25    | -0.05      | #ZAH!   |
| 1.60E+07  | 1.76E+07  | 1.27E+07  | 8.82E+06  | 9.02E+06  | 1.03E+06  | 4.12E+06  | 2.22E+06  | 0.00E+00  | >tr SSXY41 SSXY41_PARAH         | Paracoccus aminophilus JCM 7686 | 30S ribosomal protein S8             | 0.0068259                                     | 5,9382    | 3.10E+08 | 6         | 1           | 1        | 1                    | 17              | 9.1                | 14,424            | SSXY41;A1B041;A0A2AGJ86;A0A1 | SSXY41;A1B041;A0A2AGJ86;A0A2A39 | 26                               | 0.77  | 0.07327    |         |
| 1.12E+08  | 1.22E+08  | 1.23E+08  | 1.09E+08  | 7.41E+07  | 0.00E+00  | 1.26E+06  | 0.00E+00  | 0.00E+00  | 0.00E+00                        | >tr A0A1G7EAL5 A0A1G7EAL5_9RHOB | Paracoccus isopora                   | Glycine betaine/proline transport system sub  | 0.0069324 | 5,9859   | 3.55E+07  | 2           | 1        | 1                    | 1               | 23                 | 3.9               | 32,71                        | A0A1G7EAL5;A0A2A2GN92;A0A1      | A0A1G7EAL5;A0A2A2GN92;A0A1W6D    | 27    | 1.88       | #ZAH!   |
| 6.21E+06  | 8.21E+06  | 8.18E+06  | 3.45E+06  | 3.84E+06  | 6.48E+05  | 7.47E+05  | 5.80E+05  | 7.37E+05  | >tr A0A1G7AD93 A0A1G7AD93_9RHOB | Paracoccus isopora              | GMP synthase [glutamine-hydrolyzing] | 0.0071301                                     | 6,0204    | 9.34E+07 | 2         | 1           | 1        | 1                    | 11              | 3.1                | 57,163            | A0A1G7AD93;A0A2E3CFG5;A0A2   | A0A1G7AD93;A0A2E3CFG5;A0A2D2C   | 28                               | -6.14 | #ZAH!      |         |
| 0.00E+00  | 0.00E+00  | 0.00E+00  | 0.00E+00  | 0.00E+00  | 5.88E+05  | 6.89E+05  | 4.35E+05  | 5.19E+05  | 6.39E+05                        | >tr A0A099G4W7 A0A099G4W7_9RHOB | Paracoccus sanguinis                 | Amino acid ABC transporter substrate-binding  | 0         | 6,8859   | 4.31E+07  | 3           | 1        | 1                    | 1               | 9                  | 6.6               | 28,182                       | A0A099G4W7;A0A099FGF3;SSXU      | A0A099G4W7;A0A099FGF3;SSXU9;A    | 30    | #ZAH!      | #ZAH!   |
| 1.28E+06  | 1.00E+06  | 4.01E+05  | 1.02E+06  | 1.88E+06  | 6.82E+05  | 6.67E+05  | 3.07E+05  | 0.00E+00  | 0.00E+00                        | >tr Q93PW0 Q93PW0_PARP          | Paracoccus pantotrophus              | Large subunit of nitrate reductase NarG (Frag | 0         | 14,621   | 4.17E+07  | 2           | 1        | 1                    | 1               | 18                 | 4.3               | 40,166                       | Q93PW0;A0A1M7HH15;A0A1H6M       | Q93PW0;A0A1M7HH15;A0A1H6MU12     | 30    | -1.06      | #ZAH!   |
| 0.00E+00  | 5.18E+05                        | >tr A0A239Q312 A0A239Q312_9RHOB | Paracoccus seriniphilus              | Electron transfer flavoprotein beta subunit   | 0.0082372 | 5,8827   | 6.73E+06  | 0           | 1        | 1                    | 1               | 2                  | 5.6               | 26,509                       | A0A239Q312;A0A099FHK9           | A0A239Q312;A0A099FHK9            | 31    | #ZAH!      | #ZAH!   |
| 1.79E+05  | 9.91E+04  | 0.00E+00  | 3.03E+05  | 4.55E+04  | 0.00E+00  | 4.50E+05  | 2.99E+05  | 3.12E+05  | 0.00E+00                        | >tr SSYUY2 SSYUY2_PARAH         | Paracoccus aminophilus JCM 7686      | Propionyl-CoA carboxylase beta chain          | 0         | 11,465   | 9.36E+07  | 5           | 2        | 1                    | 1               | 30                 | 6.1               | 56,186                       | SSYUY2;A1B8B1;A0A2H5EV73;A0A    | SSYUY2;A1B8B1;A0A2H5EV73;A0A2G   | 32    | 1.42       | 0.04720 |
| 1.95E+06  | 2.48E+06  | 2.19E+06  | 1.95E+06  | 8.94E+05  | 8.10E+04  | 6.30E+04  | 0.00E+00  | 8.49E+05  | 7.55E+05                        | >tr A1BAF9 A1BAF9_PARDP         | Paracoccus denitrificans (strain Pd  | Carbohydrate ABC transporter ATP-binding pr   | 0         | 22,774   | 2.97E+07  | 3           | 1        | 1                    | 1               | 12                 | 4.8               | 36,827                       | A1BAF9;A0A1K2B5Z5;A0A1I5D735    | A1BAF9;A0A1K2B5Z5;A0A1I5D735;A0  | 33    | -3.98      | #ZAH!   |
| 3.78E+05  | 4.07E+05  | 3.48E+05  | 3.14E+05  | 2.77E+05  | 2.19E+06  | 2.18E+06  | 1.45E+06  | 1.62E+06  | 1.32E+06                        | >tr A1B0W7 A1B0W7_PARDP         | Paracoccus denitrificans (strain Pd  | Carbohydrate ABC transporter ATP-binding pr   | 0         | 6,5144   | 1.50E+08  | 5           | 1        | 1                    | 1               | 4                  | 3.9               | 38,992                       | A1B0W7;A0A1K2EYK9;A0A0V0PZ1     | A1B0W7;A0A1K2EYK9;A0A0V0PZ1;A0   | 34    | -7.77      | #ZAH!   |
| 5.56E+04  | 1.62E+05  | 1.05E+05  | 2.95E+04  | 1.66E+05  | 0.00E+00  | 0.00E+00  | 0.23E+05  | 2.40E+05  | 1.94E+05                        | >tr A0A0V0PZB0 A0A0V0PZB0_9RHOB | Paracoccus sp. MKU1                  | Uncharacterized protein (Fragment)            | 0         | 6,3456   | 4.66E+06  | 1           | 1        | 1                    | 1               | 8                  | 8.8               | 22,988                       | A0A0V0PZB0;A0A1D2BZ16;A0A1X     | A0A0V0PZB0;A0A1D2BZ16;A0A1X7J08  | 35    | #ZAH!      | #ZAH!   |
| 1.60E+07  | 2.01E+07  | 1.40E+07  | 2.25E+07  | 0.00E+00  | 4.90E+05  | 4.57E+05  | 1.83E+05  | 0.00E+00  | 0.00E+00                        | >ss A1B0S0 RS13_PARDP           | Paracoccus denitrificans (strain Pd  | 30S ribosomal protein S13                     | 0         | 6,1387   | 4.21E+07  | 4           | 1        | 1                    | 1               | 6                  | 10.7              | 13,61                        | A1B0S0;A0A1N7N3C3;A0A1M7J3A     | A1B0S0;A0A1N7N3C3;A0A1M7J3A4;A   | 36    | 2.1        |         |

|          |          |          |          |          |          |          |          |          |          |                                 |                                   |                                                |           |        |          |    |   |   |   |      |        |                             |                                |                                 |       |         |         |
|----------|----------|----------|----------|----------|----------|----------|----------|----------|----------|---------------------------------|-----------------------------------|------------------------------------------------|-----------|--------|----------|----|---|---|---|------|--------|-----------------------------|--------------------------------|---------------------------------|-------|---------|---------|
| 1.31e+06 | 8.86e+05 | 1.65e+05 | 6.10e+05 | 3.77e+05 | 1.61e+06 | 1.34e+06 | 5.78e+05 | 1.06e+06 | 1.21e+06 | >tr A0A0M2UYH7 A0A0M2UYH7_9BACT | Candidatus Brocadia fulgida       | ATPase                                         | 0         | 11,831 | 1.96e+08 | 4  | 1 | 1 | 1 | 1    | 3.6    | 37,584                      | A0A0M2UYH7                     | A0A0M2UYH7                      | 127   | 0.50    | #ZAH!   |
| 1.71e+06 | 3.10e+06 | 3.77e+05 | 1.42e+06 | 2.35e+05 | 4.00e+05 | 5.08e+05 | 3.21e+05 | 0.00e+00 | 4.33e+05 | >tr A0A1V4AXP1 A0A1V4AXP1_9BACT | Candidatus Brocadia carolinensis  | 2-dehydro-3-deoxyphosphoactonate aldolase      | 0         | 9,9393 | 8.84e+07 | 4  | 1 | 1 | 1 | 3    | 5.2    | 29,891                      | A0A1V4AXP1;A0A1V6MQQ9;A0A0     | A0A1V4AXP1;A0A1V6MQQ9;A0A0M2U   | 128   | 2.76    | 0.04642 |
| 0.00e+00 | 0.00e+00 | 0.00e+00 | 0.00e+00 | 0.00e+00 | 0.00e+00 | 0.21e+05 | 5.22e+05 | 3.64e+05 | 3.14e+05 | >tr F92EE9 F92EE9_9PROT         | Nitrosomonas sp. AL212            | Lysine--tRNA ligase                            | 0         | 20,375 | 1.66e+08 | 8  | 1 | 1 | 1 | 17   | 3.6    | 57,583                      | F92EE9;A0A286AS53;A0A285BYR5   | F92EE9;A0A286AS53;A0A285BYR5;A0 | 130   | 1.17    | 0.00002 |
| 0.00e+00 | 0.00e+00 | 0.00e+00 | 0.00e+00 | 0.00e+00 | 1.37e+07 | 1.53e+07 | 3.20e+06 | 4.00e+05 | 1.66e+07 | >tr F92E90 F92E90_9PROT         | Nitrosomonas sp. AL212            | Cold-shock DNA-binding domain protein          | 0         | 8,1127 | 1.69e+09 | 10 | 1 | 1 | 1 | 10   | 14.9   | 7,218                       | F92E90;F8GFU9;A0A1N6F07;A0A1   | F92E90;F8GFU9;A0A1N6F07;A0A14C  | 131   | 2.92    | 0.01864 |
| 7.88e+05 | 7.95e+05 | 1.26e+06 | 9.08e+05 | 1.14e+06 | 2.14e+06 | 1.83e+06 | 1.82e+06 | 0.00e+00 | 2.86e+06 | >tr F92D19 F92D19_9PROT         | Nitrosomonas sp. AL212            | Ribulose-phosphate 3-epimerase                 | 0         | 6,7162 | 3.76e+08 | 5  | 1 | 1 | 1 | 5    | 5.3    | 24,334                      | F92D19;A0A286ASV4;A0A1H8ZPD4   | F92D19;A0A286ASV4;A0A1H8ZPD4;A0 | 132   | 1.74    | 0.00638 |
| 1.22e+06 | 1.05e+06 | 6.76e+05 | 1.79e+06 | 7.99e+05 | 0.00e+00 | 2.98e+05 | 0.00e+00 | 0.00e+00 | 0.00e+00 | >tr A0A286ASB8 A0A286ASB8_9PROT | Nitrosomonas ureae                | Acyl carrier protein                           | 0         | 7,5407 | 8.00e+07 | 4  | 1 | 1 | 1 | 2    | 17.5   | 8,9038                      | A0A286ASB8;A0A053AGN4          | A0A286ASB8;A0A053AGN4           | 133   | 5.72    | 0.34676 |
| 7.43e+06 | 7.74e+06 | 5.22e+06 | 7.49e+06 | 6.51e+06 | 2.32e+06 | 2.25e+06 | 1.94e+06 | 2.10e+06 | 2.97e+06 | >tr F92IM9 F92IM9_9PROT         | Nitrosomonas sp. AL212            | Glutamate dehydrogenase                        | 0         | 279.8  | 7.52e+08 | 41 | 1 | 1 | 1 | 7    | 4.5    | 48,526                      | F92IM9;F8GLW9;A0A285C053;A0A   | F92IM9;F8GLW9;A0A285C053;A0A111 | 136   | 0.49    | 0.00000 |
| 1.30e+07 | 2.04e+07 | 1.23e+07 | 9.24e+06 | 1.46e+07 | 0.00e+00 | 0.00e+00 | 0.00e+00 | 8.92e+04 | 0.00e+00 | >tr F92G12 F92G12_9PROT         | Nitrosomonas sp. AL212            | O-acetylhomoserine/O-acetylserine sulfhydry    | 0,0083893 | 5,9087 | 2.36e+07 | 1  | 1 | 1 | 1 | 6    | 2.8    | 45,706                      | F92G12;A0A286A1F6;A0A1H98560   | F92G12;A0A286A1F6;A0A1H98560;A0 | 138   | 3.53    | #ZAH!   |
| 0.00e+00 | 0.00e+00 | 0.00e+00 | 0.00e+00 | 0.00e+00 | 2.47e+06 | 3.99e+06 | 4.95e+06 | 3.78e+06 | 5.45e+06 | >tr F92GW2 F92GW2_9PROT         | Nitrosomonas sp. AL212            | 30S ribosomal protein S8                       | 0         | 8,2672 | 5.82e+08 | 11 | 1 | 1 | 1 | 13   | 9.2    | 14,48                       | F92GW2;F8GHL8;B1Y8C3;A0A286A   | F92GW2;F8GHL8;B1Y8C3;A0A286AH3  | 139   | 1.34    | 0.00004 |
| 1.73e+06 | 1.98e+06 | 1.69e+05 | 1.44e+06 | 6.07e+05 | 6.40e+06 | 6.36e+06 | 6.51e+06 | 5.00e+06 | 9.15e+06 | >tr A0A17F7D8 A0A17F7D8_9PROT   | Nitrosomonas eutropha             | Acetolactate synthase, small subunit           | 0         | 56,493 | 4.67e+08 | 11 | 1 | 1 | 1 | 21   | 12.3   | 17,315                      | A0A17F7D8;A0A14KYZ7;A0A13YV    | A0A17F7D8;A0A14KYZ7;A0A13YV61   | 140   | -1.33   | 0.00001 |
| 1.57e+07 | 1.00e+07 | 7.79e+06 | 9.58e+06 | 7.45e+06 | 3.99e+05 | 0.00e+00 | 0.00e+00 | 0.00e+00 | 0.00e+00 | >tr A0A1H8LG13 A0A1H8LG13_9PROT | Nitrosomonas oligotropha          | 50S ribosomal protein L11                      | 0,0083333 | 5,9041 | 4.19e+07 | 3  | 1 | 1 | 1 | 3    | 9.8    | 14,999                      | A0A1H8LG13;A0A1H5Y494;A0A0S5   | A0A1H8LG13;A0A1H5Y494;A0A0S3AK  | 141   | 3.10    | 0.34670 |
| 4.25e+06 | 4.49e+06 | 3.92e+06 | 4.44e+06 | 2.21e+06 | 5.81e+05 | 2.87e+05 | 4.66e+05 | 3.65e+05 | 7.76e+05 | >tr F92D08 F92D08_9PROT         | Nitrosomonas sp. AL212            | Urease subunit alpha                           | 0         | 6,2796 | 1.37e+08 | 4  | 1 | 1 | 1 | 6    | 2.5    | 61,58                       | F92D08;A0A285BW55;A0A14P9H4    | F92D08;A0A285BW55;A0A14P9H4;A0  | 142   | 0.60    | 0.00042 |
| 2.47e+07 | 2.51e+07 | 1.04e+07 | 2.51e+07 | 1.57e+07 | 3.44e+05 | 2.38e+05 | 0.00e+00 | 2.65e+05 | 2.70e+05 | >tr F92E18 F92E18_9PROT         | Nitrosomonas sp. AL212            | Glutamine synthetase                           | 0         | 8,3765 | 4.19e+07 | 6  | 1 | 1 | 1 | 9    | 3.8    | 51,639                      | F92E18;F8GE25;A0A286ABZ4;A0A2  | F92E18;F8GE25;A0A286ABZ4;A0A285 | 143   | -0.83   | #ZAH!   |
| 0.00e+00 | 0.00e+00 | 0.00e+00 | 0.00e+00 | 0.00e+00 | 7.21e+04 | 9.19e+04 | 0.00e+00 | 1.34e+05 | 2.73e+05 | >tr F92EY5 F92EY5_9PROT         | Nitrosomonas sp. AL212            | GMP synthase [glutamine-hydrolyzing]           | 0         | 7,7552 | 4.36e+07 | 4  | 1 | 1 | 1 | 7    | 3.5    | 57,861                      | F92EY5;F8GG22;A0A285BVNO;A0A   | F92EY5;F8GG22;A0A285BVNO;A0A114 | 144   | 1.04    | 0.03569 |
| 2.16e+06 | 2.26e+06 | 1.60e+06 | 1.50e+06 | 1.69e+06 | 0.00e+00 | 0.00e+00 | 1.20e+06 | 0.00e+00 | 0.00e+00 | >tr F92HV3 F92HV3_9PROT         | Nitrosomonas sp. AL212            | Arginine--tRNA ligase                          | 0         | 6,1387 | 3.71e+07 | 1  | 1 | 1 | 1 | 4    | 3.1    | 66,168                      | F92HV3;A0A285BV05;A0A1H9D1L    | F92HV3;A0A285BV05;A0A1H9D1L;A0  | 145   | #ZAH!   | #ZAH!   |
| 1.49e+05 | 1.70e+05 | 5.87e+05 | 7.42e+05 | 7.54e+05 | 0.00e+00 | 0.00e+00 | 0.00e+00 | 0.00e+00 | 0.00e+00 | >tr A0A053AN88 A0A053AN88_9PROT | Nitrosomonas ureae                | Urease subunit beta                            | 0         | 6,4551 | 7.03e+07 | 1  | 1 | 1 | 1 | 6    | 10.8   | 11,352                      | A0A053AN88;A0A14P9M6;A0A112D   | A0A053AN88;A0A14P9M6;A0A112DR   | 146   | #ZAH!   | 0.00000 |
| 2.00e+06 | 2.06e+06 | 1.65e+06 | 2.48e+06 | 0.00e+00 | 1.07e+07 | 8.50e+06 | 0.00e+00 | 1.16e+06 | 9.93e+06 | >tr A0A054KND2 A0A054KND2_9BACT | Candidatus Nitrospira inopinata   | Malate dehydrogenase                           | 0         | 12.9   | 3.17e+09 | 14 | 2 | 1 | 1 | 1    | 9.4    | 36,228                      | A0A054KND2                     | A0A054KND2                      | 148   | 2.47    | #ZAH!   |
| 2.85e+06 | 3.32e+06 | 2.60e+06 | 0.00e+00 | 3.37e+06 | 7.25e+06 | 1.12e+07 | 6.62e+06 | 8.30e+06 | 1.00e+07 | >tr A0A256WU97 A0A256WU97_9BACT | Nitrospira sp. UW-LDO-01          | ATP synthase subunit beta                      | 0         | 120.1  | 2.71e+09 | 38 | 1 | 1 | 1 | 23   | 10     | 52,216                      | A0A256WU97;A0A1W9G562;A0A0     | A0A256WU97;A0A1W9G562;A0A054L   | 149   | 0.68    | 0.00001 |
| 0.00e+00 | 1.11e+05 | 0.00e+00 | 0.00e+00 | 0.00e+00 | 0.00e+00 | 0.00e+00 | 0.00e+00 | 8.89e+06 | 1.55e+07 | >tr A0A054KRW9 A0A054KRW9_9BACT | Candidatus Nitrospira inopinata   | Putative RNA-binding protein RbpA              | 0         | 311.22 | 5.85e+08 | 5  | 1 | 1 | 1 | 2    | 13     | 10,707                      | A0A054KRW9;A0A054LH30          | A0A054KRW9;A0A054LH30           | 150   | 2.32    | 0.16172 |
| 0.00e+00 | 0.00e+00 | 0.00e+00 | 4.02e+04 | 0.00e+00 | 2.79e+06 | 2.54e+06 | 1.16e+06 | 0.00e+00 | 0.00e+00 | >tr A0A054KTS7 A0A054KTS7_9BACT | Candidatus Nitrospira inopinata   | Uncharacterized protein                        | 0         | 27,825 | 5.22e+09 | 0  | 2 | 2 | 1 | 1    | 8.4    | 25,918                      | A0A054KTS7                     | A0A054KTS7                      | 151   | 6.04    | 0.06175 |
| 0.00e+00 | 0.00e+00 | 0.00e+00 | 2.39e+05 | 2.31e+05 | 1.38e+06 | 1.68e+06 | 1.28e+06 | 1.52e+06 | 2.05e+06 | >tr A0A136K8A5 A0A136K8A5_9BACT | Nitrospira sp. OLB3               | Elongation factor Tu                           | 0         | 165.3  | 2.49e+08 | 10 | 3 | 3 | 1 | 11   | 10     | 43,814                      | A0A136K8A5;A0A054KU72;A0A25    | A0A136K8A5;A0A054KU72;A0A256W   | 152   | -1.45   | 0.00000 |
| 5.11e+07 | 7.09e+07 | 4.52e+07 | 6.05e+07 | 3.88e+07 | 1.80e+07 | 2.02e+07 | 1.48e+06 | 8.36e+06 | 3.62e+06 | >tr A0A054KUC6 A0A054KUC6_9BACT | Candidatus Nitrospira inopinata   | 10 kDa chaperonin                              | 0         | 24,586 | 1.13e+09 | 15 | 3 | 1 | 1 | 31.7 | 11,171 | A0A054KUC6                  | A0A054KUC6                     | 153                             | 1.08  | 0.02522 |         |
| 4.71e+06 | 5.38e+06 | 4.66e+06 | 5.41e+06 | 0.00e+00 | 6.46e+05 | 1.29e+06 | 2.05e+05 | 5.72e+05 | 4.85e+05 | >tr A0A054KV82 A0A054KV82_9BACT | Candidatus Nitrospira inopinata   | Putative Nitrite oxidoreductase, cytochrome c  | 0         | 84,353 | 1.47e+08 | 13 | 1 | 1 | 1 | 1    | 3.9    | 66,641                      | A0A054KV82                     | A0A054KV82                      | 154   | -0.64   | #ZAH!   |
| 8.59e+06 | 7.54e+06 | 5.34e+06 | 6.39e+06 | 6.67e+06 | 0.00e+00 | 9.18e+04 | 6.38e+05 | 2.33e+06 | 0.00e+00 | >tr A0A1W9IM91 A0A1W9IM91_9BACT | Nitrospira sp. ST-bin4            | Uncharacterized protein                        | 0         | 43,189 | 4.22e+08 | 7  | 1 | 1 | 1 | 6    | 19.7   | 8,666                       | A0A1W9IM91;A0A1W9H3B0;A0A1     | A0A1W9IM91;A0A1W9H3B0;A0A1W9    | 155   | 4.73    | 0.20699 |
| 0.00e+00 | 0.00e+00 | 0.00e+00 | 2.90e+05 | 0.00e+00 | 0.00e+00 | 4.32e+05 | 0.00e+00 | 0.00e+00 | 0.00e+00 | >tr A0A256WQC0 A0A256WQC0_9BACT | Nitrospira sp. UW-LDO-01          | Peroxidase                                     | 0         | 9,5454 | 1.75e+08 | 9  | 1 | 1 | 1 | 10   | 9      | 23,575                      | A0A256WQC0;A0A1W9J4S4;A0A1     | A0A256WQC0;A0A1W9J4S4;A0A1W9J   | 156   | 5.03    | 0.34670 |
| 1.13e+06 | 1.10e+06 | 7.31e+05 | 8.44e+05 | 7.30e+05 | 2.40e+06 | 2.21e+06 | 1.80e+06 | 2.05e+06 | 2.30e+06 | >tr A0A054L3G7 A0A054L3G7_9BACT | Candidatus Nitrospira nitrosa     | Peptidyl-prolyl cis-trans isomerase            | 0         | 6,3058 | 4.15e+08 | 2  | 1 | 1 | 1 | 2    | 7.8    | 19,33                       | A0A054L3G7;A0A256X0W9          | A0A054L3G7;A0A256X0W9           | 157   | 0.98    | 0.00000 |
| 6.91e+05 | 1.04e+06 | 8.89e+05 | 9.16e+05 | 7.37e+05 | 2.80e+05 | 2.72e+05 | 3.30e+05 | 2.49e+05 | 3.50e+05 | >tr A0A1W10H2 A0A1W10H2_9BACT   | Nitrospira japonica               | Glutamate synthase [NADPH] small chain         | 0         | 9,4262 | 1.17e+08 | 9  | 1 | 1 | 1 | 8    | 4.2    | 52,038                      | A0A1W10H2;A0A136KBQ8;A0A25     | A0A1W10H2;A0A136KBQ8;A0A256W    | 158   | 0.95    | 0.00000 |
| 5.57e+05 | 6.90e+05 | 4.28e+05 | 4.91e+05 | 5.63e+05 | 0.00e+00 | 0.00e+00 | 0.00e+00 | 0.00e+00 | 0.00e+00 | >tr A0A1W9GYB6 A0A1W9GYB6_9BACT | Nitrospira sp. HN-bin3            | Uncharacterized protein                        | 0,0071556 | 6,0228 | 2.31e+08 | 1  | 1 | 1 | 1 | 3    | 7.6    | 16,698                      | A0A1W9GYB6;A0A054L9H1;A0A25    | A0A1W9GYB6;A0A054L9H1;A0A256X   | 160   | #ZAH!   | #ZAH!   |
| 3.81e+05 | 6.84e+05 | 3.78e+05 | 0.00e+00 | 3.47e+05 | 3.11e+05 | 3.43e+05 | 2.18e+05 | 2.26e+05 | 0.00e+00 | >tr A0A1W9HEX4 A0A1W9HEX4_9BACT | Nitrospira sp. HN-bin3            | ATP citrate lyase (Fragment)                   | 0         | 7,5335 | 5.73e+07 | 1  | 1 | 1 | 1 | 2.3  | 65,022 | A0A1W9HEX4;A0A256X2E5;A0A11 | A0A1W9HEX4;A0A256X2E5;A0A11W9G | 161                             | -0.78 | 0.00638 |         |
| 0.00e+00 | 0.00e+00 | 0.00e+00 | 0.00e+00 | 0.00e+00 | 4.63e+05 | 1.66e+06 | 0.00e+00 | 1.77e+05 | 0.00e+00 | >tr D8P196 D8P196_9BACT         | Nitrospira defluvi                | Uncharacterized protein                        | 0,0084602 | 5,9257 | 4.36e+07 | 2  | 1 | 1 | 1 | 8    | 3.5    | 39,086                      | D8P196;A0A256WSP0;A0A1W9J7B    | D8P196;A0A256WSP0;A0A1W9J7B3;A  | 162   | -1.51   | #ZAH!   |
| 0.00e+00 | 0.00e+00 | 0.00e+00 | 0.00e+00 | 1.29e+05 | 0.00e+00 | 6.09e+05 | 0.00e+00 | 0.00e+00 | 1.00e+06 | >tr A0A1W9J310 A0A1W9J310_9BACT | Nitrospira sp. ST-bin4            | Iron-sulfur cluster assembly accessory protein | 0         | 65,047 | 2.24e+08 | 4  | 1 | 1 | 1 | 3    | 10.4   | 11,35                       | A0A1W9J310;A0A1W9G8F0;A0A05    | A0A1W9J310;A0A1W9G8F0;A0A054L   | 163   | 4.47    | 0.15800 |
| 1.00e+06 | 1.22e+06 | 0.00e+00 | 8.08e+05 | 1.12e+06 | 2.53e+05 | 2.72e+05 | 6.88e+04 | 1.58e+05 | 2.72e+05 | >tr A0A054LGM6 A0A054LGM6_9BACT | Candidatus Nitrospira nitrificans | Nitrite oxidoreductase, alpha subunit          | 0         | 17,616 | 7.67e+07 | 3  | 7 | 3 | 1 | 6    | 8.7    | 116,26                      | A0A054LGM6;A0A054LQF4;A0A05    | A0A054LGM6;A0A054LQF4;A0A054LD  | 165   | -1.67   | #ZAH!   |
| 1.47e+05 | 1.86e+05 | 1.63e+05 | 9.64e+04 | 1.44e+05 | 0.00e+00 | 0.00e+00 | 0.00e+00 | 8.35e+05 | 8.79e+05 | >tr A0A1W9IZ25 A0A1W9IZ25_9BACT | Nitrospira sp. ST-bin5            | Two-component system response regulator        | 0         | 116.39 | 1.04e+09 | 4  | 3 | 3 | 1 | 4    | 17.4   | 15,948                      | A0A1W9IZ25;A0A054LIZ9;A0A1W    | A0A1W9IZ25;A0A054LIZ9           | 167   | 6.23    | 0.14133 |
| 0.00e+00 | 0.00e+00 | 0.00e+00 | 0.00e+00 | 0.00e+00 | 1.11e+05 | 0.00e+00 | 0.00e+00 | 0.00e+00 | 0.00e+00 | >tr A0A054LND6 A0A054LND6_9BACT | Candidatus Nitrospira nitrificans | Amidohydrolase                                 | 0,0072072 | 6,0293 | 1.77e+07 | 1  | 1 | 1 | 1 | 1    | 3.6    | 48,391                      | A0A054LND6                     | A0A054LND6                      | 168   | 1.57    | 0.15229 |
| 3.06e+05 | 3.38e+05 | 0.00e+00 | 2.51e+05 | 2.00e+05 | 0.00e+00 | 0.00e+00 | 3.89e+04 | 0.00e+00 | 0.00e+00 | >tr A0A256WX69 A0A256WX69_9BACT | Nitrospira sp. UW-LDO-01          | Uncharacterized protein                        | 0         | 233.78 | 5.28e+07 | 4  | 1 | 1 | 1 | 2    | 5.5    | 34,423                      | A0A256WX69;A0A054LP90          | A0A256WX69;A0A054LP90           | 170   | 6.48    | 0.34773 |
| 0.00e+00 | 0.00e+00 |          |          |          |          |          |          |          |          |                                 |                                   |                                                |           |        |          |    |   |   |   |      |        |                             |                                |                                 |       |         |         |

|          |          |          |          |          |          |          |          |          |          |     |                             |                        |                                              |   |        |          |    |   |   |   |   |   |     |        |                                                                                                                                                                                                                                                                                                                                                                                                                                                                                                                                                                                                                                                                                                                                                                                                                                                                                                                                                                                                                                                                                                                                                                                                                                                                                                                                                                                                                                                                                                                                                                                                                                                                                                                                                                                                                                                                                                                                                                                                                                                                                                                                                                                                                                                                                                                                                                                                                                                                                                                                                                                                                                                                                                                                                                                                                                                                                                                                                                                                                                                                                                                                                                                                                                                                                                                                                                                                                                                                                                                                                                                                                                                                                                                                                                                                                                                                                                                                                                                                                                                                                                                                                                                                                                                                                                                                                                                                                                                                                                                                                                                                                                                                                                                                                                                                                                                                                                                                                                                                                                                                                                                                                                                                                                                                                                                                                                                                                                                                                                                                                                                                                                                                                                                                                                                                                                                                                                                                                                                                                                                                                                                                                                                                                                                                                                                                                                                                                                                                                                                                                                                                                                                                                                                                                                                                                                                                                                                                                                                                                                                                                                                                                                                                                                                                                                                                                                                                                                                                                                                                                                                                                                                                                                                                                                                                                                                                                                                                                                                                                                                                                                                                                                                                                                                                                                                                                                                                                                                                                                                                                                                                                                                                                                                                                                                                                                                                                                                                                                                                                                                                                                                                                                                                                                                                                                                                                                                                                                                                                                                                                                                                                                                                                                                                                                                                                                                                                                                                                                                                                                                                                                                                                                                                                                                                                                                                                                                                                                                                                                                                                                                                                                                                                                                                                                                                                                                                                                                                                                                                                                                                                                                                                                                                                                                                                                                                                                                                                                                                                                                                                                                                                                                                                                                                                                                                                                                                                                                                                                                                                                                                                                                                                                                                                                             |            |     |      |         |
|----------|----------|----------|----------|----------|----------|----------|----------|----------|----------|-----|-----------------------------|------------------------|----------------------------------------------|---|--------|----------|----|---|---|---|---|---|-----|--------|---------------------------------------------------------------------------------------------------------------------------------------------------------------------------------------------------------------------------------------------------------------------------------------------------------------------------------------------------------------------------------------------------------------------------------------------------------------------------------------------------------------------------------------------------------------------------------------------------------------------------------------------------------------------------------------------------------------------------------------------------------------------------------------------------------------------------------------------------------------------------------------------------------------------------------------------------------------------------------------------------------------------------------------------------------------------------------------------------------------------------------------------------------------------------------------------------------------------------------------------------------------------------------------------------------------------------------------------------------------------------------------------------------------------------------------------------------------------------------------------------------------------------------------------------------------------------------------------------------------------------------------------------------------------------------------------------------------------------------------------------------------------------------------------------------------------------------------------------------------------------------------------------------------------------------------------------------------------------------------------------------------------------------------------------------------------------------------------------------------------------------------------------------------------------------------------------------------------------------------------------------------------------------------------------------------------------------------------------------------------------------------------------------------------------------------------------------------------------------------------------------------------------------------------------------------------------------------------------------------------------------------------------------------------------------------------------------------------------------------------------------------------------------------------------------------------------------------------------------------------------------------------------------------------------------------------------------------------------------------------------------------------------------------------------------------------------------------------------------------------------------------------------------------------------------------------------------------------------------------------------------------------------------------------------------------------------------------------------------------------------------------------------------------------------------------------------------------------------------------------------------------------------------------------------------------------------------------------------------------------------------------------------------------------------------------------------------------------------------------------------------------------------------------------------------------------------------------------------------------------------------------------------------------------------------------------------------------------------------------------------------------------------------------------------------------------------------------------------------------------------------------------------------------------------------------------------------------------------------------------------------------------------------------------------------------------------------------------------------------------------------------------------------------------------------------------------------------------------------------------------------------------------------------------------------------------------------------------------------------------------------------------------------------------------------------------------------------------------------------------------------------------------------------------------------------------------------------------------------------------------------------------------------------------------------------------------------------------------------------------------------------------------------------------------------------------------------------------------------------------------------------------------------------------------------------------------------------------------------------------------------------------------------------------------------------------------------------------------------------------------------------------------------------------------------------------------------------------------------------------------------------------------------------------------------------------------------------------------------------------------------------------------------------------------------------------------------------------------------------------------------------------------------------------------------------------------------------------------------------------------------------------------------------------------------------------------------------------------------------------------------------------------------------------------------------------------------------------------------------------------------------------------------------------------------------------------------------------------------------------------------------------------------------------------------------------------------------------------------------------------------------------------------------------------------------------------------------------------------------------------------------------------------------------------------------------------------------------------------------------------------------------------------------------------------------------------------------------------------------------------------------------------------------------------------------------------------------------------------------------------------------------------------------------------------------------------------------------------------------------------------------------------------------------------------------------------------------------------------------------------------------------------------------------------------------------------------------------------------------------------------------------------------------------------------------------------------------------------------------------------------------------------------------------------------------------------------------------------------------------------------------------------------------------------------------------------------------------------------------------------------------------------------------------------------------------------------------------------------------------------------------------------------------------------------------------------------------------------------------------------------------------------------------------------------------------------------------------------------------------------------------------------------------------------------------------------------------------------------------------------------------------------------------------------------------------------------------------------------------------------------------------------------------------------------------------------------------------------------------------------------------------------------------------------------------------------------------------------------------------------------------------------------------------------------------------------------------------------------------------------------------------------------------------------------------------------------------------------------------------------------------------------------------------------------------------------------------------------------------------------------------------------------------------------------------------------------------------------------------------------------------------------------------------------------------------------------------------------------------------------------------------------------------------------------------------------------------------------------------------------------------------------------------------------------------------------------------------------------------------------------------------------------------------------------------------------------------------------------------------------------------------------------------------------------------------------------------------------------------------------------------------------------------------------------------------------------------------------------------------------------------------------------------------------------------------------------------------------------------------------------------------------------------------------------------------------------------------------------------------------------------------------------------------------------------------------------------------------------------------------------------------------------------------------------------------------------------------------------------------------------------------------------------------------------------------------------------------------------------------------------------------------------------------------------------------------------------------------------------------------------------------------------------------------------------------------------------------------------------------------------------------------------------------------------------------------------------------------------------------------------------------------------------------------------------------------------------------------------------------------------------------------------------------------------------------------------------------------------------------------------------------------------------------------------------------------------------------------------------------------------------------------------------------------------------------------------------------------------------------------------------------------------------------------------------------------------------------------------------------------------------------------------------------------------------------------------------------------------------------------------------------------------------------------------------------------------------------------------------------------------------------------------------------------------------------------------------------------------------------------------------------------------------------------------------------------------------------------------------------------------------------------------------------------------------------------------------------------------------------------------------------------------------------------------------------------------------------------------------------------------------------------------------------------------------------------------------------------------------------|------------|-----|------|---------|
| 5.36E+04 | 6.13E+04 | 1.00E+05 | 1.27E+05 | 0.00E+00 | 1.17E+06 | 0.00E+00 | 9.34E+05 | 8.65E+05 | 1.06E+06 | >tr | A0A1H3GA99 A0A1H3GA99_9PROT | Nitrosomonas halophila | O-acetylhomoserine (Thiol)-lyase             | 0 | 6,8451 | 3.04E+08 | 9  | 1 | 1 | 1 | 1 | 1 | 2,8 | 45,865 | A0A1H3GA99                                                                                                                                                                                                                                                                                                                                                                                                                                                                                                                                                                                                                                                                                                                                                                                                                                                                                                                                                                                                                                                                                                                                                                                                                                                                                                                                                                                                                                                                                                                                                                                                                                                                                                                                                                                                                                                                                                                                                                                                                                                                                                                                                                                                                                                                                                                                                                                                                                                                                                                                                                                                                                                                                                                                                                                                                                                                                                                                                                                                                                                                                                                                                                                                                                                                                                                                                                                                                                                                                                                                                                                                                                                                                                                                                                                                                                                                                                                                                                                                                                                                                                                                                                                                                                                                                                                                                                                                                                                                                                                                                                                                                                                                                                                                                                                                                                                                                                                                                                                                                                                                                                                                                                                                                                                                                                                                                                                                                                                                                                                                                                                                                                                                                                                                                                                                                                                                                                                                                                                                                                                                                                                                                                                                                                                                                                                                                                                                                                                                                                                                                                                                                                                                                                                                                                                                                                                                                                                                                                                                                                                                                                                                                                                                                                                                                                                                                                                                                                                                                                                                                                                                                                                                                                                                                                                                                                                                                                                                                                                                                                                                                                                                                                                                                                                                                                                                                                                                                                                                                                                                                                                                                                                                                                                                                                                                                                                                                                                                                                                                                                                                                                                                                                                                                                                                                                                                                                                                                                                                                                                                                                                                                                                                                                                                                                                                                                                                                                                                                                                                                                                                                                                                                                                                                                                                                                                                                                                                                                                                                                                                                                                                                                                                                                                                                                                                                                                                                                                                                                                                                                                                                                                                                                                                                                                                                                                                                                                                                                                                                                                                                                                                                                                                                                                                                                                                                                                                                                                                                                                                                                                                                                                                                                                                                                  | A0A1H3GA99 | 260 | 1,47 | 0,00475 |
| 3.56E+06 | 2.23E+06 | 3.62E+06 | 0.00E+00 | 4.03E+06 | 2.09E+06 | 4.16E+05 | 6.03E+04 | 4.51E+05 | 3.36E+05 | >tr | A0A1H4QM7 A0A1H4QM7_9PROT   | Nitrosomonas communis  | 2,3,4,5-tetrahydropyridine-2,6-dicarboxylate | 0 | 59,323 | 8.20E+07 | 10 | 1 | 1 | 1 | 1 | 3 | 5,1 | 29,777 | A0A1H4QM7;A0A1H4QK11;A0A1H4QK12;A0A1H4QK13;A0A1H4QK14;A0A1H4QK15;A0A1H4QK16;A0A1H4QK17;A0A1H4QK18;A0A1H4QK19;A0A1H4QK20;A0A1H4QK21;A0A1H4QK22;A0A1H4QK23;A0A1H4QK24;A0A1H4QK25;A0A1H4QK26;A0A1H4QK27;A0A1H4QK28;A0A1H4QK29;A0A1H4QK30;A0A1H4QK31;A0A1H4QK32;A0A1H4QK33;A0A1H4QK34;A0A1H4QK35;A0A1H4QK36;A0A1H4QK37;A0A1H4QK38;A0A1H4QK39;A0A1H4QK40;A0A1H4QK41;A0A1H4QK42;A0A1H4QK43;A0A1H4QK44;A0A1H4QK45;A0A1H4QK46;A0A1H4QK47;A0A1H4QK48;A0A1H4QK49;A0A1H4QK50;A0A1H4QK51;A0A1H4QK52;A0A1H4QK53;A0A1H4QK54;A0A1H4QK55;A0A1H4QK56;A0A1H4QK57;A0A1H4QK58;A0A1H4QK59;A0A1H4QK60;A0A1H4QK61;A0A1H4QK62;A0A1H4QK63;A0A1H4QK64;A0A1H4QK65;A0A1H4QK66;A0A1H4QK67;A0A1H4QK68;A0A1H4QK69;A0A1H4QK70;A0A1H4QK71;A0A1H4QK72;A0A1H4QK73;A0A1H4QK74;A0A1H4QK75;A0A1H4QK76;A0A1H4QK77;A0A1H4QK78;A0A1H4QK79;A0A1H4QK80;A0A1H4QK81;A0A1H4QK82;A0A1H4QK83;A0A1H4QK84;A0A1H4QK85;A0A1H4QK86;A0A1H4QK87;A0A1H4QK88;A0A1H4QK89;A0A1H4QK90;A0A1H4QK91;A0A1H4QK92;A0A1H4QK93;A0A1H4QK94;A0A1H4QK95;A0A1H4QK96;A0A1H4QK97;A0A1H4QK98;A0A1H4QK99;A0A1H4QK100;A0A1H4QK101;A0A1H4QK102;A0A1H4QK103;A0A1H4QK104;A0A1H4QK105;A0A1H4QK106;A0A1H4QK107;A0A1H4QK108;A0A1H4QK109;A0A1H4QK110;A0A1H4QK111;A0A1H4QK112;A0A1H4QK113;A0A1H4QK114;A0A1H4QK115;A0A1H4QK116;A0A1H4QK117;A0A1H4QK118;A0A1H4QK119;A0A1H4QK120;A0A1H4QK121;A0A1H4QK122;A0A1H4QK123;A0A1H4QK124;A0A1H4QK125;A0A1H4QK126;A0A1H4QK127;A0A1H4QK128;A0A1H4QK129;A0A1H4QK130;A0A1H4QK131;A0A1H4QK132;A0A1H4QK133;A0A1H4QK134;A0A1H4QK135;A0A1H4QK136;A0A1H4QK137;A0A1H4QK138;A0A1H4QK139;A0A1H4QK140;A0A1H4QK141;A0A1H4QK142;A0A1H4QK143;A0A1H4QK144;A0A1H4QK145;A0A1H4QK146;A0A1H4QK147;A0A1H4QK148;A0A1H4QK149;A0A1H4QK150;A0A1H4QK151;A0A1H4QK152;A0A1H4QK153;A0A1H4QK154;A0A1H4QK155;A0A1H4QK156;A0A1H4QK157;A0A1H4QK158;A0A1H4QK159;A0A1H4QK160;A0A1H4QK161;A0A1H4QK162;A0A1H4QK163;A0A1H4QK164;A0A1H4QK165;A0A1H4QK166;A0A1H4QK167;A0A1H4QK168;A0A1H4QK169;A0A1H4QK170;A0A1H4QK171;A0A1H4QK172;A0A1H4QK173;A0A1H4QK174;A0A1H4QK175;A0A1H4QK176;A0A1H4QK177;A0A1H4QK178;A0A1H4QK179;A0A1H4QK180;A0A1H4QK181;A0A1H4QK182;A0A1H4QK183;A0A1H4QK184;A0A1H4QK185;A0A1H4QK186;A0A1H4QK187;A0A1H4QK188;A0A1H4QK189;A0A1H4QK190;A0A1H4QK191;A0A1H4QK192;A0A1H4QK193;A0A1H4QK194;A0A1H4QK195;A0A1H4QK196;A0A1H4QK197;A0A1H4QK198;A0A1H4QK199;A0A1H4QK200;A0A1H4QK201;A0A1H4QK202;A0A1H4QK203;A0A1H4QK204;A0A1H4QK205;A0A1H4QK206;A0A1H4QK207;A0A1H4QK208;A0A1H4QK209;A0A1H4QK210;A0A1H4QK211;A0A1H4QK212;A0A1H4QK213;A0A1H4QK214;A0A1H4QK215;A0A1H4QK216;A0A1H4QK217;A0A1H4QK218;A0A1H4QK219;A0A1H4QK220;A0A1H4QK221;A0A1H4QK222;A0A1H4QK223;A0A1H4QK224;A0A1H4QK225;A0A1H4QK226;A0A1H4QK227;A0A1H4QK228;A0A1H4QK229;A0A1H4QK230;A0A1H4QK231;A0A1H4QK232;A0A1H4QK233;A0A1H4QK234;A0A1H4QK235;A0A1H4QK236;A0A1H4QK237;A0A1H4QK238;A0A1H4QK239;A0A1H4QK240;A0A1H4QK241;A0A1H4QK242;A0A1H4QK243;A0A1H4QK244;A0A1H4QK245;A0A1H4QK246;A0A1H4QK247;A0A1H4QK248;A0A1H4QK249;A0A1H4QK250;A0A1H4QK251;A0A1H4QK252;A0A1H4QK253;A0A1H4QK254;A0A1H4QK255;A0A1H4QK256;A0A1H4QK257;A0A1H4QK258;A0A1H4QK259;A0A1H4QK260;A0A1H4QK261;A0A1H4QK262;A0A1H4QK263;A0A1H4QK264;A0A1H4QK265;A0A1H4QK266;A0A1H4QK267;A0A1H4QK268;A0A1H4QK269;A0A1H4QK270;A0A1H4QK271;A0A1H4QK272;A0A1H4QK273;A0A1H4QK274;A0A1H4QK275;A0A1H4QK276;A0A1H4QK277;A0A1H4QK278;A0A1H4QK279;A0A1H4QK280;A0A1H4QK281;A0A1H4QK282;A0A1H4QK283;A0A1H4QK284;A0A1H4QK285;A0A1H4QK286;A0A1H4QK287;A0A1H4QK288;A0A1H4QK289;A0A1H4QK290;A0A1H4QK291;A0A1H4QK292;A0A1H4QK293;A0A1H4QK294;A0A1H4QK295;A0A1H4QK296;A0A1H4QK297;A0A1H4QK298;A0A1H4QK299;A0A1H4QK300;A0A1H4QK301;A0A1H4QK302;A0A1H4QK303;A0A1H4QK304;A0A1H4QK305;A0A1H4QK306;A0A1H4QK307;A0A1H4QK308;A0A1H4QK309;A0A1H4QK310;A0A1H4QK311;A0A1H4QK312;A0A1H4QK313;A0A1H4QK314;A0A1H4QK315;A0A1H4QK316;A0A1H4QK317;A0A1H4QK318;A0A1H4QK319;A0A1H4QK320;A0A1H4QK321;A0A1H4QK322;A0A1H4QK323;A0A1H4QK324;A0A1H4QK325;A0A1H4QK326;A0A1H4QK327;A0A1H4QK328;A0A1H4QK329;A0A1H4QK330;A0A1H4QK331;A0A1H4QK332;A0A1H4QK333;A0A1H4QK334;A0A1H4QK335;A0A1H4QK336;A0A1H4QK337;A0A1H4QK338;A0A1H4QK339;A0A1H4QK340;A0A1H4QK341;A0A1H4QK342;A0A1H4QK343;A0A1H4QK344;A0A1H4QK345;A0A1H4QK346;A0A1H4QK347;A0A1H4QK348;A0A1H4QK349;A0A1H4QK350;A0A1H4QK351;A0A1H4QK352;A0A1H4QK353;A0A1H4QK354;A0A1H4QK355;A0A1H4QK356;A0A1H4QK357;A0A1H4QK358;A0A1H4QK359;A0A1H4QK360;A0A1H4QK361;A0A1H4QK362;A0A1H4QK363;A0A1H4QK364;A0A1H4QK365;A0A1H4QK366;A0A1H4QK367;A0A1H4QK368;A0A1H4QK369;A0A1H4QK370;A0A1H4QK371;A0A1H4QK372;A0A1H4QK373;A0A1H4QK374;A0A1H4QK375;A0A1H4QK376;A0A1H4QK377;A0A1H4QK378;A0A1H4QK379;A0A1H4QK380;A0A1H4QK381;A0A1H4QK382;A0A1H4QK383;A0A1H4QK384;A0A1H4QK385;A0A1H4QK386;A0A1H4QK387;A0A1H4QK388;A0A1H4QK389;A0A1H4QK390;A0A1H4QK391;A0A1H4QK392;A0A1H4QK393;A0A1H4QK394;A0A1H4QK395;A0A1H4QK396;A0A1H4QK397;A0A1H4QK398;A0A1H4QK399;A0A1H4QK400;A0A1H4QK401;A0A1H4QK402;A0A1H4QK403;A0A1H4QK404;A0A1H4QK405;A0A1H4QK406;A0A1H4QK407;A0A1H4QK408;A0A1H4QK409;A0A1H4QK410;A0A1H4QK411;A0A1H4QK412;A0A1H4QK413;A0A1H4QK414;A0A1H4QK415;A0A1H4QK416;A0A1H4QK417;A0A1H4QK418;A0A1H4QK419;A0A1H4QK420;A0A1H4QK421;A0A1H4QK422;A0A1H4QK423;A0A1H4QK424;A0A1H4QK425;A0A1H4QK426;A0A1H4QK427;A0A1H4QK428;A0A1H4QK429;A0A1H4QK430;A0A1H4QK431;A0A1H4QK432;A0A1H4QK433;A0A1H4QK434;A0A1H4QK435;A0A1H4QK436;A0A1H4QK437;A0A1H4QK438;A0A1H4QK439;A0A1H4QK440;A0A1H4QK441;A0A1H4QK442;A0A1H4QK443;A0A1H4QK444;A0A1H4QK445;A0A1H4QK446;A0A1H4QK447;A0A1H4QK448;A0A1H4QK449;A0A1H4QK450;A0A1H4QK451;A0A1H4QK452;A0A1H4QK453;A0A1H4QK454;A0A1H4QK455;A0A1H4QK456;A0A1H4QK457;A0A1H4QK458;A0A1H4QK459;A0A1H4QK460;A0A1H4QK461;A0A1H4QK462;A0A1H4QK463;A0A1H4QK464;A0A1H4QK465;A0A1H4QK466;A0A1H4QK467;A0A1H4QK468;A0A1H4QK469;A0A1H4QK470;A0A1H4QK471;A0A1H4QK472;A0A1H4QK473;A0A1H4QK474;A0A1H4QK475;A0A1H4QK476;A0A1H4QK477;A0A1H4QK478;A0A1H4QK479;A0A1H4QK480;A0A1H4QK481;A0A1H4QK482;A0A1H4QK483;A0A1H4QK484;A0A1H4QK485;A0A1H4QK486;A0A1H4QK487;A0A1H4QK488;A0A1H4QK489;A0A1H4QK490;A0A1H4QK491;A0A1H4QK492;A0A1H4QK493;A0A1H4QK494;A0A1H4QK495;A0A1H4QK496;A0A1H4QK497;A0A1H4QK498;A0A1H4QK499;A0A1H4QK500;A0A1H4QK501;A0A1H4QK502;A0A1H4QK503;A0A1H4QK504;A0A1H4QK505;A0A1H4QK506;A0A1H4QK507;A0A1H4QK508;A0A1H4QK509;A0A1H4QK510;A0A1H4QK511;A0A1H4QK512;A0A1H4QK513;A0A1H4QK514;A0A1H4QK515;A0A1H4QK516;A0A1H4QK517;A0A1H4QK518;A0A1H4QK519;A0A1H4QK520;A0A1H4QK521;A0A1H4QK522;A0A1H4QK523;A0A1H4QK524;A0A1H4QK525;A0A1H4QK526;A0A1H4QK527;A0A1H4QK528;A0A1H4QK529;A0A1H4QK530;A0A1H4QK531;A0A1H4QK532;A0A1H4QK533;A0A1H4QK534;A0A1H4QK535;A0A1H4QK536;A0A1H4QK537;A0A1H4QK538;A0A1H4QK539;A0A1H4QK540;A0A1H4QK541;A0A1H4QK542;A0A1H4QK543;A0A1H4QK544;A0A1H4QK545;A0A1H4QK546;A0A1H4QK547;A0A1H4QK548;A0A1H4QK549;A0A1H4QK550;A0A1H4QK551;A0A1H4QK552;A0A1H4QK553;A0A1H4QK554;A0A1H4QK555;A0A1H4QK556;A0A1H4QK557;A0A1H4QK558;A0A1H4QK559;A0A1H4QK560;A0A1H4QK561;A0A1H4QK562;A0A1H4QK563;A0A1H4QK564;A0A1H4QK565;A0A1H4QK566;A0A1H4QK567;A0A1H4QK568;A0A1H4QK569;A0A1H4QK570;A0A1H4QK571;A0A1H4QK572;A0A1H4QK573;A0A1H4QK574;A0A1H4QK575;A0A1H4QK576;A0A1H4QK577;A0A1H4QK578;A0A1H4QK579;A0A1H4QK580;A0A1H4QK581;A0A1H4QK582;A0A1H4QK583;A0A1H4QK584;A0A1H4QK585;A0A1H4QK586;A0A1H4QK587;A0A1H4QK588;A0A1H4QK589;A0A1H4QK590;A0A1H4QK591;A0A1H4QK592;A0A1H4QK593;A0A1H4QK594;A0A1H4QK595;A0A1H4QK596;A0A1H4QK597;A0A1H4QK598;A0A1H4QK599;A0A1H4QK600;A0A1H4QK601;A0A1H4QK602;A0A1H4QK603;A0A1H4QK604;A0A1H4QK605;A0A1H4QK606;A0A1H4QK607;A0A1H4QK608;A0A1H4QK609;A0A1H4QK610;A0A1H4QK611;A0A1H4QK612;A0A1H4QK613;A0A1H4QK614;A0A1H4QK615;A0A1H4QK616;A0A1H4QK617;A0A1H4QK618;A0A1H4QK619;A0A1H4QK620;A0A1H4QK621;A0A1H4QK622;A0A1H4QK623;A0A1H4QK624;A0A1H4QK625;A0A1H4QK626;A0A1H4QK627;A0A1H4QK628;A0A1H4QK629;A0A1H4QK630;A0A1H4QK631;A0A1H4QK632;A0A1H4QK633;A0A1H4QK634;A0A1H4QK635;A0A1H4QK636;A0A1H4QK637;A0A1H4QK638;A0A1H4QK639;A0A1H4QK640;A0A1H4QK641;A0A1H4QK642;A0A1H4QK643;A0A1H4QK644;A0A1H4QK645;A0A1H4QK646;A0A1H4QK647;A0A1H4QK648;A0A1H4QK649;A0A1H4QK650;A0A1H4QK651;A0A1H4QK652;A0A1H4QK653;A0A1H4QK654;A0A1H4QK655;A0A1H4QK656;A0A1H4QK657;A0A1H4QK658;A0A1H4QK659;A0A1H4QK660;A0A1H4QK661;A0A1H4QK662;A0A1H4QK663;A0A1H4QK664;A0A1H4QK665;A0A1H4QK666;A0A1H4QK667;A0A1H4QK668;A0A1H4QK669;A0A1H4QK670;A0A1H4QK671;A0A1H4QK672;A0A1H4QK673;A0A1H4QK674;A0A1H4QK675;A0A1H4QK676;A0A1H4QK677;A0A1H4QK678;A0A1H4QK679;A0A1H4QK680;A0A1H4QK681;A0A1H4QK682;A0A1H4QK683;A0A1H4QK684;A0A1H4QK685;A0A1H4QK686;A0A1H4QK687;A0A1H4QK688;A0A1H4QK689;A0A1H4QK690;A0A1H4QK691;A0A1H4QK692;A0A1H4QK693;A0A1H4QK694;A0A1H4QK695;A0A1H4QK696;A0A1H4QK697;A0A1H4QK698;A0A1H4QK699;A0A1H4QK700;A0A1H4QK701;A0A1H4QK702;A0A1H4QK703;A0A1H4QK704;A0A1H4QK705;A0A1H4QK706;A0A1H4QK707;A0A1H4QK708;A0A1H4QK709;A0A1H4QK710;A0A1H4QK711;A0A1H4QK712;A0A1H4QK713;A0A1H4QK714;A0A1H4QK715;A0A1H4QK716;A0A1H4QK717;A0A1H4QK718;A0A1H4QK719;A0A1H4QK720;A0A1H4QK721;A0A1H4QK722;A0A1H4QK723;A0A1H4QK724;A0A1H4QK725;A0A1H4QK726;A0A1H4QK727;A0A1H4QK728;A0A1H4QK729;A0A1H4QK730;A0A1H4QK731;A0A1H4QK732;A0A1H4QK733;A0A1H4QK734;A0A1H4QK735;A0A1H4QK736;A0A1H4QK737;A0A1H4QK738;A0A1H4QK739;A0A1H4QK740;A0A1H4QK741;A0A1H4QK742;A0A1H4QK743;A0A1H4QK744;A0A1H4QK745;A0A1H4QK746;A0A1H4QK747;A0A1H4QK748;A0A1H4QK749;A0A1H4QK750;A0A1H4QK751;A0A1H4QK752;A0A1H4QK753;A0A1H4QK754;A0A1H4QK755;A0A1H4QK756;A0A1H4QK757;A0A1H4QK758;A0A1H4QK759;A0A1H4QK760;A0A1H4QK761;A0A1H4QK762;A0A1H4QK763;A0A1H4QK764;A0A1H4QK765;A0A1H4QK766;A0A1H4QK767;A0A1H4QK768;A0A1H4QK769;A0A1H4QK770;A0A1H4QK771;A0A1H4QK772;A0A1H4QK773;A0A1H4QK774;A0A1H4QK775;A0A1H4QK776;A0A1H4QK777;A0A1H4QK778;A0A1H4QK779;A0A1H4QK780;A0A1H4QK781;A0A1H4QK782;A0A1H4QK783;A0A1H4QK784;A0A1H4QK785;A0A1H4QK786;A0A1H4QK787;A0A1H4QK788;A0A1H4QK789;A0A1H4QK790;A0A1H4QK791;A0A1H4QK792;A0A1H4QK793;A0A1H4QK794;A0A1H4QK795;A0A1H4QK796;A0A1H4QK797;A0A1H4QK798;A0A1H4QK799;A0A1H4QK800;A0A1H4QK801;A0A1H4QK802;A0A1H4QK803;A0A1H4QK804;A0A1H4QK805;A0A1H4QK806;A0A1H4QK807;A0A1H4QK808;A0A1H4QK809;A0A1H4QK810;A0A1H4QK811;A0A1H4QK812;A0A1H4QK813;A0A1H4QK814;A0A1H4QK815;A0A1H4QK816;A0A1H4QK817;A0A1H4QK818;A0A1H4QK819;A0A1H4QK820;A0A1H4QK821;A0A1H4QK822;A0A1H4QK823;A0A1H4QK824;A0A1H4QK825;A0A1H4QK826;A0A1H4QK827;A0A1H4QK828;A0A1H4QK829;A0A1H4QK830;A0A1H4QK831;A0A1H4QK832;A0A1H4QK833;A0A1H4QK834;A0A1H4QK835;A0A1H4QK836;A0A1H4QK837;A0A1H4QK838;A0A1H4QK839;A0A1H4QK840;A0A1H4QK841;A0A1H4QK842;A0A1H4QK843;A0A1H4QK844;A0A1H4QK845;A0A1H4QK846;A0A1H4QK847;A0A1H4QK848;A0A1H4QK849;A0A1H4QK850;A0A1H4QK851;A0A1H4QK852;A0A1H4QK853;A0A1H4QK854;A0A1H4QK855;A0A1H4QK856;A0A1H4QK857;A0A1H4QK858;A0A1H4QK859;A0A1H4QK860;A0A1H4QK861;A0A1H4QK862;A0A1H4QK863;A0A1H4QK864;A0A1H4QK865;A0A1H4QK866;A0A1H4QK867;A0A1H4QK868;A0A1H4QK869;A0A1H4QK870;A0A1H4QK871;A0A1H4QK872;A0A1H4QK873;A0A1H4QK874;A0A1H4QK875;A0A1H4QK876;A0A1H4QK877;A0A1H4QK878;A0A1H4QK879;A0A1H4QK880;A0A1H4QK881;A0A1H4QK882;A0A1H4QK883;A0A1H4QK884;A0A1H4QK885;A0A1H4QK886;A0A1H4QK887;A0A1H4QK888;A0A1H4QK889;A0A1H4QK890;A0A1H4QK891;A0A1H4QK892;A0A1H4QK893;A0A1H4QK894;A0A1H4QK895;A0A1H4QK896;A0A1H4QK897;A0A1H4QK898;A0A1H4QK899;A0A1H4QK900;A0A1H4QK901;A0A1H4QK902;A0A1H4QK903;A0A1H4QK904;A0A1H4QK905;A0A1H4QK906;A0A1H4QK907;A0A1H4QK908;A0A1H4QK909;A0A1H4QK910;A0A1H4QK911;A0A1H4QK912;A0A1H4QK913;A0A1H4QK914;A0A1H4QK915;A0A1H4QK916;A0A1H4QK917;A0A1H4QK918;A0A1H4QK919;A0A1H4QK920;A0A1H4QK921;A0A1H4QK922;A0A1H4QK923;A0A1H4QK924;A0A1H4QK925;A0A1H4QK926;A0A1H4QK927;A0A1H4QK928;A0A1H4QK929;A0A1H4QK930;A0A1H4QK931;A0A1H4QK932;A0A1H4QK933;A0A1H4QK934;A0A1H4QK935;A0A1H4QK936;A0A1H4QK937;A0A1H4QK938;A0A1H4QK939;A0A1H4QK940;A0A1H4QK941;A0A1H4QK942;A0A1H4QK943;A0A1H4QK944;A0A1H4QK945;A0A1H4QK946;A0A1H4QK947;A0A1H4QK948;A0A1H4QK949;A0A1H4QK950;A0A1H4QK951;A0A1H4QK952;A0A1H4QK953;A0A1H4QK954;A0A1H4QK955;A0A1H4QK956;A0A1H4QK957;A0A1H4QK958;A0A1H4QK959;A0A1H4QK960;A0A1H4QK961;A0A1H4QK962;A0A1H4QK963;A0A1H4QK964;A0A1H4QK965;A0A1H4QK966;A0A1H4QK967;A0A1H4QK968;A0A1H4QK969;A0A1H4QK970;A0A1H4QK971;A0A1H4QK972;A0A1H4QK973;A0A1H4QK974;A0A1H4QK975;A0A1H4QK976;A0A1H4QK977;A0A1H4QK978;A0A1H4QK979;A0A1H4QK980;A0A1H4QK981;A0A1H4QK982;A0A1H4QK983;A0A1H4QK984;A0A1H4QK985;A0A1H4QK986;A0A1H4QK987;A0A1H4QK988;A0A1H4QK989;A0A1H4QK990;A0A1H4QK991;A0A1H4QK992;A0A1H4QK993;A0A1H4QK994;A0A1H4QK995;A0A1H4QK996;A0 |            |     |      |         |

|          |          |          |          |          |          |          |          |          |          |                                  |                                    |                                              |           |        |          |    |   |   |   |      |        |                             |                               |                                |       |         |         |
|----------|----------|----------|----------|----------|----------|----------|----------|----------|----------|----------------------------------|------------------------------------|----------------------------------------------|-----------|--------|----------|----|---|---|---|------|--------|-----------------------------|-------------------------------|--------------------------------|-------|---------|---------|
| 6.96E+06 | 7.65E+06 | 5.70E+06 | 5.35E+06 | 4.97E+06 | 2.13E+06 | 2.14E+06 | 4.05E+05 | 8.90E+05 | 8.82E+05 | >tr A0A1I5IYE0 A0A1I5IYE0_PARP_N | Paracoccus pantotrophus            | 3-oxoacid CoA-transferase subunit B          | 0         | 6,1922 | 7,06E+07 | 1  | 1 | 1 | 1 | 6,7  | 21,997 | A0A1I5IYE0                  | A0A1I5IYE0                    | 475                            | -1,43 | 0,00676 |         |
| 0,00E+00 | 4,25E+05 | 4,15E+05 | 0,00E+00 | 3,87E+05 | 2,82E+05 | 0,00E+00 | 1,14E+05 | 0,00E+00 | 1,85E+05 | >tr A0A1I7H3Z1 A0A1I7H3Z1_9PROT  | Nitrosomonas europaea              | Polyposphate kinase                          | 0         | 6,3836 | 3,06E+07 | 4  | 1 | 1 | 1 | 2,1  | 39,509 | A0A1I7H3Z1                  | A0A1I7H3Z1                    | 476                            | -1,12 | #ZAH!   |         |
| 5,45E+06 | 4,32E+07 | 4,41E+07 | 2,86E+06 | 1,12E+07 | 0,00E+00 | 1,42E+05 | 1,26E+05 | 0,00E+00 | 7,71E+05 | >tr A0A2H5EUU3 A0A2H5EUU3_9RHOB  | Paracoccus zejiangensis            | Branched-chain amino acid ABC transporter s  | 0         | 7,5432 | 1,66E+07 | 1  | 1 | 1 | 1 | 3    | 39,518 | A0A2H5EUU3;A0A1W6D1B4;A0A1  | A0A2H5EUU3;A0A1W6D1B4;A0A19B  | 477                            | #ZAH! | #ZAH!   |         |
| 0,00E+00 | 3,86E+06 | 3,81E+06 | 8,35E+06 | 0,00E+00 | 3,44E+06 | 3,61E+06 | 0,00E+00 | 0,00E+00 | 0,00E+00 | >tr A0A1Q3V14 A0A1Q3V14_9BRAD    | Nitrobacter sp. 62-13              | 10 kDa chaperonin                            | 0         | 20,041 | 1,18E+08 | 4  | 1 | 1 | 4 | 10,2 | 10,592 | A0A1Q3V14;A0A1M3C840;Q1QP   | A0A1Q3V14;A0A1M3C840;Q1QP31;A | 478                            | 0,83  | #ZAH!   |         |
| 0,00E+00 | 0,00E+00 | 0,00E+00 | 0,00E+00 | 0,00E+00 | 0,00E+00 | 8,04E+05 | 6,47E+05 | 0,00E+00 | 1,20E+06 | >tr A0A1V4HXX5 A0A1V4HXX5_NITVU  | Nitrobacter vulgaris               | Cold-shock protein                           | 0         | 6,5412 | 6,84E+08 | 4  | 1 | 1 | 1 | 2    | 15,9   | 7,4163                      | A0A1V4HXX5;A0A1M3CA30         | A0A1V4HXX5;A0A1M3CA30          | 479   | 5,99    | 0,05361 |
| 3,94E+06 | 4,71E+06 | 3,00E+06 | 5,93E+06 | 3,96E+06 | 1,46E+06 | 0,00E+00 | 0,00E+00 | 1,44E+06 | 0,00E+00 | >tr A0A1M3CDI3 A0A1M3CDI3_9BRAD  | Nitrobacter sp. 62-23              | UDP-glucose 6-dehydrogenase (Fragment)       | 0,0071429 | 6,0224 | 2,02E+08 | 2  | 1 | 1 | 1 | 11   | 3,8    | 36,713                      | A0A1M3CDI3;Q35V81;Q1QPE2;A3   | A0A1M3CDI3;Q35V81;Q1QPE2;A3WR  | 480   | 1,11    | 0,14114 |
| 0,00E+00 | 0,00E+00 | 9,10E+05 | 1,30E+06 | 0,00E+00 | 2,26E+05 | 2,64E+05 | 0,00E+00 | 0,00E+00 | 0,00E+00 | >tr A0A1Q3K4A6 A0A1Q3K4A6_9BRAD  | Nitrobacter sp. 62-13              | 2-dehydro-3-deoxyphosphoactonate aldolase    | 0         | 6,2134 | 3,46E+07 | 2  | 1 | 1 | 1 | 6,7  | 21,842 | A0A1Q3K4A6;Q35R80;Q1QMJ3;A0 | A0A1Q3K4A6;Q35R80;Q1QMJ3;A0A1 | 481                            | 1,89  | 0,14287 |         |
| 4,73E+07 | 6,71E+07 | 4,02E+07 | 5,15E+07 | 6,02E+07 | 6,41E+05 | 5,74E+05 | 2,62E+05 | 5,12E+05 | 6,42E+05 | >tr A0A1V4I042 A0A1V4I042_NITVU  | Nitrobacter vulgaris               | Elongation factor Tu (Fragment)              | 0         | 123,49 | 1,70E+08 | 8  | 1 | 1 | 1 | 5    | 4,1    | 42,833                      | A0A1V4I042;Q35SW8;Q1QN32;A3   | A0A1V4I042;Q35SW8;Q1QN32;A3WV  | 482   | 1,05    | #ZAH!   |
| 7,04E+07 | 1,22E+08 | 6,36E+07 | 9,54E+07 | 1,13E+08 | 0,00E+00 | 0,00E+00 | 0,00E+00 | 0,00E+00 | 0,00E+00 | >ssp Q1QQR2 MDH_NITXH            | Nitrobacter hamburgensis (strain   | Malate dehydrogenase                         | 0         | 7,6688 | 1,87E+08 | 5  | 2 | 1 | 1 | 2    | 9,9    | 34,062                      | Q1QQR2;A0A1M3CD56             | Q1QQR2;A0A1M3CD56              | 483   | #ZAH!   | 0,00000 |
| 6,31E+05 | 1,05E+06 | 4,13E+05 | 7,19E+05 | 2,19E+05 | 0,00E+00 | 0,00E+00 | 0,00E+00 | 0,00E+00 | 0,00E+00 | >ssp Q35TV0 JSD1_NITWN           | Nitrobacter winogradskyi (strain A | 30S ribosomal protein S21                    | 0         | 6,7697 | 0,00E+00 | 1  | 1 | 1 | 1 | 6    | 9,5    | 10,643                      | Q35TV0;Q1QNY6;A3WVG5;A0A1V4   | Q35TV0;Q1QNY6;A3WVG5;A0A1V4I0K | 484   | #ZAH!   | #ZAH!   |
| 4,59E+06 | 5,08E+06 | 3,62E+06 | 3,69E+06 | 4,02E+06 | 1,44E+06 | 2,31E+04 | 8,59E+05 | 9,42E+05 | 1,23E+06 | >tr Q35TQ0 Q35TQ0_NITWN          | Nitrobacter winogradskyi (strain A | Xanthine dehydrogenase, molybdenum bindin    | 0         | 14,52  | 3,15E+08 | 7  | 1 | 1 | 1 | 6    | 1,7    | 81,555                      | Q35TQ0;A0A1V4I0F2;A0A1M3CE1   | Q35TQ0;A0A1V4I0F2;A0A1M3CE10;Q | 485   | 0,33    | 0,00592 |
| 5,45E+06 | 9,95E+06 | 9,98E+06 | 4,18E+06 | 8,46E+06 | 1,53E+05 | 0,00E+00 | 0,00E+00 | 1,23E+06 | 0,00E+00 | >ssp Q1QN45 RL7_NITXH            | Nitrobacter hamburgensis (strain   | 50S ribosomal protein L7/L12                 | 0         | 7,6835 | 7,17E+06 | 2  | 1 | 1 | 1 | 6    | 14,5   | 12,715                      | Q1QN45;Q35SY1;A0A1V4H250;A0   | Q1QN45;Q35SY1;A0A1V4H250;A0A1Q | 486   | -0,46   | #ZAH!   |
| 3,60E+07 | 4,28E+07 | 4,58E+07 | 2,32E+07 | 0,00E+00 | 0,00E+00 | 0,00E+00 | 0,00E+00 | 0,00E+00 | 8,80E+05 | >tr A3WVK8 A3WVK8_9BRAD          | Nitrobacter sp. Nb-311A            | Isocitrate dehydrogenase [NADP]              | 0,0070053 | 5,996  | 1,91E+08 | 3  | 2 | 1 | 1 | 3    | 5,4    | 45,441                      | A3WVK8;A0A1V4H212;A0A1M3CK    | A3WVK8;A0A1V4H212;A0A1M3CKI5   | 487   | 3,22    | 0,34665 |
| 2,39E+06 | 3,59E+06 | 3,27E+06 | 2,21E+06 | 1,85E+06 | 0,00E+00 | 7,96E+05 | 3,27E+05 | 4,16E+05 | 4,05E+05 | >tr A0A1Q3K9S1 A0A1Q3K9S1_9BRAD  | Nitrobacter sp. 62-13              | 30S ribosomal protein S1 (Fragment)          | 0,0084317 | 5,9198 | 4,86E+07 | 1  | 1 | 1 | 1 | 3    | 5,4    | 50,685                      | A0A1Q3K9S1;A0A1M3CLH8;Q1QR    | A0A1Q3K9S1;A0A1M3CLH8;Q1QR73;C | 490   | #ZAH!   | #ZAH!   |
| 1,39E+06 | 3,97E+04 | 6,25E+06 | 5,63E+05 | 0,00E+00 | 1,64E+05 | 2,09E+05 | 9,18E+04 | 1,82E+05 | 1,44E+05 | >tr A0A1N6PVP3 A0A1N6PVP3_9RHOB  | Paracoccus thiocyanatus            | Acyl-CoA dehydrogenase                       | 0         | 16,884 | 1,40E+08 | 6  | 1 | 1 | 1 | 2    | 4,8    | 42,926                      | A0A1N6PVP3;A0A1M7FHK9         | A0A1N6PVP3;A0A1M7FHK9          | 491   | 2,97    | 0,00004 |
| 1,14E+07 | 1,53E+07 | 1,17E+07 | 1,11E+07 | 1,32E+07 | 6,11E+05 | 5,20E+05 | 3,71E+05 | 5,07E+05 | 5,62E+05 | >tr A0A1M7H232 A0A1M7H232_9RHOB  | Paracoccus solventivorans          | Thioredoxin                                  | 0         | 6,4997 | 1,80E+07 | 1  | 1 | 1 | 1 | 1    | 15,1   | 11,427                      | A0A1M7H232                    | A0A1M7H232                     | 492   | #ZAH!   | #ZAH!   |
| 7,11E+06 | 5,31E+06 | 1,20E+07 | 1,57E+07 | 9,83E+06 | 0,00E+00 | 0,00E+00 | 2,05E+05 | 2,60E+05 | 3,34E+05 | >tr A0A1M7IQX5 A0A1M7IQX5_9RHOB  | Paracoccus solventivorans          | Propionyl-CoA carboxylase carboxyltransferas | 0,0070796 | 6,0104 | 2,00E+07 | 1  | 2 | 1 | 1 | 1    | 6,1    | 56,115                      | A0A1M7IQX5                    | A0A1M7IQX5                     | 493   | #ZAH!   | #ZAH!   |
| 8,83E+05 | 5,61E+06 | 3,09E+06 | 6,67E+05 | 1,05E+06 | 0,00E+00 | 1,26E+05 | 0,00E+00 | 0,00E+00 | 0,00E+00 | >tr A0A1N6JAL3 A0A1N6JAL3_9PROT  | Nitrosomonas cryotolerans ATCC     | 60 kDa chaperonin                            | 0         | 12,103 | 2,14E+07 | 2  | 6 | 1 | 1 | 1    | 11,6   | 57,812                      | A0A1N6JAL3;A0A114MVZ3;A0A1I3  | A0A1N6JAL3;A0A114MVZ3;A0A1I3W4 | 494   | 2,23    | 0,34690 |
| 9,54E+06 | 8,83E+06 | 8,83E+06 | 7,49E+06 | 2,07E+06 | 0,00E+00 | 0,00E+00 | 0,00E+00 | 0,00E+00 | 0,00E+00 | >tr A0A1N7KYB9 A0A1N7KYB9_9RHOB  | Paracoccus saliphilus              | Isocitrate dehydrogenase [NADP]              | 0         | 25,848 | 2,89E+08 | 2  | 3 | 3 | 1 | 8    | 8,2    | 45,153                      | A0A1N7KYB9;A0A099G1N9;A0A2    | A0A1N7KYB9;A0A099G1N9          | 495   | #ZAH!   | #ZAH!   |
| 1,95E+06 | 1,31E+06 | 1,24E+06 | 9,77E+05 | 1,12E+06 | 2,06E+05 | 0,00E+00 | 1,46E+05 | 1,41E+05 | 2,02E+05 | >tr A0A1Q3K274 A0A1Q3K274_9BRAD  | Nitrobacter sp. 62-13              | Methylmalonyl-CoA mutase                     | 0         | 12,013 | 5,13E+07 | 1  | 2 | 2 | 1 | 1    | 3      | 78,118                      | A0A1Q3K274                    | A0A1Q3K274                     | 497   | 0,15    | #ZAH!   |
| 1,02E+06 | 1,30E+06 | 1,16E+06 | 1,13E+06 | 2,26E+05 | 1,82E+05 | 5,30E+05 | 2,63E+05 | 3,85E+05 | 5,20E+05 | >tr Q1QHC4 Q1QHC4_NITXH          | Nitrobacter hamburgensis (strain   | Amino acid/amide ABC transporter substrate   | 0,0018622 | 6,0957 | 1,04E+08 | 3  | 1 | 1 | 1 | 2    | 3,2    | 43,06                       | Q1QHC4;A0A1Q3K943             | Q1QHC4;A0A1Q3K943              | 498   | 0,29    | 0,00060 |
| 1,85E+06 | 3,66E+06 | 3,67E+06 | 0,00E+00 | 1,10E+06 | 4,35E+06 | 5,91E+06 | 1,10E+06 | 3,70E+06 | 0,00E+00 | >tr Q1QLM9 Q1QLM9_NITXH          | Nitrobacter hamburgensis (strain   | Amino acid ABC transporter substrate-binding | 0,0068493 | 5,9468 | 7,11E+08 | 3  | 1 | 1 | 1 | 3    | 3,2    | 37,426                      | Q1QLM9;A0A1Q3KC28;Q35SF1      | Q1QLM9;A0A1Q3KC28;Q35SF1       | 499   | 0,20    | #ZAH!   |
| 0,00E+00 | 0,00E+00 | 0,00E+00 | 0,00E+00 | 1,99E+07 | 4,54E+06 | 4,72E+06 | 1,28E+06 | 3,76E+06 | 3,45E+06 | >tr A0A1V0GRH2 A0A1V0GRH2_9RHOB  | Paracoccus yeei                    | PQQ-dependent dehydrogenase, methanol/e      | 0         | 27,795 | 6,73E+08 | 28 | 1 | 1 | 1 | 1    | 2      | 65,575                      | A0A1V0GRH2;A0A238VH54         | A0A1V0GRH2;A0A238VH54          | 500   | -0,79   | 0,00041 |
| 4,33E+06 | 5,16E+06 | 5,82E+06 | 5,74E+06 | 4,35E+06 | 1,25E+05 | 0,00E+00 | 9,32E+04 | 1,23E+05 | 2,07E+05 | >tr A0A1V0GSX6 A0A1V0GSX6_9RHOB  | Paracoccus yeei                    | Ribulose-phosphate 3-epimerase               | 0,001845  | 6,0786 | 2,19E+07 | 4  | 1 | 1 | 1 | 1    | 2,8    | 24,388                      | A0A1V0GSX6                    | A0A1V0GSX6                     | 501   | 2,80    | 0,01092 |
| 2,92E+05 | 4,49E+05 | 3,39E+05 | 3,46E+05 | 2,48E+05 | 3,17E+08 | 2,24E+08 | 1,88E+08 | 3,31E+06 | 3,91E+07 | >tr A0A1V4AX1 A0A1V4AX1_9BACT    | Candidatus Brocadia carolinensis   | Uncharacterized protein (Fragment)           | 0,0071813 | 6,0269 | 7,71E+08 | 3  | 1 | 1 | 1 | 6    | 47,1   | 4,0808                      | A0A1V4AX1;A0A1V4AU41;A0A1V    | A0A1V4AX1;A0A1V4AU41;A0A1V4AS  | 502   | #ZAH!   | #ZAH!   |
| 3,94E+07 | 5,44E+07 | 4,04E+07 | 3,99E+07 | 5,46E+07 | 1,73E+06 | 0,00E+00 | 3,07E+05 | 0,00E+00 | 0,00E+00 | >tr A0A1V6LZP0 A0A1V6LZP0_9BACT  | Candidatus Brocadia sapporoensis   | 10 kDa chaperonin                            | 0,0083056 | 5,8953 | 1,01E+08 | 3  | 1 | 1 | 1 | 3    | 12,8   | 10,32                       | A0A1V6LZP0;A0A1V4ATP9;A0A1V   | A0A1V6LZP0;A0A1V4ATP9;A0A1V4AQ | 503   | 3,16    | 0,26001 |
| 1,78E+05 | 2,04E+05 | 2,19E+05 | 1,75E+05 | 8,51E+04 | 0,00E+00 | 0,00E+00 | 0,00E+00 | 0,00E+00 | 0,00E+00 | >tr A0A1V4HXJ7 A0A1V4HXJ7_NITVU  | Nitrobacter vulgaris               | Methylmalonyl-CoA mutase                     | 0,0083472 | 5,9062 | 0,00E+00 | 1  | 2 | 1 | 1 | 6    | 3,2    | 78,483                      | A0A1V4HXJ7;Q35QE9;A3WXB4;Q1   | A0A1V4HXJ7;Q35QE9;A3WXB4;Q1Q   | 506   | #ZAH!   | #ZAH!   |
| 1,42E+06 | 1,47E+06 | 1,01E+06 | 1,98E+06 | 8,78E+05 | 0,00E+00 | 0,00E+00 | 0,00E+00 | 0,00E+00 | 0,00E+00 | >tr A0A1V6M116 A0A1V6M116_9BACT  | Candidatus Brocadia sapporoensis   | Transcription elongation factor GreAB        | 0         | 6,3093 | 5,65E+06 | 1  | 1 | 1 | 1 | 1    | 11,6   | 15,41                       | A0A1V6M116                    | A0A1V6M116                     | 509   | #ZAH!   | #ZAH!   |
| 1,83E+06 | 2,37E+06 | 2,09E+06 | 2,57E+06 | 1,70E+06 | 0,00E+00 | 0,00E+00 | 0,00E+00 | 0,00E+00 | 0,00E+00 | >tr A0A1W1HQ51 A0A1W1HQ51_9BACT  | Nitrospira sp. ND1                 | Uncharacterized protein                      | 0         | 72,568 | 0,00E+00 | 1  | 1 | 1 | 1 | 2    | 3,4    | 28,74                       | A0A1W1HQ51;A0A1W9GE94         | A0A1W1HQ51;A0A1W9GE94          | 510   | #ZAH!   | #ZAH!   |
| 2,86E+07 | 3,03E+07 | 8,26E+06 | 1,72E+07 | 2,05E+06 | 2,10E+06 | 1,17E+06 | 7,39E+05 | 0,00E+00 | 1,17E+06 | >tr D8PCX8 D8PCX8_9BACT          | Nitrospira defluvi                 | 30S ribosomal protein S11                    | 0,0018692 | 6,0991 | 6,64E+07 | 1  | 2 | 1 | 1 | 2    | 10,2   | 13,701                      | D8PCX8;A0A1W1HQ20             | D8PCX8;A0A1W1HQ20              | 511   | 0,18    | 0,01614 |
| 1,94E+06 | 3,90E+06 | 2,85E+06 | 3,02E+06 | 2,16E+06 | 2,34E+06 | 1,97E+06 | 2,19E+05 | 0,00E+00 | 5,60E+05 | >tr D8PCU0 D8PCU0_9BACT          | Nitrospira defluvi                 | Transcription termination/antitermination pr | 0         | 128,44 | 3,63E+08 | 14 | 2 | 1 | 1 | 13   | 21,2   | 19,764                      | D8PCU0;A0A1W1HR32;A0A256W     | D8PCU0;A0A1W1HR32;A0A256WY33;  | 512   | 2,79    | 0,06499 |
| 1,83E+08 | 1,36E+08 | 1,27E+08 | 1,34E+08 | 1,29E+08 | 0,00E+00 | 2,40E+05 | 2,83E+05 | 2,56E+05 | 3,78E+05 | >tr D8PCT7 D8PCT7_9BACT          | Nitrospira defluvi                 | Elongation factor Tu                         | 0         | 6,56   | 3,80E+07 | 3  | 3 | 1 | 1 | 2    | 11     | 43,699                      | D8PCT7;A0A1W1HR49             | D8PCT7;A0A1W1HR49              | 513   | -1,22   | #ZAH!   |
| 1,97E+07 | 1,49E+07 | 1,64E+07 | 4,99E+07 | 2,01E+06 | 1,90E+06 | 1,14E+06 | 1,21E+06 | 1,15E+06 | 8,41E+05 | >tr D8P7E8 D8P7E8_9BACT          | Nitrospira defluvi                 | Beta sliding clamp                           | 0         | 52,525 | 1,59E+08 | 8  | 1 | 1 | 1 | 2    | 4,3    | 40,863                      | D8P7E8;A0A1W1HV35             | D8P7E8;A0A1W1HV35              | 514   | -1,88   | #ZAH!   |
| 1,64E+05 | 1,99E+05 | 1,54E+05 | 1,75E+05 | 1,53E+05 | 2,56E+06 | 2,52E+06 | 0,00E+00 | 3,00E+05 | 3,00E+05 | >tr D8PIC8 D8PIC8_9BACT          | Nitrospira defluvi                 | Putative RNA-binding protein RbpA            | 0         | 209,28 | 1,33E+08 | 5  | 3 | 1 | 1 | 2    | 36,1   | 11,324                      | D8PIC8;A0A1W1HY53             | D8PIC8;A0A1W1HY53              | 516   | 1,58    | 0,09478 |
| 1,02E+06 | 1,40E+06 | 9,32E+05 | 2,29E+06 | 4,23E+05 | 1,96E+05 | 2,49E+05 | 6,31E+04 | 9,52E+04 | 1,06E+05 | >tr D8PIB4 D8PIB4_9BACT          | Nitrospira defluvi                 | Uncharacterized protein                      | 0,0084034 | 5,9145 | 1,23E+08 | 1  | 1 | 1 | 1 | 2    | 0,7    | 178,82                      | D8PIB4;A0A1W1HY72             | D8PIB4;A0A1W1HY72              | 517   | 0,28    | 0,00349 |
| 2,15E+06 | 1,94E+06 | 2,33E+06 | 1,64E+06 | 1,88E+06 | 0,00E+00 | 0,00E+00 | 0,00E+00 | 0,00E+00 | 0,00E+00 | >tr A0A1W1HYK3 A0A1W1HYK3_9BACT  | Nitrospira sp. ND1                 | Uncharacterized protein                      | 0         | 7,7274 | 3,13E+07 | 1  | 4 | 1 | 1 | 1    | 42,7   | 15,997                      | A0A1W1HYK3                    | A0A1W1HYK3                     | 519   | #ZAH!   | #ZAH!   |
| 2,57E+07 | 2,46E+07 | 2,24E+07 |          |          |          |          |          |          |          |                                  |                                    |                                              |           |        |          |    |   |   |   |      |        |                             |                               |                                |       |         |         |

|          |          |          |          |          |          |          |          |          |          |                                 |                               |                                               |   |        |          |    |   |   |   |   |    |        |                             |                                |                                 |                      |         |         |         |
|----------|----------|----------|----------|----------|----------|----------|----------|----------|----------|---------------------------------|-------------------------------|-----------------------------------------------|---|--------|----------|----|---|---|---|---|----|--------|-----------------------------|--------------------------------|---------------------------------|----------------------|---------|---------|---------|
| 0.00E+00 | 0.00E+00 | 0.00E+00 | 0.00E+00 | 0.00E+00 | 1.73E+05 | 4.27E+05 | 0.00E+00 | 0.00E+00 | 0.00E+00 | >tr A0A054LG89 A0A054LG89_9BACT | Candidatus Nitrospira nitrosa | Uncharacterized protein                       | 0 | 15,415 | 1.42E+08 | 10 | 2 | 2 | 2 | 2 | 6  | 25.4   | 14,42                       | A0A054LG89;A0A256X1N2;A0A1W    | A0A054LG89;A0A256X1N2;A0A1W9Hf  | 164                  | 4.83    | 0.18965 |         |
| 0.00E+00 | 2.50E+05 | 2.00E+05 | 2.20E+05 | 1.98E+05 | 3.93E+05 | 3.54E+05 | 3.83E+05 | 2.80E+05 | 2.77E+05 | >tr A0A256X0N8 A0A256X0N8_9BACT | Nitrospira sp. UW-LDO-01      | Isocitrate dehydrogenase (NADP(+))            | 0 | 19,833 | 1.16E+08 | 2  | 2 | 2 | 2 | 2 | 14 | 8.47   | A0A256X0N8;A0A054L135;A0A1W | A0A256X0N8;A0A054L135;A0A1W9G6 | 166                             | -1.21                | 0.00000 |         |         |
| 1.73E+06 | 2.24E+06 | 1.74E+06 | 1.75E+06 | 1.96E+06 | 0.00E+00 | 3.11E+06 | 1.49E+06 | 1.71E+06 | 0.00E+00 | >tr D8P754 D8P754_9BACT         | Nitrospira defluvi            | Uncharacterized protein                       | 0 | 34,869 | 1.24E+09 | 5  | 2 | 2 | 2 | 2 | 6  | 26.8   | 8,2885                      | D8P754;A0A1W1HWW8;A0A136J      | A0A1W1HWW8;A0A136J7Y2;A         | 184                  | 5.26    | 0.06318 |         |
| 8.60E+06 | 8.20E+06 | 3.17E+06 | 4.16E+06 | 3.77E+06 | 3.71E+06 | 4.37E+06 | 9.12E+05 | 2.10E+06 | 3.19E+06 | >tr D8PAF3 D8PAF3_9BACT         | Nitrospira defluvi            | Uncharacterized protein                       | 0 | 13,864 | 8.82E+08 | 13 | 2 | 2 | 2 | 2 | 4  | 7.4    | 19,505                      | D8PAF3;A0A1W1HTV4;A0A136XJY    | A0A1W1HTV4;A0A136XJY2;A         | 188                  | 2.05    | 0.00160 |         |
| 4.96E+05 | 5.84E+05 | 4.35E+05 | 4.05E+05 | 4.63E+05 | 4.32E+05 | 7.02E+05 | 0.00E+00 | 0.00E+00 | 0.00E+00 | >tr A0A136K854 A0A136K854_9BACT | Nitrospira sp. OLb3           | DNA-directed RNA polymerase subunit alpha     | 0 | 11,254 | 3.76E+07 | 2  | 2 | 2 | 2 | 3 | 6  | 36,512 | A0A136K854;D8PCY0;A0A1W1HRE | A0A136K854;D8PCY0;A0A1W1HRE6   | 193                             | -0.79                | #ZAH!   |         |         |
| 9.97E+06 | 9.33E+06 | 6.76E+06 | 7.80E+06 | 7.66E+06 | 5.78E+05 | 3.66E+05 | 0.00E+00 | 0.00E+00 | 6.68E+05 | >tr A0A136KBG3 A0A136KBG3_9BACT | Nitrospira sp. OLb3           | Putative RNA-binding protein RbpA             | 0 | 13,647 | 2.04E+08 | 3  | 3 | 2 | 2 | 2 | 6  | 35.5   | 11,445                      | A0A136KBG3;A0A1W9J834;A0A1     | A0A136KBG3;A0A1W9J834           | 196                  | 4.33    | 0.05088 |         |
| 5.02E+05 | 5.56E+05 | 1.71E+06 | 3.04E+06 | 1.59E+06 | 2.34E+06 | 2.23E+06 | 0.00E+00 | 1.30E+06 | 2.04E+06 | >tr A0A136KDL4 A0A136KDL4_9BACT | Nitrospira sp. OLb3           | Cytochrome c peroxidase                       | 0 | 12,192 | 3.48E+08 | 8  | 2 | 2 | 2 | 2 | 4  | 4.8    | 54,114                      | A0A136KDL4;A3WXM5;A0A0K2GE     | A0A136KDL4;A3WXM5;A0A0K2GE90;A  | 198                  | -0.40   | #ZAH!   |         |
| 3.93E+06 | 4.71E+06 | 2.81E+06 | 4.64E+06 | 2.87E+06 | 0.00E+00 | 4.32E+04 | 0.00E+00 | 1.06E+05 | 1.40E+05 | >tr A0A136KDZ6 A0A136KDZ6_9BACT | Nitrospira sp. OLb3           | Peptidyl-prolyl cis-trans isomerase           | 0 | 19,598 | 6.49E+08 | 15 | 2 | 2 | 2 | 2 | 14 | 15.7   | 23,224                      | A0A136KDZ6;A0A1W9GPF4;A0A1     | A0A136KDZ6;A0A1W9GPF4;A0A1W9J   | 199                  | 7.22    | 0.07494 |         |
| 1.02E+06 | 2.28E+06 | 9.28E+05 | 3.32E+06 | 2.28E+06 | 2.50E+05 | 7.91E+05 | 3.78E+05 | 7.08E+05 | 1.10E+06 | >tr A0A1E4DGY7 A0A1E4DGY7_9BACT | Nitrospira sp. SCN 59-13      | Serine protease                               | 0 | 37,664 | 2.13E+08 | 10 | 2 | 2 | 2 | 2 | 6  | 8.1    | 53,262                      | A0A1E4DGY7;A0A1W1I0C2;A0A1     | A0A1E4DGY7;A0A1W1I0C2;A0A177Q   | 210                  | 1.20    | 0.00276 |         |
| 2.06E+06 | 2.81E+06 | 1.25E+06 | 1.01E+06 | 1.25E+06 | 3.44E+06 | 2.55E+06 | 1.01E+06 | 1.16E+06 | 4.57E+05 | >tr A0A238WGN0 A0A238WGN0_9RHOB | Paracoccus sediminis          | NitT/TauT family transport system substrate-t | 0 | 13,978 | 2.06E+08 | 8  | 2 | 2 | 2 | 2 | 17 | 7.7    | 34,84                       | A0A238WGN0;A0A1W1KLG7;A0A1     | A0A238WGN0;A0A1W1KLG7;A0A119B   | 219                  | 0.24    | 0.01390 |         |
| 7.90E+05 | 9.21E+05 | 6.83E+05 | 9.39E+05 | 6.40E+05 | 0.00E+00 | 0.00E+00 | 3.43E+05 | 4.46E+05 | 2.72E+05 | >tr A0A1678KE7 A0A1678KE7_9RHOB | Paracoccus isopora            | ATP synthase subunit alpha                    | 0 | 96,726 | 1.49E+08 | 2  | 2 | 2 | 2 | 2 | 33 | 10.6   | 55,101                      | A0A1678KE7;A0A2E3CCH9;A0A2D    | A0A1678KE7;A0A2E3CCH9;A0A2D8X2  | 238                  | 2.21    | 0.04795 |         |
| 1.78E+06 | 1.71E+06 | 1.44E+06 | 1.90E+06 | 1.35E+06 | 2.16E+07 | 1.84E+07 | 8.86E+06 | 1.87E+07 | 2.50E+07 | >tr A0A14UY44 A0A14UY44_9PROT   | Nitrosomonas nitrosa          | 30S ribosomal protein S7                      | 0 | 161,78 | 8.85E+08 | 11 | 2 | 2 | 2 | 2 | 26 | 16     | 17,956                      | A0A14UY44;A0A1H3NRM1;A0A1      | A0A14UY44;A0A1H3NRM1;A0A1H3K    | 249                  | -1.45   | 0.00013 |         |
| 7.90E+05 | 1.00E+06 | 9.56E+05 | 1.41E+06 | 6.11E+05 | 5.96E+05 | 5.03E+05 | 3.66E+05 | 3.06E+05 | 3.53E+05 | >tr A0A147AA1 A0A147AA1_9PROT   | Nitrosomonas nitrosa          | Ribose-phosphate pyrophosphokinase            | 0 | 11,567 | 3.89E+07 | 2  | 2 | 2 | 2 | 2 | 27 | 7.9    | 34,799                      | A0A147AA1;A0A1H3HK92;A0A1Q     | A0A147AA1;A0A1H3HK92;A0A110EK8  | 261                  | -2.18   | #ZAH!   |         |
| 3.67E+07 | 5.26E+07 | 2.43E+07 | 4.07E+07 | 2.55E+07 | 3.92E+06 | 5.00E+05 | 2.26E+06 | 3.35E+06 | 3.42E+06 | >tr A0A1H8EX84 A0A1H8EX84_9RHOB | Paracoccus alcaliphilus       | Amino acid ABC transporter substrate-binding  | 0 | 70,212 | 3.53E+08 | 8  | 2 | 2 | 2 | 2 | 15 | 9.9    | 29,44                       | A0A1H8EX84;A0A2D2COL2;A0A2H    | A0A1H8EX84;A0A2D2COL2;A0A2H5F3  | 275                  | -0.64   | 0.00228 |         |
| 0.00E+00 | 0.00E+00 | 0.00E+00 | 0.00E+00 | 0.00E+00 | 3.53E+05 | 3.42E+05 | 3.66E+05 | 5.91E+05 | 5.59E+05 | >tr A0A238Y2Z2 A0A238Y2Z2_9RHOB | Paracoccus sediminis          | Aconitate hydratase                           | 0 | 16,898 | 1.09E+08 | 14 | 2 | 2 | 2 | 2 | 40 | 3.5    | 99,539                      | A0A238Y2Z2;A0A1H8GA10;Q3SVV    | A0A238Y2Z2;A0A1H8GA10;Q3SVV1;Q  | 276                  | -1.75   | 0.00004 |         |
| 8.19E+04 | 6.92E+04 | 5.31E+04 | 0.00E+00 | 5.38E+04 | 1.90E+06 | 1.46E+06 | 1.39E+05 | 2.24E+06 | 1.80E+06 | >tr A0A1H8KNX3 A0A1H8KNX3_9RHOB | Paracoccus alcaliphilus       | MoXr-like ATPase                              | 0 | 11,778 | 2.26E+08 | 2  | 2 | 2 | 2 | 2 | 29 | 10.1   | 32,827                      | A0A1H8KNX3;A1AZG6;A0A2D2CQ0    | A0A1H8KNX3;A1AZG6;A0A2D2CQ07;A  | 281                  | -1.47   | 0.00324 |         |
| 3.58E+05 | 9.14E+05 | 6.19E+05 | 9.33E+06 | 1.65E+05 | 5.88E+06 | 6.50E+06 | 3.90E+06 | 5.86E+06 | 7.69E+06 | >tr A0A1VOGXN9 A0A1VOGXN9_9RHOB | Paracoccus yeei               | Nitrous-oxide reductase                       | 0 | 73,05  | 1.67E+09 | 22 | 2 | 2 | 2 | 2 | 4  | 70,504 | A0A1VOGXN9;A0A1H3AAL6;A0A2D | A0A1VOGXN9;A0A1H3AAL6;A0A2D2C2 | 299                             | -0.42                | 0.00001 |         |         |
| 3.71E+05 | 6.47E+05 | 7.94E+05 | 0.00E+00 | 4.99E+05 | 3.58E+05 | 1.75E+05 | 2.41E+05 | 7.13E+05 | 5.67E+05 | >tr A0A2H5EZC3 A0A2H5EZC3_9RHOB | Paracoccus zhejiangensis      | Polyribonucleotide nucleotidyltransferase     | 0 | 14,262 | 8.23E+07 | 10 | 2 | 2 | 2 | 2 | 17 | 4.8    | 77,107                      | A0A2H5EZC3;A0A113B5N7;SSYFW    | A0A2H5EZC3;A0A113B5N7;SSYFW1;A0 | 300                  | -3.15   | 0.00357 |         |
| 7.13E+05 | 3.64E+05 | 0.00E+00 | 5.30E+05 | 0.00E+00 | 1.35E+08 | 1.81E+08 | 9.55E+07 | 1.20E+08 | 1.15E+08 | >tr A0A13IIN1 A0A13IIN1_9PROT   | Nitrosomonas sp. Nm34         | Nitrosocyanin                                 | 0 | 323,31 | 1.54E+10 | 69 | 2 | 2 | 2 | 2 | 4  | 18.2   | 16,298                      | A0A13IIN1;A0A114NZ49;A0A0F7K   | A0A13IIN1;A0A114NZ49;A0A0F7KKN5 | 304                  | 0.99    | 0.00002 |         |
| 1.96E+06 | 2.70E+06 | 0.00E+00 | >tr A0A14KSYS A0A14KSYS_9PROT   | Nitrosomonas nitrosa          | PAS domain S-box-containing protein           | 0 | 14,528 | 9.42E+07 | 7  | 2 | 2 | 2 | 2 | 15 | 17.3   | 17,419                      | A0A14KSYS;A0A1H9S0K9;F9ZGQ1    | A0A14KSYS;A0A1H9S0K9;F9ZGQ1;F8C | 306                  | #ZAH!   | 0.00000 |         |
| 0.00E+00 | 0.00E+00 | 0.00E+00 | 0.00E+00 | 0.00E+00 | 1.26E+06 | 1.35E+06 | 7.16E+05 | 1.27E+06 | 1.27E+06 | >tr A0A14KYU4 A0A14KYU4_9PROT   | Nitrosomonas nitrosa          | protein HflK                                  | 0 | 58,503 | 1.81E+08 | 5  | 2 | 2 | 2 | 2 | 7  | 7.4    | 44,408                      | A0A14KYU4;A0A1H3FM86           | A0A14KYU4;A0A1H3FM86            | 310                  | -1.55   | 0.00001 |         |
| 8.25E+05 | 1.46E+06 | 3.41E+06 | 1.15E+06 | 1.17E+06 | 7.32E+05 | 9.24E+05 | 7.18E+05 | 7.90E+05 | 7.25E+05 | >tr A0A14L308 A0A14L308_9PROT   | Nitrosomonas nitrosa          | ATP-dependent zinc metalloprotease FtsH       | 0 | 25,112 | 1.33E+08 | 2  | 2 | 2 | 2 | 2 | 29 | 5.2    | 70,567                      | A0A14L308;A0A114MGZ7;A0A113J   | A0A14L308;A0A114MGZ7;A0A113J4M  | 315                  | -4.74   | #ZAH!   |         |
| 1.37E+07 | 1.74E+07 | 1.42E+07 | 2.02E+07 | 1.68E+07 | 4.98E+05 | 2.11E+05 | 2.87E+05 | 1.65E+05 | 3.75E+05 | >tr A0A14L4C3 A0A14L4C3_9PROT   | Nitrosomonas nitrosa          | Trigger factor                                | 0 | 11,941 | 5.29E+07 | 3  | 2 | 2 | 2 | 2 | 2  | 7.1    | 49,671                      | A0A14L4C3;A0A1H3HQV8           | A0A14L4C3;A0A1H3HQV8            | 319                  | -1.86   | #ZAH!   |         |
| 4.22E+05 | 6.37E+05 | 5.25E+05 | 4.43E+05 | 2.16E+05 | 5.39E+05 | 2.14E+05 | 0.00E+00 | 8.45E+04 | 0.00E+00 | >tr A0A14LC70 A0A14LC70_9PROT   | Nitrosomonas nitrosa          | Putative glucose-6-phosphate 1-epimerase      | 0 | 49,137 | 5.53E+08 | 13 | 2 | 2 | 2 | 2 | 1  | 9      | 32,793                      | A0A14LC70                      | A0A14LC70                       | 322                  | 5.24    | 0.13535 |         |
| 0.00E+00 | 0.00E+00 | 0.00E+00 | 0.00E+00 | 7.02E+04 | 2.01E+05 | 0.00E+00 | 0.00E+00 | 0.00E+00 | 0.00E+00 | >tr A0A14LCL8 A0A14LCL8_9PROT   | Nitrosomonas nitrosa          | Uncharacterized protein                       | 0 | 12,996 | 4.68E+07 | 2  | 2 | 2 | 2 | 2 | 1  | 16.1   | 22,346                      | A0A14LCL8                      | A0A14LCL8                       | 323                  | 6.26    | #ZAH!   |         |
| 3.02E+05 | 4.84E+05 | 2.78E+05 | 2.29E+05 | 3.93E+05 | 0.00E+00 | 2.57E+05 | 0.00E+00 | 1.28E+05 | 7.27E+04 | >tr A0A14LFK8 A0A14LFK8_9PROT   | Nitrosomonas nitrosa          | Glucose/arabinose dehydrogenase, beta-prop    | 0 | 86,183 | 4.44E+07 | 2  | 2 | 2 | 2 | 2 | 1  | 9.3    | 41,449                      | A0A14LFK8                      | A0A14LFK8                       | 324                  | 2.14    | #ZAH!   |         |
| 1.35E+07 | 1.58E+07 | 1.23E+07 | 1.55E+07 | 1.68E+07 | 0.00E+00 | 0.00E+00 | 0.00E+00 | 1.05E+05 | 0.00E+00 | >tr A0A14LL47 A0A14LL47_9PROT   | Nitrosomonas nitrosa          | Dienealactone hydrolase                       | 0 | 28,146 | 9.65E+07 | 9  | 2 | 2 | 2 | 2 | 1  | 13.5   | 25,78                       | A0A14LL47                      | A0A14LL47                       | 328                  | 6.51    | 0.34705 |         |
| 0.00E+00 | 2.88E+05 | 1.01E+05 | 1.55E+05 | 0.00E+00 | 2.64E+05 | 9.41E+04 | 0.00E+00 | 7.94E+04 | 5.32E+04 | >tr A0A14LLU2 A0A14LLU2_9PROT   | Nitrosomonas nitrosa          | N-acetylneuraminic acid mutarotase            | 0 | 218,64 | 1.90E+08 | 13 | 2 | 2 | 2 | 2 | 1  | 15.5   | 36,257                      | A0A14LLU2                      | A0A14LLU2                       | 329                  | 4.20    | 0.05853 |         |
| 9.08E+06 | 1.14E+07 | 7.82E+06 | 9.06E+06 | 9.10E+06 | 2.60E+08 | 2.73E+08 | 2.44E+08 | 3.28E+08 | 2.74E+08 | >tr A0A14LZ17 A0A14LZ17_9PROT   | Nitrosomonas nitrosa          | CHRD domain-containing protein                | 0 | 32,899 | 1.35E+10 | 15 | 2 | 2 | 2 | 2 | 1  | 21.7   | 18,734                      | A0A14LZ17                      | A0A14LZ17                       | 335                  | 0.48    | 0.00000 |         |
| 1.53E+06 | 3.26E+06 | 3.38E+06 | 1.20E+06 | 2.97E+06 | 4.56E+05 | 6.14E+05 | 2.37E+05 | 5.21E+05 | 7.26E+05 | >tr A0A14MQW9 A0A14MQW9_9PROT   | Nitrosomonas nitrosa          | Uncharacterized protein                       | 0 | 12,737 | 1.66E+08 | 7  | 2 | 2 | 2 | 2 | 2  | 13.4   | 22,388                      | A0A14MQW9;A0A113HT57           | A0A14MQW9;A0A113HT57            | 342                  | 3.58    | 0.00025 |         |
| 9.86E+06 | 1.81E+07 | 1.33E+07 | 1.40E+07 | 4.60E+06 | 0.00E+00 | 0.00E+00 | 9.27E+04 | 0.00E+00 | 0.00E+00 | >tr A0A14N2X8 A0A14N2X8_9PROT   | Nitrosomonas nitrosa          | Glucokinase                                   | 0 | 19,053 | 3.98E+07 | 5  | 2 | 2 | 2 | 2 | 1  | 10.2   | 36,272                      | A0A14N2X8                      | A0A14N2X8                       | 346                  | 5.12    | 0.34706 |         |
| 1.35E+06 | 2.58E+06 | 2.32E+06 | 1.88E+06 | 1.86E+06 | 1.05E+06 | 1.16E+06 | 3.56E+05 | 1.42E+06 | 9.21E+05 | >tr A0A14NDH3 A0A14NDH3_9PROT   | Nitrosomonas nitrosa          | Reactive intermediate/mine deaminase          | 0 | 323,31 | 6.98E+08 | 18 | 2 | 2 | 2 | 2 | 9  | 22.9   | 14,088                      | A0A14NDH3;Q82TN3;Q0AFT1;A0A    | A0A14NDH3;Q82TN3;Q0AFT1;A0A1I0  | 350                  | 4.07    | 0.00055 |         |
| 7.55E+06 | 1.09E+07 | 8.16E+06 | 1.18E+07 | 4.52E+06 | 6.25E+07 | 5.54E+07 | 2.06E+07 | 3.01E+07 | 5.07E+07 | >tr A0A14NHR2 A0A14NHR2_9PROT   | Nitrosomonas nitrosa          | Bacterial nucleoid protein Hbs                | 0 | 323,31 | 1.03E+09 | 16 | 2 | 2 | 2 | 2 | 4  | 30     | 9,1096                      | A0A14NHR2;A0A1H3I0K1;A0A1H3    | A0A14NHR2;A0A1H3I0K1;A0A1H3HV   | 352                  | -0.83   | 0.00055 |         |
| 1.69E+07 | 2.30E+07 | 8.44E+06 | 5.03E+06 | 1.55E+07 | 1.93E+05 | 1.18E+05 | 1.55E+05 | 0.00E+00 | 0.00E+00 | >tr A0A14NQJ8 A0A14NQJ8_9PROT   | Nitrosomonas nitrosa          | Uncharacterized protein                       | 0 | 14,167 | 2.13E+08 | 2  | 2 | 2 | 2 | 2 | 2  | 4      | 8.2                         | 8,8851                         | A0A14NQJ8;A0A1H3I546            | A0A14NQJ8;A0A1H3I546 | 357     | 7.83    | 0.04753 |
| 1.09E+06 | 8.63E+05 | 5.69E+05 | 5.57E+05 | 1.04E+06 | 2.67E+05 | 3.26E+05 | 1.30E+05 | 2.54E+05 | 3.02E+05 | >tr A0A14NY11 A0A14NY11_9PROT   | Nitrosomonas nitrosa          | Probable cytosol aminopeptidase               | 0 | 12,576 | 4.08E+07 | 5  | 2 | 2 | 2 | 2 | 17 | 5.6    | 53,271                      | A0A14NY11;A0A14PHL2;A0A113I    | A0A14NY11;A0A14PHL2;A0A113IUF8  | 363                  | -3.33   | #ZAH!   |         |
| 1.4      |          |          |          |          |          |          |          |          |          |                                 |                               |                                               |   |        |          |    |   |   |   |   |    |        |                             |                                |                                 |                      |         |         |         |

|          |          |          |          |          |          |          |          |          |          |                                     |                                    |                                                |   |        |          |     |    |  |    |  |   |      |        |                              |                                 |                                  |            |         |         |         |
|----------|----------|----------|----------|----------|----------|----------|----------|----------|----------|-------------------------------------|------------------------------------|------------------------------------------------|---|--------|----------|-----|----|--|----|--|---|------|--------|------------------------------|---------------------------------|----------------------------------|------------|---------|---------|---------|
| 9,23E+06 | 4,78E+06 | 1,25E+07 | 4,24E+06 | 4,53E+06 | 9,72E+05 | 1,43E+06 | 2,92E+05 | 1,25E+06 | 8,60E+05 | >tr A0A114R1A5 A0A114R1A5_9PROT     | Nitrosomonas nitrosa               | Pyridoxal phosphate homeostasis protein        | 0 | 323,31 | 3,47E+08 | 11  | 3  |  | 3  |  | 3 |      | 8      | 20,2                         | 26,294                          | A0A114R1A5;A0A114KTR3;A0A113H    | A0A114R1A5 | 418     | 2,19    | 0,00115 |
| 8,61E+06 | 1,17E+07 | 8,08E+06 | 2,07E+07 | 1,33E+07 | 5,92E+06 | 3,93E+06 | 2,98E+06 | 5,16E+06 | 6,35E+06 | >tr A0A114RGD5 A0A114RGD5_9PROT     | Nitrosomonas nitrosa               | Glutamate dehydrogenase                        | 0 | 323,31 | 9,28E+08 | 40  | 3  |  | 3  |  | 3 | 14   | 12,8   | 48,543                       | A0A114RGD5;A0A114T2L4;A0A1H3    | A0A114RGD5;A0A114T2L4;A0A1H3IW3  | 421        | -1,67   | 0,00005 |         |
| 0,00E+00 | 0,00E+00 | 0,00E+00 | 0,00E+00 | 0,00E+00 | 7,14E+05 | 5,81E+05 | 0,00E+00 | 7,67E+04 | 0,00E+00 | >tr A0A114RHL9 A0A114RHL9_9PROT     | Nitrosomonas nitrosa               | Uncharacterized protein                        | 0 | 34,808 | 7,60E+08 | 8   | 3  |  | 3  |  | 3 | 1    | 9,3    | 60,081                       | A0A114RHL9                      | A0A114RHL9                       | 422        | 4,74    | 0,11358 |         |
| 1,13E+05 | 9,48E+04 | 9,45E+04 | 1,20E+05 | 0,00E+00 | 3,99E+05 | 9,26E+05 | 1,20E+05 | 3,80E+05 | 1,02E+05 | >tr A0A114RSA5 A0A114RSA5_9PROT     | Nitrosomonas nitrosa               | Probable glycine dehydrogenase (decarboxyla    | 0 | 23,223 | 6,18E+07 | 7   | 3  |  | 3  |  | 3 | 10   | 10,4   | 53,109                       | A0A114RSA5;A0A114QHC8;A0A113H   | A0A114RSA5                       | 425        | -3,24   | #ZAHLI  |         |
| 2,18E+07 | 2,70E+07 | 2,58E+07 | 3,12E+07 | 2,26E+07 | 8,64E+05 | 8,15E+05 | 3,49E+05 | 3,45E+05 | 7,78E+05 | >tr A0A114RSB1 A0A114RSB1_9PROT     | Nitrosomonas nitrosa               | Polyribonucleotide nucleotidyltransferase      | 0 | 31,994 | 1,07E+08 | 8   | 3  |  | 3  |  | 3 | 19   | 6,4    | 76,886                       | A0A114RSB1;A0A1H3MGY5;A0A11H    | A0A114RSB1                       | 426        | -2,88   | #ZAHLI  |         |
| 5,69E+05 | 6,73E+05 | 6,89E+05 | 6,86E+05 | 8,63E+05 | 3,56E+06 | 1,82E+06 | 7,63E+05 | 2,66E+06 | 2,29E+06 | >tr A0A114STI8 A0A114STI8_9PROT     | Nitrosomonas nitrosa               | OmpA-OmpF porin, OOP family                    | 0 | 54,033 | 9,94E+08 | 11  | 3  |  | 3  |  | 3 | 1    | 17,8   | 25,966                       | A0A114STI8                      | A0A114STI8                       | 444        | 2,43    | 0,00135 |         |
| 0,00E+00 | 0,00E+00 | 0,00E+00 | 0,00E+00 | 0,00E+00 | 1,24E+06 | 1,78E+06 | 1,36E+06 | 1,07E+06 | 8,52E+05 | >tr A0A114SYW0 A0A114SYW0_9PROT     | Nitrosomonas nitrosa               | Uncharacterized protein                        | 0 | 107,4  | 4,61E+08 | 19  | 3  |  | 3  |  | 3 | 1    | 5,5    | 72,973                       | A0A114SYW0                      | A0A114SYW0                       | 447        | -0,11   | 0,00004 |         |
| 3,11E+07 | 5,66E+07 | 8,97E+07 | 2,12E+07 | 4,30E+07 | 1,32E+07 | 9,76E+06 | 7,68E+06 | 1,05E+07 | 1,06E+07 | >tr A0A114TRU7 A0A114TRU7_9PROT     | Nitrosomonas nitrosa               | 50S ribosomal protein L19                      | 0 | 83,126 | 1,36E+09 | 46  | 3  |  | 3  |  | 3 | 19   | 30,2   | 14,591                       | A0A114TRU7;B1Y0H8;A0A10BW03     | A0A114TRU7                       | 450        | 1,46    | 0,00000 |         |
| 4,32E+05 | 3,26E+05 | 4,18E+05 | 5,18E+05 | 4,08E+05 | 7,03E+04 | 9,56E+04 | 0,00E+00 | 0,00E+00 | 1,15E+05 | >tr A0A114U3F4 A0A114U3F4_9PROT     | Nitrosomonas nitrosa               | NAD(P)-dependent dehydrogenase, short-cha      | 0 | 46,23  | 2,18E+08 | 16  | 3  |  | 3  |  | 3 | 1    | 18,5   | 25,39                        | A0A114U3F4                      | A0A114U3F4                       | 460        | 5,57    | 0,04759 |         |
| 4,06E+05 | 3,99E+05 | 3,90E+05 | 3,58E+05 | 3,10E+05 | 6,52E+05 | 5,23E+05 | 1,47E+05 | 3,44E+05 | 4,09E+05 | >tr A0A114UYV9 A0A114UYV9_9PROT     | Nitrosomonas nitrosa               | Elongation factor G                            | 0 | 20,943 | 1,31E+08 | 9   | 3  |  | 3  |  | 3 | 10   | 7,5    | 77,422                       | A0A114UYV9;A0A114TEC4;A0A113H   | A0A114UYV9;A0A114TEC4;A0A113JWC4 | 472        | -0,70   | #ZAHLI  |         |
| 0,00E+00 | 0,00E+00 | 0,00E+00 | 4,47E+06 | 0,00E+00 | 5,81E+06 | 1,31E+07 | 8,70E+06 | 4,83E+06 | 6,11E+06 | >sp Q3SVJ1 ATPB_NITWN               | Nitrobacter winogradskyi (strain A | ATP synthase subunit beta                      | 0 | 323,31 | 3,63E+09 | 16  | 5  |  | 5  |  | 3 | 4    | 15,1   | 50,822                       | Q3SVJ1;Q1QQS8;A3WRA3;A0A1V4     | Q3SVJ1;Q1QQS8;A3WRA3;A0A1V4I26   | 507        | 1,39    | 0,00087 |         |
| 8,16E+05 | 1,35E+06 | 1,03E+06 | 8,95E+05 | 1,27E+06 | 7,23E+05 | 1,14E+06 | 3,59E+05 | 8,28E+05 | 7,02E+05 | >tr A0A11W9GQJ2 A0A11W9GQJ2_9BACT   | Nitrospira sp. SG-bin1             | Molybdopterin synthase sulfur carrier subunit  | 0 | 22,018 | 3,88E+08 | 12  | 3  |  | 3  |  | 3 | 13   | 36,7   | 9,8232                       | A0A11W9GQJ2;D8PE88;A0A256X0N    | A0A11W9GQJ2                      | 540        | 4,30    | 0,00033 |         |
| 1,65E+06 | 1,75E+06 | 0,00E+00 | 1,66E+06 | 1,45E+06 | 2,86E+07 | 2,66E+07 | 1,36E+07 | 2,34E+07 | 2,43E+07 | >tr A0A114V9I7H6 A0A114V9I7H6_9BACT | Nitrospira sp. ST-bin5             | Uncharacterized protein                        | 0 | 323,31 | 4,10E+09 | 31  | 3  |  | 3  |  | 3 | 9    | 23,9   | 31,737                       | A0A114V9I7H6;D8PI81;A0A11W1HY9  | A0A11W9I7H6;D8PI81;A0A1W1HY98    | 551        | 1,54    | 0,00002 |         |
| 3,18E+07 | 3,38E+07 | 2,34E+07 | 2,53E+07 | 1,39E+07 | 2,38E+05 | 1,98E+04 | 0,00E+00 | 6,61E+05 | 2,13E+06 | >sp B1XXY9 CH60_LEPCP               | Leptothrix cholodnii (strain ATCC  | 60 kDa chaperonin                              | 0 | 64,601 | 2,97E+08 | 7   | 8  |  | 5  |  | 3 | 1    | 16,4   | 57,309                       | B1XXY9                          | B1XXY9                           | 575        | 1,17    | 0,16419 |         |
| 4,45E+06 | 3,29E+06 | 2,89E+06 | 3,31E+06 | 3,05E+06 | 6,90E+06 | 7,37E+06 | 1,05E+06 | 6,75E+06 | 9,36E+06 | >tr B1Y7H0 B1Y7H0_LEPCP             | Leptothrix cholodnii (strain ATCC  | Elongation factor Tu                           | 0 | 39,243 | 1,41E+09 | 21  | 4  |  | 3  |  | 3 | 1    | 13,6   | 42,881                       | B1Y7H0                          | B1Y7H0                           | 589        | -0,07   | 0,00194 |         |
| 8,79E+06 | 2,77E+06 | 8,51E+06 | 8,59E+06 | 5,13E+06 | 2,26E+07 | 1,97E+07 | 1,41E+07 | 2,05E+07 | 2,27E+07 | >tr D8PI25 D8PI25_9BACT             | Nitrospira defluvi                 | Metal-binding protein SmbP                     | 0 | 167,77 | 7,41E+09 | 48  | 5  |  | 5  |  | 4 | 4    | 40,7   | 12,027                       | D8PI25;A0A1W1HYF8;A0A136JVQ     | D8PI25;A0A1W1HYF8;A0A136JVQ0     | 187        | 2,69    | 0,00000 |         |
| 0,00E+00 | 0,00E+00 | 0,00E+00 | 0,00E+00 | 0,00E+00 | 3,90E+05 | 5,84E+05 | 6,62E+04 | 3,73E+05 | 3,23E+04 | >tr A0A1136K960 A0A1136K960_9BACT   | Nitrospira sp. OLB3                | 3-oxoacyl-ACP reductase                        | 0 | 124,74 | 6,22E+08 | 16  | 4  |  | 5  |  | 4 | 1    | 20     | 29,179                       | A0A1136K960                     | A0A1136K960                      | 194        | 4,52    | 0,02477 |         |
| 1,64E+06 | 2,38E+06 | 1,72E+06 | 1,40E+06 | 1,86E+06 | 1,75E+06 | 1,07E+06 | 7,10E+05 | 1,56E+06 | 1,87E+06 | >tr A0A114LQ74 A0A114LQ74_9PROT     | Nitrosomonas nitrosa               | Chaperone protein DnaK                         | 0 | 189,7  | 4,75E+08 | 24  | 5  |  | 5  |  | 4 | 17   | 11,2   | 70,259                       | A0A114LQ74;A0A113HHP9;A0A1H3    | A0A114LQ74;A0A113HHP9;A0A1H3LR8  | 331        | -0,08   | 0,00022 |         |
| 6,67E+06 | 8,96E+06 | 6,73E+06 | 0,00E+00 | 5,79E+06 | 1,43E+07 | 1,47E+07 | 6,15E+06 | 1,11E+07 | 1,46E+07 | >tr A0A114LYZ5 A0A114LYZ5_9PROT     | Nitrosomonas nitrosa               | Thioredoxin                                    | 0 | 323,31 | 2,91E+09 | 63  | 4  |  | 4  |  | 4 | 14   | 38     | 12,074                       | A0A114LYZ5;A0A113K5R3;A0A1H3R   | A0A114LYZ5                       | 334        | 3,10    | 0,00008 |         |
| 9,16E+05 | 1,44E+06 | 1,65E+06 | 6,86E+05 | 1,19E+06 | 5,24E+05 | 7,17E+05 | 1,29E+05 | 2,58E+05 | 0,00E+00 | >tr A0A114N348 A0A114N348_9PROT     | Nitrosomonas nitrosa               | Polyketide cyclase / dehydrase and lipid trans | 0 | 34,294 | 3,10E+08 | 11  | 4  |  | 4  |  | 4 | 3    | 27,9   | 19,103                       | A0A114N348;A0A1H3PH93;A0A1G     | A0A114N348                       | 347        | 4,17    | 0,03739 |         |
| 0,00E+00 | 0,00E+00 | 0,00E+00 | 0,00E+00 | 0,00E+00 | 1,29E+06 | 1,82E+05 | 0,00E+00 | 0,00E+00 | 0,00E+00 | >tr A0A114NVP1 A0A114NVP1_9PROT     | Nitrosomonas nitrosa               | Cytochrome P460                                | 0 | 219,76 | 1,03E+09 | 12  | 4  |  | 4  |  | 8 | 29,3 | 19,675 | A0A114NVP1;A0A1G8C1J4;A0A1H3 | A0A114NVP1;A0A1G8C1J4;A0A1H3Q11 | 360                              | 5,96       | 0,27555 |         |         |
| 0,00E+00 | 1,62E+05 | 0,00E+00 | 1,06E+05 | 0,00E+00 | 3,27E+06 | 3,04E+06 | 1,43E+06 | 3,55E+06 | 3,78E+06 | >tr A0A114POQ2 A0A114POQ2_9PROT     | Nitrosomonas nitrosa               | Outer membrane protein (Porin)                 | 0 | 33,599 | 3,35E+08 | 8   | 4  |  | 4  |  | 4 | 4    | 14,1   | 42,445                       | A0A114POQ2;A0A1H3P0B0;A0A1G     | A0A114POQ2                       | 365        | -1,36   | 0,00009 |         |
| 4,74E+05 | 7,08E+05 | 5,89E+05 | 2,75E+05 | 6,00E+05 | 1,85E+06 | 1,55E+06 | 2,34E+06 | 2,72E+06 | 2,24E+06 | >tr A0A114PHA3 A0A114PHA3_9PROT     | Nitrosomonas nitrosa               | Uncharacterized protein                        | 0 | 266,66 | 7,74E+08 | 31  | 4  |  | 4  |  | 4 | 1    | 11,4   | 64,688                       | A0A114PHA3                      | A0A114PHA3                       | 374        | 1,01    | 0,00001 |         |
| 4,78E+06 | 4,78E+06 | 4,63E+06 | 4,03E+06 | 4,65E+06 | 1,28E+06 | 2,43E+06 | 2,70E+05 | 1,52E+06 | 3,04E+06 | >tr A0A114PKQ9 A0A114PKQ9_9PROT     | Nitrosomonas nitrosa               | ATP synthase subunit alpha                     | 0 | 233,99 | 4,08E+08 | 18  | 8  |  | 8  |  | 4 | 3    | 18,9   | 55,566                       | A0A114PKQ9;A0A1H3HC84;A0A1G     | A0A114PKQ9;A0A1H3HC84;A0A1G7Z2   | 382        | -0,62   | 0,00732 |         |
| 0,00E+00 | 6,06E+05 | 0,00E+00 | 2,20E+06 | >tr A0A114PRM3 A0A114PRM3_9PROT     | Nitrosomonas nitrosa               | Peptidyl-prolyl cis-trans isomerase            | 0 | 235,38 | 8,29E+08 | 20  | 4  |  | 4  |  | 4 | 5    | 29,6   | 20,416                       | A0A114PRM3;A0A114N5T1;A0A113    | A0A114PRM3                       | 384        | 4,28    | 0,07963 |         |
| 4,37E+06 | 2,70E+06 | 2,53E+06 | 2,85E+06 | 1,59E+06 | 1,17E+07 | 6,36E+06 | 9,15E+06 | 4,05E+06 | 5,49E+06 | >tr A0A114SWH2 A0A114SWH2_9PROT     | Nitrosomonas nitrosa               | Cytochrome c553                                | 0 | 87,536 | 6,08E+08 | 25  | 4  |  | 4  |  | 4 | 1    | 20,8   | 23,395                       | A0A114SWH2                      | A0A114SWH2                       | 445        | 0,45    | 0,00068 |         |
| 7,31E+05 | 6,14E+05 | 0,00E+00 | 0,00E+00 | 0,00E+00 | 2,98E+06 | 1,03E+07 | 8,02E+06 | 1,17E+07 | 3,66E+06 | >tr A0A114UIC0 A0A114UIC0_9PROT     | Nitrosomonas nitrosa               | 50S ribosomal protein L1                       | 0 | 92,089 | 1,48E+09 | 20  | 5  |  | 5  |  | 4 | 14   | 26,8   | 24,384                       | A0A114UIC0;A0A117J9H2;A0A1G55   | A0A114UIC0                       | 464        | 0,75    | 0,00297 |         |
| 2,41E+06 | 4,94E+05 | 8,13E+05 | 3,10E+06 | 2,46E+05 | 3,78E+06 | 2,73E+06 | 1,72E+06 | 3,06E+06 | 2,73E+06 | >tr A0A114KYZ1 A0A114KYZ1_9PROT     | Nitrosomonas nitrosa               | 2-isopropylmalate synthase                     | 0 | 53,052 | 5,01E+08 | 27  | 5  |  | 5  |  | 5 | 27   | 15,1   | 55,81                        | A0A114KYZ1;F9ZFH6;A0A1H8NIP1    | A0A114KYZ1;F9ZFH6;A0A1H8NIP1;A0A | 311        | -1,85   | 0,00003 |         |
| 4,81E+06 | 8,24E+06 | 7,37E+06 | 6,72E+06 | 0,00E+00 | 1,79E+07 | 1,45E+07 | 1,06E+07 | 1,18E+07 | 9,12E+06 | >tr A0A114L480 A0A114L480_9PROT     | Nitrosomonas nitrosa               | 60 kDa chaperonin                              | 0 | 323,31 | 3,40E+09 | 53  | 14 |  | 14 |  | 5 | 13   | 29,8   | 57,596                       | A0A114L480;A0A114CC81;F9ZHH9    | A0A114L480;A0A114CC81            | 318        | -0,38   | 0,00003 |         |
| 0,00E+00 | 0,00E+00 | 0,00E+00 | 0,00E+00 | 0,00E+00 | 4,07E+05 | 2,36E+06 | 1,51E+06 | 6,01E+05 | 3,66E+06 | >tr A0A114LHC4 A0A114LHC4_9PROT     | Nitrosomonas nitrosa               | Triosephosphate isomerase                      | 0 | 323,31 | 1,87E+09 | 5   | 5  |  | 5  |  | 5 | 8    | 30,7   | 27,188                       | A0A114LHC4;A0A113GYW1;A0A1H1    | A0A114LHC4                       | 325        | 4,25    | 0,02157 |         |
| 3,69E+06 | 1,81E+06 | 2,41E+06 | 2,45E+06 | 3,20E+06 | 5,41E+05 | 3,72E+05 | 0,00E+00 | 9,47E+04 | 3,12E+05 | >tr A0A114QI56 A0A114QI56_9PROT     | Nitrosomonas nitrosa               | Small metal-binding protein                    | 0 | 224,42 | 4,90E+08 | 16  | 5  |  | 5  |  | 5 | 1    | 30,2   | 12,576                       | A0A114QI56                      | A0A114QI56                       | 405        | 5,93    | 0,02645 |         |
| 1,98E+07 | 2,31E+07 | 2,31E+07 | 1,29E+07 | 1,56E+06 | 7,20E+05 | 4,47E+05 | 2,94E+05 | 4,16E+05 | 0,00E+00 | >tr A0A114QLQ4 A0A114QLQ4_9PROT     | Nitrosomonas nitrosa               | Uncharacterized protein                        | 0 | 40,768 | 5,57E+08 | 12  | 5  |  | 5  |  | 5 | 1    | 29,4   | 24,456                       | A0A114QLQ4                      | A0A114QLQ4                       | 408        | 4,84    | 0,01236 |         |
| 0,00E+00 | 0,00E+00 | 0,00E+00 | 0,00E+00 | 0,00E+00 | 3,17E+06 | 3,05E+06 | 4,25E+05 | 1,17E+06 | 8,09E+05 | >tr A0A114S2G6 A0A114S2G6_9PROT     | Nitrosomonas nitrosa               | Tyrosinase                                     | 0 | 323,31 | 8,46E+08 | 18  | 5  |  | 5  |  | 5 | 5    | 18,5   | 53,507                       | A0A114S2G6;A0A285BU58;A0A113    | A0A114S2G6                       | 429        | 2,47    | 0,01750 |         |
| 1,25E+06 | 0,00E+00 | 0,00E+00 | 1,13E+06 | 0,00E+00 | 1,57E+08 | 1,21E+08 | 5,30E+07 | 1,02E+08 | 1,54E+08 | >tr A0A114S356 A0A114S356_9PROT     | Nitrosomonas nitrosa               | Nitrosocyanin                                  | 0 | 323,31 | 1,06E+10 | 84  | 5  |  | 5  |  | 5 | 7    | 50,7   | 14,701                       | A0A114S356;A0A1H3P5Q5;A0A1G     | A0A114S356;A0A1H3P5Q5;A0A1G8GM   | 430        | 0,66    | 0,00028 |         |
| 0,00E+00 | 0,00E+00 | 0,00E+00 | 5,82E+05 | 0,00E+00 | 2,75E+07 | 3,16E+07 | 1,31E+07 | 1,74E+07 | 2,62E+07 | >tr D8PI40 D8PI40_9BACT             | Nitrospira defluvi                 | Putative Nitrate oxidoreductase, beta subunit  | 0 | 323,31 | 7,15E+09 | 100 | 6  |  | 6  |  | 6 | 102  | 20     | 49,985                       | D8PI40;A0A1W9J2R7;A0A1W9GZ5     | D8PI40;A0A1W9J2R7;A0A1W9GZ5;A    | 89         | 0,17    | 0,00014 |         |
| 2,96E+05 | 0,00E+00 | 0,00E+00 | 2,88E+05 | 2,12E+05 |          |          |          |          |          |                                     |                                    |                                                |   |        |          |     |    |  |    |  |   |      |        |                              |                                 |                                  |            |         |         |         |
