# Supplementary material for: Quantitative proteomics for monitoring microbial dynamics in activated sludge from landfill leachate treatment
Source: Royal Society of Chemistry journal article supplement (doi:10.1039/c8ew00892b), 2019-01-01
Supplement: c8ew00892b3.pdf [file c8ew00892b3.pdf]

| iBAQ_1_Q1 | iBAQ_1_Q2 | iBAQ_1_Q3 | iBAQ_1_Q4 | iBAQ_1_Q5 | iBAQ_4_Q1 | iBAQ_4_Q2 | iBAQ_4_Q3 | iBAQ_4_Q4 | iBAQ_4_Q5 | Fasta                              | OS                              | Protein                                                    | Q-value | Score  | Intensity | MS/MS Count | Peptides | Razor + unique pept. | Unique peptides | Number of proteins | Sequence coverage           | Mol. weight [kDa]                 | protein IDs                       | Majority protein IDs         | id    | log2 ratio | t.test  |
|-----------|-----------|-----------|-----------|-----------|-----------|-----------|-----------|-----------|-----------|------------------------------------|---------------------------------|------------------------------------------------------------|---------|--------|-----------|-------------|----------|----------------------|-----------------|--------------------|-----------------------------|-----------------------------------|-----------------------------------|------------------------------|-------|------------|---------|
| 3.21E+07  | 3.55E+07  | 1.72E+07  | 2.47E+07  | 2.50E+07  | 2.58E+05  | 2.71E+05  | 8.63E+04  | 2.49E+05  | 2.20E+05  | <tr>[SSYP6]SSYP6_PARA              | Paracoccus aminophilus JCM 7688 | Succinate dehydrogenase flavoprotein subunit               | 0       | 11,689 | 8,56E+07  | 5           | 2        | 2                    | 2               | 40                 | 5.5                         | 65,202                            | SSYP6;Q59661;A1A217;AOA2H5E1      | SSYP6;Q59661;A1A217;AOA2H5E1 | 14    | 1.01       | 0.00052 |
| 1.91E+06  | 1.67E+06  | 1.12E+06  | 1.48E+06  | 6.90E+05  | 1.61E+07  | 8.81E+06  | 5.69E+06  | 1.26E+07  | 1.65E+07  | <tr>[AOA136M6D6]AOA136M6D6_9BACT   | Candidatus Brocadia sinica      | Putative cytochrome c                                      | 0       | 17,613 | 2,57E+09  | 8           | 2        | 2                    | 7               | 4.1                | 53,545                      | AOA136M6D6;AOA00C9PEX5;AOA1136J6M | AOA136M6D6;AOA00C9PEX5;AOA1136J6M | 43                           | 0.20  | 0.00429    |         |
| 0.00E+00  | 9.71E+04  | 1.25E+04  | 1.65E+05  | <tr>[AOA119BSU1]AOA119BSU1_9RHOB   | Paracoccus sp. SM22-M-07        | Enolase                                                    | 0       | 12,115 | 1,18E+08  | 4           | 2        | 2                    | 19              | 7.1                | 45,162                      | AOA119BSU1;AOA110GT77;AOA0D6TG6   | AOA119BSU1;AOA110GT77;AOA0D6TG6   | 48                           | 4.46  | 0.11830    |         |
| 0.00E+00  | 0.00E+00  | 0.00E+00  | 0.00E+00  | 0.00E+00  | 1.02E+06  | 1.04E+06  | 2.30E+05  | 3.61E+05  | 2.62E+05  | <tr>[AOA114MIJAS]AOA114MIJAS_9PROT | Nitrosomonas communis           | Ketol-acid reductoisomerase (NADP(+))                      | 0       | 11,669 | 1,37E+08  | 5           | 2        | 2                    | 26              | 8.3                | 37,091                      | AOA114MIJAS;AOA114KYW5;AOA113K16  | AOA114MIJAS;AOA114KYW5;AOA113K16  | 52                           | 0.40  | 0.01787    |         |
| 3.66E+07  | 2.98E+07  | 2.70E+07  | 3.46E+07  | 1.30E+07  | 1.73E+06  | 0.00E+00  | 0.00E+00  | 0.00E+00  | 0.00E+00  | <tr>[AOA114SW40]AOA114SW40_9PROT   | Nitrosomonas communis           | Phosphoribulokinase                                        | 0       | 11,383 | 5,84E+07  | 2           | 2        | 2                    | 33              | 9                  | 32,494                      | AOA114SW40;AOA114NEM0;AOA113K16   | AOA114SW40;AOA114NEM0;AOA113K16   | 58                           | -0.36 | 0.34662    |         |
| 8.23E+05  | 2.01E+06  | 0.00E+00  | 8.47E+05  | 7.01E+05  | 0.00E+00  | 0.00E+00  | 0.00E+00  | 0.00E+00  | 0.00E+00  | <tr>[AOA256VWVX3]AOA256VWVX3_9BACT | Nitrosopira sp. UW-LDO-01       | Pyruvate ferredoxin oxidoreductase                         | 0       | 16,557 | 4,33E+08  | 8           | 2        | 2                    | 14              | 26.1               | 9,9126                      | AOA256VWVX3;AOA1W9JRC4;AOA1136J6M | AOA256VWVX3;AOA1W9JRC4;AOA1136J6M | 92                           | #ZAH! | 0.00000    |         |
| 5.14E+05  | 3.62E+05  | 3.33E+05  | 4.82E+05  | 6.65E+04  | 9.39E+05  | 2.22E+06  | 3.02E+05  | 1.65E+06  | 1.75E+06  | <tr>[AOA11W9V85]AOA11W9V85_9BACT   | Nitrosopira sp. ST-bio5         | 10 kDa chaperonin                                          | 0       | 23,793 | 1,39E+08  | 4           | 2        | 2                    | 16              | 37.4               | 10,993                      | AOA11W9V85;AOA11W9V85;AOA1136J6M  | AOA11W9V85;AOA11W9V85;AOA1136J6M  | 103                          | 0.90  | 0.00288    |         |
| 0.00E+00  | 0.00E+00  | 0.00E+00  | 0.00E+00  | 0.00E+00  | 4.77E+05  | 7.00E+05  | 4.05E+05  | 1.52E+05  | 0.00E+00  | <tr>[AOA002GG72]AOA002GG72_NITMO   | Nitrosopira moscoviensis        | Carboxy-terminal-processing protease                       | 0       | 11,287 | 2,79E+08  | 3           | 2        | 2                    | 11              | 6.3                | 47,922                      | AOA002GG72;AOA136J6M;D8PHM3;A     | AOA002GG72;AOA136J6M;D8PHM3;A     | 112                          | 2.17  | 0.03509    |         |
| 5.27E+05  | 7.43E+05  | 5.52E+05  | 7.71E+05  | 6.65E+05  | 0.00E+00  | 0.00E+00  | 0.00E+00  | 1.42E+05  | 1.94E+05  | <tr>[AOA1W9J574]AOA1W9J574_9BACT   | Nitrosopira sp. ST-bio5         | Iron-sulfur cluster assembly scaffold protein H            | 0       | 32,331 | 2,21E+08  | 15          | 2        | 2                    | 15              | 18.9               | 13,779                      | AOA1W9J574;AOA1W1185;AOA256VW     | AOA1W9J574;AOA1W1185;AOA256VW     | 120                          | 5.94  | #ZAH!      |         |
| 0.00E+00  | 0.00E+00  | 0.00E+00  | 0.00E+00  | 0.00E+00  | 8.05E+05  | 0.00E+00  | 0.00E+00  | 0.00E+00  | 0.00E+00  | <tr>[D8PH80]D8PH80_9BACT           | Nitrosopira defluvii            | Transcription termination/antitermination protein          | 0       | 11,546 | 1,11E+08  | 2           | 2        | 2                    | 13              | 7.4                | 42,058                      | D8PH80;AOA1W1HVM7;AOA1W9J574      | D8PH80;AOA1W1HVM7;AOA1W9J574      | 122                          | 2.32  | 0.34665    |         |
| 3.24E+05  | 5.96E+05  | 0.00E+00  | 3.89E+05  | 9.25E+04  | 1.47E+07  | 1.07E+07  | 4.26E+06  | 1.04E+07  | 1.44E+07  | <tr>[AOA136JNW2]AOA136JNW2_9BACT   | Nitrosopira sp. OLB3            | Rubryerythrin                                              | 0       | 32,331 | 3,57E+09  | 27          | 2        | 2                    | 2               | 24                 | 15,607                      | AOA136JNW2;AOA0K2GJIA;D8PH80      | AOA136JNW2;AOA0K2GJIA;D8PH80      | 124                          | 3.31  | 0.00042    |         |
| 8.57E+05  | 1.06E+06  | 3.15E+05  | 6.89E+05  | 3.36E+05  | 1.70E+06  | 1.05E+06  | 1.34E+05  | 5.59E+05  | 9.65E+05  | <tr>[D8PH70]D8PH70_9BACT           | Nitrosopira defluvii            | Peroxioredoxin                                             | 0       | 28,169 | 1,45E+09  | 10          | 2        | 2                    | 4               | 10.3               | 17,523                      | D8PH70;AOA1W1HVZ2;AOA136JNW2      | D8PH70;AOA1W1HVZ2;AOA136JNW2      | 147                          | 5.00  | 0.00986    |         |
| 2.89E+05  | 5.07E+05  | 4.55E+05  | 3.05E+05  | 1.85E+05  | 9.58E+05  | 1.16E+06  | 0.00E+00  | 6.06E+05  | 0.00E+00  | <tr>[AOA0054L7J5]AOA0054L7J5_9BACT | Candidatus Nitrosopira nitrosa  | Glutaredoxin                                               | 0       | 11,489 | 1,85E+08  | 2           | 2        | 2                    | 7               | 21.5               | 12,246                      | AOA0054L7J5;AOA1W9G8N9;AOA1136J6M | AOA0054L7J5;AOA1W9G8N9;AOA1136J6M | 159                          | 3.12  | 0.05243    |         |
| 0.00E+00  | 0.00E+00  | 0.00E+00  | 0.00E+00  | 0.00E+00  | 1.73E+05  | 1.73E+05  | 0.00E+00  | 0.00E+00  | 0.00E+00  | <tr>[AOA0054L7J5]AOA0054L7J5_9BACT | Candidatus Nitrosopira nitrosa  | Uncharacterized protein                                    | 0       | 15,415 | 1,42E+08  | 10          | 2        | 2                    | 6               | 25.4               | 14,42                       | AOA0054L7J5;AOA256X1N2;AOA1W9H4   | AOA0054L7J5;AOA256X1N2;AOA1W9H4   | 164                          | 4.83  | 0.18965    |         |
| 0.00E+00  | 2.50E+05  | 2.00E+05  | 2.20E+05  | 1.98E+05  | 3.93E+05  | 3.54E+05  | 2.83E+05  | 2.80E+05  | 2.77E+05  | <tr>[AOA256X0N8]AOA256X0N8_9BACT   | Nitrosopira sp. UW-LDO-01       | Isocitrate dehydrogenase (NADP(+))                         | 0       | 19,833 | 1,16E+08  | 2           | 2        | 2                    | 14              | 4.8                | 81,47                       | AOA256X0N8;AOA054L35;AOA1W9G6     | AOA256X0N8;AOA054L35;AOA1W9G6     | 166                          | -1.21 | 0.00000    |         |
| 1.73E+06  | 2.24E+06  | 1.74E+06  | 1.75E+06  | 1.06E+06  | 0.00E+00  | 3.11E+06  | 1.49E+06  | 1.71E+06  | 0.00E+00  | <tr>[D8P754]D8P754_9BACT           | Nitrosopira defluvii            | Uncharacterized protein                                    | 0       | 34,869 | 1,24E+09  | 5           | 2        | 2                    | 6               | 26.4               | 8,2885                      | D8P754;AOA1W1HVVW8;AOA136J6M      | D8P754;AOA1W1HVVW8;AOA136J6M      | 184                          | 5.26  | 0.06318    |         |
| 8.60E+06  | 8.20E+06  | 3.17E+06  | 4.16E+06  | 3.77E+06  | 3.71E+06  | 4.37E+06  | 9.12E+05  | 2.10E+06  | 3.19E+06  | <tr>[D8PAF3]D8PAF3_9BACT           | Nitrosopira defluvii            | Uncharacterized protein                                    | 0       | 13,864 | 8,82E+08  | 13          | 2        | 2                    | 4               | 7.4                | 19,505                      | D8PAF3;AOA1W1HTV4;AOA136J6M       | D8PAF3;AOA1W1HTV4;AOA136J6M       | 188                          | 2.05  | 0.00160    |         |
| 4.96E+05  | 5.84E+05  | 4.35E+05  | 4.05E+05  | 4.63E+05  | 4.32E+05  | 7.02E+05  | 0.00E+00  | 0.00E+00  | 0.00E+00  | <tr>[AOA136K854]AOA136K854_9BACT   | Nitrosopira sp. OLB3            | DNA-directed RNA polymerase subunit alpha                  | 0       | 11,254 | 3,76E+07  | 2           | 2        | 2                    | 6               | 36.512             | AOA136K854;D8PCY0;AOA1W1HR6 | AOA136K854;D8PCY0;AOA1W1HR6       | 193                               | -0.79                        | #ZAH! |            |         |
| 9.97E+06  | 9.33E+06  | 6.76E+06  | 7.68E+06  | 7.66E+06  | 5.78E+05  | 3.66E+05  | 0.00E+00  | 6.68E+05  | 1.00E+00  | <tr>[AOA136K8G3]AOA136K8G3_9BACT   | Nitrosopira sp. OLB3            | Putative RNA-binding protein RbpA                          | 0       | 13,647 | 2,04E+08  | 3           | 3        | 3                    | 6               | 35.5               | 11,445                      | AOA136K8G3;AOA1W9B34;AOA1136J6M   | AOA136K8G3;AOA1W9B34;AOA1136J6M   | 196                          | 4.33  | 0.05088    |         |
| 5.02E+05  | 5.56E+05  | 1.71E+06  | 3.04E+06  | 1.59E+06  | 2.34E+06  | 2.23E+06  | 0.00E+00  | 1.30E+06  | 2.04E+06  | <tr>[AOA136KDL4]AOA136KDL4_9BACT   | Nitrosopira sp. OLB3            | Cytochrome c peroxidase                                    | 0       | 12,192 | 3,48E+08  | 8           | 2        | 2                    | 4               | 4.8                | 54,114                      | AOA136KDL4;A3VXW5;AOA0K2G6E       | AOA136KDL4;A3VXW5;AOA0K2G6E       | 198                          | -0.40 | #ZAH!      |         |
| 3.93E+06  | 4.71E+06  | 2.81E+06  | 4.64E+06  | 2.87E+06  | 0.00E+00  | 4.32E+04  | 0.00E+00  | 1.06E+05  | 1.40E+05  | <tr>[AOA136KZD6]AOA136KZD6_9BACT   | Nitrosopira sp. OLB3            | Peptidyl-prolyl cis-trans isomerase                        | 0       | 19,598 | 6,49E+08  | 15          | 2        | 2                    | 14              | 15.7               | 23,224                      | AOA136KZD6;AOA1W9GPF4;AOA1136J6M  | AOA136KZD6;AOA1W9GPF4;AOA1136J6M  | 199                          | 7.22  | 0.07494    |         |
| 1.02E+06  | 2.28E+06  | 9.28E+05  | 3.32E+06  | 2.28E+06  | 2.50E+05  | 7.91E+05  | 3.78E+05  | 7.08E+05  | 1.10E+06  | <tr>[AOA1E4DGV7]AOA1E4DGV7_9BACT   | Nitrosopira sp. SCN 59-13       | Serine protease                                            | 0       | 37,664 | 2,13E+08  | 10          | 2        | 2                    | 6               | 8.8                | 53,262                      | AOA1E4DGV7;AOA1W10C2;AOA1136J6M   | AOA1E4DGV7;AOA1W10C2;AOA1136J6M   | 210                          | 1.20  | 0.00276    |         |
| 2.06E+06  | 2.81E+06  | 1.25E+06  | 1.01E+06  | 1.25E+06  | 3.44E+06  | 2.55E+06  | 1.01E+06  | 1.16E+06  | 4.57E+05  | <tr>[AOA238WGN0]AOA238WGN0_9RHOB   | Paracoccus sediminis            | Nit/TauT family transport system substrate-binding protein | 0       | 13,978 | 2,06E+08  | 8           | 2        | 2                    | 17              | 7.1                | 34,84                       | AOA238WGN0;AOA1N7KLG7;AOA1136J6M  | AOA238WGN0;AOA1N7KLG7;AOA1136J6M  | 219                          | 0.24  | 0.01390    |         |
| 7.90E+05  | 9.21E+05  | 6.83E+05  | 9.39E+05  | 6.40E+05  | 0.00E+00  | 0.00E+00  | 3.43E+05  | 4.46E+05  | 2.72E+05  | <tr>[AOA1G7BKE7]AOA1G7BKE7_9RHOB   | Paracoccus isopora              | ATP synthase subunit alpha                                 | 0       | 96,726 | 1,49E+08  | 2           | 4        | 4                    | 33              | 10.6               | 55,101                      | AOA1G7BKE7;AOA2E3CCH9;AOA2D28X2   | AOA1G7BKE7;AOA2E3CCH9;AOA2D28X2   | 238                          | 2.21  | 0.04795    |         |
| 1.78E+06  | 1.71E+06  | 1.44E+06  | 1.90E+06  | 1.35E+06  | 2.16E+07  | 1.84E+07  | 8.86E+06  | 1.87E+07  | 2.50E+07  | <tr>[AOA14UY44]AOA14UY44_9PROT     | Nitrosomonas nitrosa            | 30S ribosomal protein S7                                   | 0       | 161,78 | 8,85E+08  | 11          | 2        | 2                    | 26              | 16.7               | 17,956                      | AOA14UY44;AOA1H3NRM1;AOA1136J6M   | AOA14UY44;AOA1H3NRM1;AOA1136J6M   | 249                          | -1.45 | 0.00013    |         |
| 7.90E+05  | 1.00E+06  | 9.56E+05  | 1.41E+06  | 6.11E+05  | 5.96E+05  | 5.03E+05  | 3.66E+05  | 3.06E+05  | 3.53E+05  | <tr>[AOA14TA1A1]AOA14TA1A1_9PROT   | Nitrosomonas nitrosa            | Ribose-phosphate pyrophosphokinase                         | 0       | 11,567 | 3,89E+07  | 2           | 2        | 2                    | 26              | 7.9                | 34,799                      | AOA14TA1A1;AOA1H3KH92;AOA1136J6M  | AOA14TA1A1;AOA1H3KH92;AOA1136J6M  | 261                          | -2.18 | #ZAH!      |         |
| 3.67E+07  | 5.26E+07  | 2.43E+07  | 4.07E+07  | 2.55E+07  | 3.92E+06  | 5.00E+05  | 2.26E+06  | 3.35E+06  | 3.42E+06  | <tr>[AOA114H8X84]AOA114H8X84_9RHOB | Paracoccus alcaliphilus         | Amino acid ABC transporter substrate-binding protein       | 0       | 70,212 | 3,53E+08  | 8           | 2        | 2                    | 15              | 9.9                | 29,44                       | AOA114H8X84;AOA2D2C0L2;AOA2H5E1   | AOA114H8X84;AOA2D2C0L2;AOA2H5E1   | 275                          | -0.64 | 0.00228    |         |
| 0.00E+00  | 0.00E+00  | 0.00E+00  | 0.00E+00  | 0.00E+00  | 3.53E+05  | 3.42E+05  | 3.66E+05  | 5.91E+05  | 5.95E+05  | <tr>[AOA238Y2Z2]AOA238Y2Z2_9RHOB   | Paracoccus sediminis            | Aconitate hydratase                                        | 0       | 16,898 | 1,09E+08  | 14          | 2        | 2                    | 40              | 3.5                | 99,539                      | AOA238Y2Z2;AOA1H8GA10;Q3SV1;Q     | AOA238Y2Z2;AOA1H8GA10;Q3SV1;Q     | 276                          | -1.75 | 0.00004    |         |
| 8.19E+04  | 6.92E+04  | 5.31E+04  | 0.00E+00  | 5.38E+04  | 1.90E+06  | 1.46E+06  | 1.39E+05  | 2.24E+06  | 1.80E+06  | <tr>[AOA1H8KNX3]AOA1H8KNX3_9RHOB   | Paracoccus alcaliphilus         | MoXr-like ATPase                                           | 0       | 11,778 | 2,26E+08  | 3           | 2        | 2                    | 29              | 10.1               | 32,827                      | AOA1H8KNX3;A1AZG6;AOA2D2C007;A    | AOA1H8KNX3;A1AZG6;AOA2D2C007;A    | 281                          | -1.47 | 0.00324    |         |
| 3.58E+05  | 9.14E+05  | 6.19E+05  | 9.33E+06  | 1.65E+05  | 5.88E+06  | 6.50E+06  | 3.90E+06  | 5.86E+06  | 7.69E+06  | <tr>[AOA1V0GKN9]AOA1V0GKN9_9RHOB   | Paracoccus zeei                 | Nitrous-oxide reductase                                    | 0       | 73,05  | 1,67E+09  | 22          | 2        | 2                    | 4               | 4.0                | 70,504                      | AOA1V0GKN9;AOA113AAL6;AOA2D2C2    | AOA1V0GKN9;AOA113AAL6;AOA2D2C2    | 299                          | -0.42 | 0.00001    |         |
| 3.71E+05  | 3.47E+05  | 6.94E+05  | 0.00E+00  | 4.99E+05  | 3.58E+05  | 1.75E+05  | 2.41E+05  | 7.13E+05  | 5.21E+05  | <tr>[AOA2H5E2C3]AOA2H5E2C3_9RHOB   | Paracoccus zhejiangensis        | Polyribonucleotide nucleotidyltransferase                  | 0       | 14,262 | 8,23E+07  | 10          | 2        | 2                    | 17              | 4.8                | 77,107                      | AOA2H5E2C3;AOA113BSN7;SSYFV       | AOA2H5E2C3;AOA113BSN7;SSYFV       | 300                          | -0.15 | 0.00357    |         |
| 7.13E+05  | 6.46E+05  | 0.00E+00  |           |           |           |           |           |           |           |                                    |                                 |                                                            |         |        |           |             |          |                      |                 |                    |                             |                                   |                                   |                              |       |            |         |

|          |          |          |          |          |          |          |          |          |          |                                     |                                          |                                                 |                                 |        |          |          |   |   |   |    |      |        |                                |                                   |            |        |         |         |
|----------|----------|----------|----------|----------|----------|----------|----------|----------|----------|-------------------------------------|------------------------------------------|-------------------------------------------------|---------------------------------|--------|----------|----------|---|---|---|----|------|--------|--------------------------------|-----------------------------------|------------|--------|---------|---------|
| 2.42E+06 | 2.17E+06 | 9.17E+05 | 0.00E+00 | 2.26E+06 | 0.00E+00 | 9.98E+05 | 0.00E+00 | 0.00E+00 | 0.00E+00 | 0.00E+00                            | >tr A0A114KU12 A0A114KU12_9PROT          | Nitrosomonas nitrosa                            | Isocitrate dehydrogenase [NADP] | 0      | 18,867   | 2,09E+08 | 6 | 3 | 3 | 3  | 1    | 9.6    | 45,928                         | A0A114KU12                        | A0A114KU12 | 308    | 2.95    | 0.34664 |
| 1.35E+05 | 9.43E+04 | 8.48E+04 | 8.94E+04 | 1.32E+05 | 2.95E+05 | 1.99E+05 | 1.35E+05 | 4.42E+04 | 1.44E+05 | >tr A0A114L271 A0A114L271_9PROT     | Nitrosomonas nitrosa                     | Phosphate ABC transporter substrate-binding     | 0                               | 25,94  | 1,47E+08 | 8        | 3 | 3 | 3 | 8  | 13   | 36,599 | A0A114L271;A0A285BWT3;F9ZGQ5   | A0A114L271                        | 314        | 3.01   | 0.00417 |         |
| 7.30E+06 | 9.87E+06 | 4.65E+06 | 7.50E+06 | 6.46E+06 | 1.65E+08 | 1.50E+08 | 5.72E+07 | 1.20E+08 | 1.12E+08 | >tr A0A114L317 A0A114L317_9PROT     | Nitrosomonas nitrosa                     | Dissimilatory nitrite reductase (NO-forming), c | 0                               | 251,32 | 6,28E+09 | 116      | 3 | 3 | 3 | 7  | 11,7 | 39,397 | A0A114L317;A0A285BWT3;F9ZGQ5   | A0A114L317                        | 316        | -1.75  | 0.00019 |         |
| 1.76E+06 | 2.45E+06 | 2.59E+06 | 1.88E+06 | 0.00E+00 | 0.00E+00 | 0.00E+00 | 0.00E+00 | 1.35E+05 | 0.00E+00 | >tr A0A114L437 A0A114L437_9PROT     | Nitrosomonas nitrosa                     | Phospholipid transport system substrate-bind    | 0                               | 32,113 | 7,15E+07 | 8        | 3 | 3 | 3 | 1  | 19.6 | 23,761 | A0A114L437                     | A0A114L437                        | 320        | 5.31   | 0.34693 |         |
| 1.20E+08 | 1.62E+08 | 1.32E+08 | 1.17E+08 | 1.10E+08 | 6.64E+05 | 4.68E+05 | 2.32E+05 | 3.83E+05 | 6.43E+05 | >tr A0A114L408 A0A114L408_9PROT     | Nitrosomonas nitrosa                     | Apoptosis-inducing factor, C-term               | 0                               | 19,579 | 7,65E+07 | 7        | 3 | 3 | 3 | 1  | 11.2 | 43,74  | A0A114L408                     | A0A114L408                        | 327        | -0.55  | 0.00036 |         |
| 1.38E+05 | 1.04E+05 | 8.02E+04 | 0.00E+00 | 0.00E+00 | 0.00E+00 | 0.00E+00 | 1.79E+05 | 2.56E+05 | 2.58E+05 | >tr A0A114M5U7 A0A114M5U7_9PROT     | Nitrosomonas nitrosa                     | Malate dehydrogenase                            | 0                               | 20,039 | 9,65E+07 | 6        | 3 | 3 | 3 | 5  | 13.4 | 35,956 | A0A114M5U7;F8GE84;A0A112A2M    | A0A114M5U7                        | 336        | 3.28   | 0.04486 |         |
| 2.54E+08 | 2.99E+08 | 1.87E+08 | 2.58E+08 | 2.86E+08 | 3.24E+05 | 6.42E+04 | 3.89E+04 | 5.88E+05 | 7.25E+05 | >tr A0A114M6F6 A0A114M6F6_9PROT     | Nitrosomonas nitrosa                     | Cytochrome c-type biogenesis protein CcmH       | 0                               | 323,31 | 5,15E+08 | 67       | 3 | 3 | 3 | 1  | 9.9  | 48,123 | A0A114M6F6                     | A0A114M6F6                        | 337        | 3.50   | 0.03488 |         |
| 6.66E+06 | 4.00E+06 | 3.12E+06 | 7.74E+06 | 3.03E+06 | 0.00E+00 | 0.00E+00 | 1.29E+05 | 3.62E+05 | 2.49E+05 | >tr A0A114MRP1 A0A114MRP1_9PROT     | Nitrosomonas nitrosa                     | Uncharacterized protein Yjb), contains pentap   | 0                               | 323,31 | 1,55E+08 | 12       | 3 | 3 | 3 | 1  | 18.5 | 27,233 | A0A114MRP1                     | A0A114MRP1                        | 343        | 4.47   | 0.06973 |         |
| 4.60E+06 | 3.66E+06 | 3.45E+06 | 4.61E+06 | 4.85E+06 | 2.19E+06 | 2.83E+06 | 1.09E+06 | 1.99E+06 | 2.47E+06 | >tr A0A114NE55 A0A114NE55_9PROT     | Nitrosomonas nitrosa                     | Uncharacterized protein                         | 0                               | 38,082 | 1,77E+08 | 7        | 3 | 3 | 3 | 8  | 19.8 | 25,246 | A0A114NE55;A0A114S472;A0A113K  | A0A114NE55                        | 351        | -3.10  | #ZAH!1  |         |
| 3.82E+06 | 4.64E+06 | 4.17E+06 | 5.07E+06 | 2.41E+06 | 1.33E+06 | 2.82E+06 | 9.62E+05 | 2.21E+06 | 3.23E+06 | >tr A0A114PK05 A0A114PK05_9PROT     | Nitrosomonas nitrosa                     | ATP synthase gamma chain                        | 0                               | 106,38 | 2,96E+08 | 18       | 3 | 3 | 3 | 27 | 17.4 | 32,795 | A0A114PK05;A0A114S55CT9;Q82XP9 | A0A114PK05;A0A114S55CT9;Q82XP9;QO | 380        | -0.62  | 0.00117 |         |
| 2.71E+07 | 3.18E+07 | 2.30E+07 | 2.20E+07 | 2.68E+07 | 4.00E+04 | 0.00E+00 | 4.39E+05 | 0.00E+00 | 5.59E+05 | >tr A0A114PT58 A0A114PT58_9PROT     | Nitrosomonas nitrosa                     | 3-isopropylmalate dehydrogenase                 | 0                               | 20,923 | 1,66E+08 | 6        | 3 | 3 | 3 | 10 | 12.7 | 38,028 | A0A114PT58;A0A114N588;A0A113G  | A0A114PT58                        | 388        | 2.89   | 0.12376 |         |
| 5.29E+04 | 4.84E+04 | 4.46E+04 | 3.13E+04 | 4.78E+04 | 2.17E+07 | 1.46E+07 | 9.13E+06 | 1.43E+07 | 1.30E+07 | >tr A0A114PWR0 A0A114PWR0_9PROT     | Nitrosomonas nitrosa                     | Uncharacterized protein                         | 0                               | 185,02 | 2,71E+09 | 58       | 3 | 3 | 3 | 1  | 25   | 18,368 | A0A114PWR0                     | A0A114PWR0                        | 390        | 1.87   | 0.00010 |         |
| 3.09E+07 | 1.97E+07 | 1.13E+07 | 5.39E+07 | 6.11E+06 | 2.46E+06 | 6.82E+05 | 1.90E+06 | 1.90E+06 | 3.25E+06 | >tr A0A114PYC6 A0A114PYC6_9PROT     | Nitrosomonas nitrosa                     | Uncharacterized protein                         | 0                               | 17,244 | 1,19E+08 | 4        | 3 | 3 | 3 | 6  | 19.3 | 23,753 | A0A114PYC6;A0A114S58M3;A0A11G  | A0A114PYC6;A0A114S58M3;A0A11G7YB  | 394        | -1.75  | 0.00126 |         |
| 1.68E+05 | 2.39E+05 | 1.84E+05 | 2.22E+05 | 1.94E+05 | 0.00E+00 | 3.67E+05 | 0.00E+00 | 8.15E+04 | 3.11E+05 | >tr A0A114Q279 A0A114Q279_9PROT     | Nitrosomonas nitrosa                     | Heat shock protein Hsp20                        | 0                               | 22,395 | 7,60E+06 | 5        | 3 | 3 | 3 | 1  | 28.2 | 19,388 | A0A114Q279                     | A0A114Q279                        | 397        | #ZAH!1 | #ZAH!1  |         |
| 2.73E+05 | 3.77E+05 | 2.28E+05 | 3.50E+05 | 3.68E+05 | 3.13E+06 | 2.95E+06 | 2.11E+06 | 7.67E+06 | 4.29E+06 | >tr A0A114QB85 A0A114QB85_9PROT     | Nitrosomonas nitrosa                     | 5-methyltetrahydropteroylglutamate--hom         | 0                               | 323,31 | 1,43E+09 | 25       | 3 | 3 | 3 | 1  | 5.3  | 86,39  | A0A114QB85                     | A0A114QB85                        | 402        | 0.19   | 0.00003 |         |
| 1.09E+06 | 2.14E+06 | 1.17E+06 | 1.39E+06 | 1.47E+06 | 5.31E+06 | 6.13E+06 | 3.02E+05 | 4.00E+06 | 1.12E+06 | >tr A0A114QS20 A0A114QS20_9PROT     | Nitrosomonas nitrosa                     | 30S ribosomal protein S4                        | 0                               | 59,349 | 2,71E+08 | 11       | 3 | 3 | 3 | 1  | 23.1 | 20,805 | A0A114QS20                     | A0A114QS20                        | 415        | -1.12  | 0.01859 |         |
| 9.23E+06 | 4.78E+06 | 1.25E+07 | 4.24E+06 | 4.53E+06 | 9.72E+05 | 1.43E+06 | 2.92E+05 | 1.25E+06 | 8.60E+05 | >tr A0A114R1A5 A0A114R1A5_9PROT     | Nitrosomonas nitrosa                     | Pyridoxal phosphate homeostasis protein         | 0                               | 323,31 | 3,47E+08 | 11       | 3 | 3 | 3 | 8  | 20.2 | 26,294 | A0A114R1A5;A0A114KTR3;A0A113H  | A0A114R1A5                        | 418        | 2.19   | 0.00115 |         |
| 8.61E+06 | 1.17E+07 | 8.08E+06 | 2.07E+07 | 1.33E+07 | 5.92E+06 | 3.93E+06 | 2.98E+06 | 5.16E+06 | 6.35E+06 | >tr A0A114RGD5 A0A114RGD5_9PROT     | Nitrosomonas nitrosa                     | Glutamate dehydrogenase                         | 0                               | 323,31 | 9,28E+08 | 40       | 3 | 3 | 3 | 14 | 12.8 | 48,543 | A0A114RGD5;A0A114T2L4;A0A11H3  | A0A114RGD5;A0A114T2L4;A0A11H3W3   | 421        | -1.67  | 0.00005 |         |
| 0.00E+00 | 0.00E+00 | 0.00E+00 | 0.00E+00 | 0.00E+00 | 7.14E+05 | 5.81E+05 | 0.00E+00 | 7.67E+04 | 0.00E+00 | >tr A0A114RH9L A0A114RH9L_9PROT     | Nitrosomonas nitrosa                     | Uncharacterized protein                         | 0                               | 34,808 | 7,60E+08 | 8        | 3 | 3 | 3 | 1  | 9.3  | 60,081 | A0A114RH9L                     | A0A114RH9L                        | 422        | 4.74   | 0.11358 |         |
| 1.13E+05 | 9.48E+04 | 9.45E+04 | 1.20E+05 | 0.00E+00 | 3.99E+05 | 9.26E+05 | 1.20E+05 | 3.80E+05 | 1.02E+05 | >tr A0A114RSAS A0A114RSAS_9PROT     | Nitrosomonas nitrosa                     | Probable glycine dehydrogenase (decarboxyla     | 0                               | 23,223 | 6,18E+07 | 7        | 3 | 3 | 3 | 10 | 10.4 | 53,109 | A0A114RSAS;A0A114QH8;A0A113I   | A0A114RSAS                        | 425        | -3.24  | #ZAH!1  |         |
| 2.18E+07 | 2.70E+07 | 2.58E+07 | 3.12E+07 | 2.26E+07 | 8.64E+05 | 8.15E+05 | 3.49E+05 | 3.45E+05 | 7.78E+05 | >tr A0A114RSB1 A0A114RSB1_9PROT     | Nitrosomonas nitrosa                     | Polyribonucleotide nucleotidyltransferase       | 0                               | 31,994 | 1,07E+08 | 8        | 3 | 3 | 3 | 19 | 6.4  | 76,886 | A0A114RSB1;A0A113M3GY5;A0A11   | A0A114RSB1                        | 426        | -2.88  | #ZAH!1  |         |
| 5.69E+05 | 6.73E+05 | 6.89E+05 | 6.86E+05 | 8.63E+05 | 3.56E+06 | 1.82E+06 | 7.63E+05 | 2.66E+06 | 2.29E+06 | >tr A0A114ST18 A0A114ST18_9PROT     | Nitrosomonas nitrosa                     | OmpA-OmpF porin, OOP family                     | 0                               | 54,033 | 9,94E+08 | 11       | 3 | 3 | 3 | 1  | 17.8 | 25,966 | A0A114ST18                     | A0A114ST18                        | 444        | 2.43   | 0.00135 |         |
| 0.00E+00 | 0.00E+00 | 0.00E+00 | 0.00E+00 | 0.00E+00 | 1.24E+06 | 1.78E+06 | 1.36E+06 | 1.07E+06 | 8.52E+05 | >tr A0A114SYW0 A0A114SYW0_9PROT     | Nitrosomonas nitrosa                     | Uncharacterized protein                         | 0                               | 107,4  | 4,61E+08 | 19       | 3 | 3 | 3 | 1  | 5.5  | 72,973 | A0A114SYW0                     | A0A114SYW0                        | 447        | -0.11  | 0.00004 |         |
| 3.11E+07 | 5.66E+07 | 8.97E+07 | 2.12E+07 | 4.30E+07 | 1.32E+07 | 9.76E+06 | 1.36E+06 | 1.05E+07 | 1.06E+07 | >tr A0A114TRU7 A0A114TRU7_9PROT     | Nitrosomonas nitrosa                     | 50S ribosomal protein L19                       | 0                               | 83,126 | 1,36E+09 | 46       | 3 | 3 | 3 | 19 | 30.2 | 14,591 | A0A114TRU7;B1Y0H8;A0A110B0V05  | A0A114TRU7                        | 450        | 1.46   | 0.00000 |         |
| 4.32E+05 | 3.26E+05 | 4.18E+05 | 5.18E+05 | 4.08E+05 | 7.03E+04 | 9.56E+04 | 0.00E+00 | 0.00E+00 | 1.15E+05 | >tr A0A114U3F4 A0A114U3F4_9PROT     | Nitrosomonas nitrosa                     | NAD(P)-dependent dehydrogenase, short-cha       | 0                               | 46,23  | 2,18E+08 | 16       | 3 | 3 | 3 | 1  | 18.5 | 25,39  | A0A114U3F4                     | A0A114U3F4                        | 460        | 5.57   | 0.04759 |         |
| 4.06E+05 | 3.99E+05 | 3.90E+05 | 3.58E+05 | 3.10E+05 | 6.52E+05 | 5.23E+05 | 1.47E+05 | 3.44E+05 | 4.09E+05 | >tr A0A114UV9 A0A114UV9_9PROT       | Nitrosomonas nitrosa                     | Elongation factor G                             | 0                               | 20,943 | 1,31E+08 | 9        | 3 | 3 | 3 | 10 | 7.5  | 77,422 | A0A114UV9;A0A114TEC4;A0A113I   | A0A114UV9;A0A114TEC4;A0A113JWC6   | 472        | -0.70  | 0.00475 |         |
| 0.00E+00 | 0.00E+00 | 0.00E+00 | 4.47E+06 | 0.00E+00 | 5.81E+06 | 1.31E+07 | 8.70E+06 | 4.83E+06 | 6.11E+06 | >sp Q35V11 ATPB_NITWN               | Nitrobacter winogradskyi (strain A11)    | ATP synthase subunit beta                       | 0                               | 323,31 | 3,63E+09 | 16       | 5 | 5 | 3 | 4  | 15.1 | 50,822 | Q35V11;Q1QQS8;A3WRA3;A0A11V4   | Q35V11;Q1QQS8;A3WRA3;A0A11V426    | 507        | 1.39   | 0.00087 |         |
| 8.16E+05 | 1.35E+06 | 1.03E+06 | 8.95E+05 | 1.27E+06 | 7.23E+05 | 1.14E+06 | 3.59E+05 | 8.28E+05 | 7.02E+05 | >tr A0A114W9GQ2 A0A114W9GQ2_9BACT   | Nitrosomonas nitrosa                     | Molybdopterin synthase sulfur carrier subunit   | 0                               | 22,018 | 3,88E+08 | 12       | 3 | 3 | 3 | 13 | 36.7 | 9,8232 | A0A114W9GQ2;D8PE88;A0A256X0N   | A0A114W9GQ2                       | 540        | 4.30   | 0.00033 |         |
| 1.65E+06 | 1.75E+06 | 0.00E+00 | 1.66E+06 | 1.45E+06 | 2.86E+07 | 2.66E+07 | 1.36E+07 | 2.34E+07 | 2.43E+07 | >tr A0A114W9J7H6 A0A114W9J7H6_9BACT | Nitrosomonas nitrosa                     | Uncharacterized protein                         | 0                               | 323,31 | 4,10E+09 | 31       | 3 | 3 | 3 | 9  | 23.9 | 31,737 | A0A114W9J7H6;D8P181;A0A11W1HY5 | A0A114W9J7H6;D8P181;A0A11W1HY8    | 551        | 1.54   | 0.00002 |         |
| 3.18E+07 | 3.38E+07 | 2.34E+07 | 2.53E+07 | 1.39E+07 | 2.38E+05 | 1.98E+04 | 0.00E+00 | 6.61E+05 | 2.13E+06 | >sp B1XXY9 CH60_LEPCP               | Leptothrix cholodnii (strain ATCC 35069) | 60 kDa chaperonin                               | 0                               | 64,601 | 2,97E+08 | 7        | 8 | 5 | 3 | 1  | 16.4 | 57,309 | B1XXY9                         | B1XXY9                            | 575        | 1.17   | 0.16419 |         |
| 4.45E+06 | 3.29E+06 | 2.89E+06 | 3.31E+06 | 3.05E+06 | 6.90E+06 | 7.37E+06 | 1.05E+06 | 6.75E+06 | 9.36E+06 | >tr B1Y7H0 B1Y7H0_LEPCP             | Leptothrix cholodnii (strain ATCC 35069) | Elongation factor Tu                            | 0                               | 39,243 | 1,41E+09 | 21       | 4 | 3 | 3 | 1  | 13.6 | 42,881 | B1Y7H0                         | B1Y7H0                            | 589        | -0.07  | 0.00194 |         |
| 8.79E+06 | 2.77E+06 | 8.51E+06 | 8.59E+06 | 5.13E+06 | 2.26E+07 | 1.97E+07 | 1.41E+07 | 2.05E+07 | 2.27E+07 | >tr D8P125 D8P125_9BACT             | Nitrosomonas nitrosa                     | Metal-binding protein SmbP                      | 0                               | 167,77 | 7,41E+09 | 48       | 5 | 5 | 4 | 4  | 40.7 | 12,027 | D8P125;A0A11W1HYF8;A0A136JVQ0  | D8P125;A0A11W1HYF8;A0A136JVQ0     | 187        | 2.69   | 0.00000 |         |
| 0.00E+00 | 0.00E+00 | 0.00E+00 | 0.00E+00 | 0.00E+00 | 3.90E+05 | 5.84E+05 | 6.62E+04 | 3.73E+05 | 3.23E+04 | >tr A0A114K960 A0A114K960_9BACT     | Nitrosomonas nitrosa                     | 3-oxoacyl-ACP reductase                         | 0                               | 124,74 | 6,22E+08 | 16       | 4 | 4 | 4 | 1  | 20   | 29,179 | A0A114K960                     | A0A114K960                        | 194        | 4.52   | 0.02477 |         |
| 1.64E+06 | 2.38E+06 | 1.72E+06 | 1.40E+06 | 1.86E+06 | 1.75E+06 | 1.07E+06 | 7.10E+05 | 1.56E+06 | 1.87E+06 | >tr A0A114LQ74 A0A114LQ74_9PROT     | Nitrosomonas nitrosa                     | Chaperone protein DnaK                          | 0                               | 189,7  | 4,75E+08 | 24       | 5 | 5 | 4 | 17 | 11.2 | 70,259 | A0A114LQ74;A0A113HHP9;A0A11H3  | A0A114LQ74;A0A113HHP9;A0A11H3L8   | 331        | -0.08  | 0.00022 |         |
| 6.67E+06 | 8.96E+06 | 6.73E+06 | 0.00E+00 | 5.79E+06 | 1.43E+07 | 1.47E+07 | 6.15E+06 | 1.11E+07 | 1.46E+07 | >tr A0A114LY25 A0A114LY25_9PROT     | Nitrosomonas nitrosa                     | Thioredoxin                                     | 0                               | 323,31 | 2,91E+09 | 63       | 4 | 4 | 4 | 14 | 38   | 12,074 | A0A114LY25;A0A113K5R3;A0A11H3H | A0A114LY25                        | 334        | 3.10   | 0.00008 |         |
| 9.16E+05 | 1.44E+06 | 1.65E+06 | 6.86E+05 | 1.19E+06 | 5.24E+05 | 7.17E+05 | 1.29E+05 | 2.58E+05 | 0.00E+00 | >tr A0A114N348 A0A114N348_9PROT     | Nitrosomonas nitrosa                     | Polyketide cyclase / dehydrase and lipid trans  | 0                               | 34,294 | 3,10E+08 | 11       | 4 | 4 | 4 | 3  | 27.9 | 19,103 | A0A114N348;A0A113PH93;A0A11G   | A0A114N348                        | 347        | 4.17   | 0.03739 |         |
| 0.00E+00 | 0.00E+00 | 0.00E+00 | 0.00E+00 | 0.00E+00 | 1.29E+06 |          |          |          |          |                                     |                                          |                                                 |                                 |        |          |          |   |   |   |    |      |        |                                |                                   |            |        |         |         |
