# Supplementary material for: Quantitative proteomics for monitoring microbial dynamics in activated sludge from landfill leachate treatment
Source: Royal Society of Chemistry journal article supplement (doi:10.1039/c8ew00892b), 2019-01-01
Supplement: c8ew00892b4.pdf [file c8ew00892b4.pdf]

|          |          |          |          |          |          |          |          |          |          |                                 |                                  |                                                 |           |        |          |    |   |   |    |      |        |                               |                                 |                                  |            |         |         |         |
|----------|----------|----------|----------|----------|----------|----------|----------|----------|----------|---------------------------------|----------------------------------|-------------------------------------------------|-----------|--------|----------|----|---|---|----|------|--------|-------------------------------|---------------------------------|----------------------------------|------------|---------|---------|---------|
| 3.85E+05 | 4.03E+05 | 2.63E+05 | 2.64E+05 | 0.00E+00 | 1.94E+07 | 1.14E+07 | 1.21E+07 | 1.34E+07 | 1.63E+07 | >tr A0A0K2GB06 A0A0K2GB06_NITMO | Nitrospira moscoviensis          | Sulfurtransferase                               | 0         | 37,734 | 1,09E+09 | 23 | 1 | 1 | 1  | 1    | 1      | 9.8                           | 13,911                          | A0A0K2GB06                       | A0A0K2GB06 | 107     | 0.18    | 0.00001 |
| 0.00E+00 | 0.00E+00 | 0.00E+00 | 0.00E+00 | 0.00E+00 | 1.07E+06 | 1.42E+06 | 3.20E+05 | 7.20E+05 | 3.84E+05 | >tr A0A0K2GCL8 A0A0K2GCL8_NITMO | Nitrospira moscoviensis          | Uncharacterized protein                         | 0         | 63,72  | 4,86E+08 | 20 | 1 | 1 | 1  | 1    | 1      | 9                             | 14,959                          | A0A0K2GCL8                       | A0A0K2GCL8 | 108     | 3.86    | 0.00551 |
| 3.00E+04 | 7.73E+04 | 3.25E+04 | 1.15E+05 | 0.00E+00 | 1.27E+05 | 1.71E+05 | 6.27E+04 | 1.39E+05 | 0.00E+00 | >tr A0A0K2GCW2 A0A0K2GCW2_NITMO | Nitrospira moscoviensis          | Uncharacterized protein                         | 0,0054152 | 6,0393 | 7,75E+06 | 2  | 1 | 1 | 1  | 13   | 12.5   | 11,215                        | A0A0K2GCW2;A0A1W18D1;A0A1       | A0A0K2GCW2;A0A1W18D1;A0A1W9      | 109        | 1.53    | #ZAHLI  |         |
| 1.57E+05 | 2.13E+05 | 1.49E+05 | 1.51E+05 | 1.33E+05 | 0.00E+00 | 8.45E+05 | 4.82E+05 | 5.91E+05 | 8.36E+05 | >tr D8PE89 D8PE89_9BACT         | Nitrospira defluvi               | Threonine synthase                              | 0,0082781 | 5,8925 | 1,38E+08 | 1  | 1 | 1 | 1  | 13   | 3.6    | 44,49                         | D8PE89;A0A1W1893;A0A054L218     | D8PE89;A0A1W1893;A0A054L218;A    | 110        | 0.24    | 0.00736 |         |
| 7.17E+05 | 7.89E+05 | 7.99E+05 | 8.69E+05 | 7.02E+05 | 0.00E+00 | 1.88E+06 | 0.00E+00 | 0.00E+00 | 9.87E+06 | >tr A0A0K2GF07 A0A0K2GF07_NITMO | Nitrospira moscoviensis          | Rubrythrin                                      | 0         | 27,053 | 4,30E+08 | 11 | 3 | 3 | 3  | 2    | 2      | 15,701                        | A0A0K2GF07;A0A2C9C92            | A0A0K2GF07                       | 111        | 2.35    | 0.25450 |         |
| 0.00E+00 | 0.00E+00 | 3.92E+05 | 4.71E+05 | 4.29E+05 | 9.55E+05 | 7.00E+05 | 4.05E+05 | 1.52E+05 | 0.00E+00 | >tr A0A0K2GG72 A0A0K2GG72_NITMO | Nitrospira moscoviensis          | Carboxy-terminal-processing protease            | 0         | 11,287 | 2,79E+08 | 3  | 2 | 2 | 2  | 11   | 6.3    | 47,922                        | A0A0K2GG72;A0A136JQ63;D8PHM     | A0A0K2GG72;A0A136JQ63;D8PHM3;A   | 112        | 2.17    | 0.03509 |         |
| 0.00E+00 | 0.00E+00 | 0.00E+00 | 0.68E+05 | 2.23E+05 | 6.62E+05 | 2.31E+05 | 0.00E+00 | 0.00E+00 | 0.00E+00 | >tr A0A1W1HZT2 A0A1W1HZT2_9BACT | Nitrospira japonica              | Metal-binding protein SmbP                      | 0         | 166    | 1,98E+07 | 3  | 2 | 1 | 2  | 2    | 19.5   | 11,883                        | A0A1W1HZT2;A0A0K2GG80           | A0A1W1HZT2;A0A0K2GG80            | 113        | 0.29    | #ZAHLI  |         |
| 1.50E+06 | 2.08E+06 | 1.25E+06 | 1.58E+06 | 1.27E+06 | 1.08E+07 | 8.19E+06 | 3.18E+06 | 4.40E+06 | 6.50E+06 | >tr A0A1W9GG60 A0A1W9GG60_9BACT | Nitrospira sp. SG-bin2           | Uncharacterized protein                         | 0         | 323,31 | 2,69E+09 | 70 | 3 | 3 | 3  | 5    | 14.2   | 34,071                        | A0A1W9GG60;A0A0K2GGE5;A0A1      | A0A1W9GG60;A0A0K2GGE5;A0A1W9     | 114        | 3.01    | 0.00120 |         |
| 2.86E+05 | 4.49E+05 | 6.22E+05 | 8.04E+05 | 3.47E+05 | 0.00E+00 | 0.00E+00 | 0.00E+00 | 0.00E+00 | 0.00E+00 | >tr A0A0K2GHA6 A0A0K2GHA6_NITMO | Nitrospira moscoviensis          | Uncharacterized protein                         | 0         | 7,3647 | 2,20E+07 | 4  | 1 | 1 | 1  | 1    | 16.2   | 11,68                         | A0A0K2GHA6                      | A0A0K2GHA6                       | 115        | #ZAHLI  | #ZAHLI  |         |
| 1.53E+06 | 1.52E+06 | 1.32E+06 | 1.34E+06 | 1.75E+06 | 1.04E+06 | 9.99E+05 | 6.59E+05 | 8.80E+05 | 1.62E+06 | >tr A0A1W1HZY7 A0A1W1HZY7_9BACT | Nitrospira japonica              | Uncharacterized protein                         | 0         | 6,1381 | 6,00E+08 | 5  | 1 | 1 | 2  | 5.3  | 28,404 | A0A1W1HZY7;A0A0K2GHF5         | A0A1W1HZY7;A0A0K2GHF5           | 116                              | 3.25       | 0.00018 |         |         |
| 4.43E+06 | 2.76E+06 | 2.41E+06 | 3.90E+06 | 3.76E+06 | 1.15E+07 | 1.51E+07 | 3.19E+06 | 6.45E+06 | 9.49E+06 | >tr A0A0K2GH6 A0A0K2GH6_NITMO   | Nitrospira moscoviensis          | Putative Monoheme cytochrome c                  | 0         | 323,31 | 3,19E+09 | 9  | 4 | 4 | 1  | 1    | 4.3    | 15,99                         | A0A0K2GH6H                      | A0A0K2GH6H                       | 117        | 3.16    | 0.00212 |         |
| 1.95E+06 | 1.85E+06 | 1.07E+06 | 1.54E+06 | 1.58E+06 | 3.67E+06 | 5.26E+06 | 4.96E+06 | 3.67E+06 | 7.46E+06 | >tr A0A256WY47 A0A256WY47_9BACT | Nitrospira sp. UW-LDO-01         | Histidine Kinase                                | 0,0069204 | 5,9859 | 2,62E+09 | 8  | 1 | 1 | 13 | 1.6  | 84,792 | A0A256WY47;A0A1W9GJQ9;A0A0    | A0A256WY47;A0A1W9GJQ9;A0A0S4L   | 118                              | 0.46       | 0.00009 |         |         |
| 8.10E+04 | 1.11E+05 | 2.65E+05 | 6.55E+04 | 1.44E+05 | 9.20E+06 | 8.27E+06 | 4.72E+06 | 7.39E+06 | 5.92E+06 | >tr D8PHJ9 D8PHJ9_9BACT         | Nitrospira defluvi               | Uncharacterized protein                         | 0         | 286,09 | 8,00E+08 | 47 | 1 | 1 | 1  | 12   | 13.4   | 12,52                         | D8PHJ9;A0A256W5I6;A0A1W9IK4     | D8PHJ9;A0A256W5I6;A0A1W9IK4;A    | 119        | 1.15    | 0.00002 |         |
| 5.27E+05 | 7.43E+05 | 5.52E+05 | 7.70E+05 | 6.65E+05 | 0.00E+00 | 0.00E+00 | 0.00E+00 | 2.47E+05 | 1.94E+05 | >tr A0A1W9J574 A0A1W9J574_9BACT | Nitrospira sp. ST-bin5           | Iron-sulfur cluster assembly scaffold protein k | 0         | 323,31 | 2,21E+08 | 15 | 2 | 2 | 15 | 18.3 | 13,779 | A0A1W9J574;A0A1W1185;A0A25    | A0A1W9J574;A0A1W1185;A0A256W    | 120                              | 5.94       | #ZAHLI  |         |         |
| 0.00E+00 | 0.00E+00 | 0.00E+00 | 0.00E+00 | 0.00E+00 | 0.67E+06 | 4.12E+06 | 3.90E+06 | 3.16E+06 | 4.14E+06 | >tr D8P865 D8P865_9BACT         | Nitrospira defluvi               | Chaperone protein HscA (Hsc66)                  | 0         | 6,5014 | 8,84E+08 | 6  | 1 | 1 | 13 | 2.3  | 65,432 | D8P865;A0A256WVL8;A0A1W9J47   | D8P865;A0A256WVL8;A0A1W9J47;A   | 121                              | -1.42      | 0.00039 |         |         |
| 0.00E+00 | 0.00E+00 | 0.00E+00 | 0.00E+00 | 0.00E+00 | 8.05E+05 | 0.00E+00 | 0.00E+00 | 0.00E+00 | 0.00E+00 | >tr D8P8H0 D8P8H0_9BACT         | Nitrospira defluvi               | Transcription termination/antitermination pro   | 0         | 11,546 | 1,11E+08 | 2  | 2 | 2 | 2  | 13   | 7.4    | 42,058                        | D8P8H0;A0A1W1HVM7;A0A1W9J45     | D8P8H0;A0A1W1HVM7;A0A1W9J45;J    | 122        | 2.32    | 0.34665 |         |
| 1.28E+06 | 1.67E+06 | 1.18E+06 | 9.69E+05 | 1.18E+06 | 1.25E+07 | 1.29E+07 | 9.37E+06 | 8.08E+06 | 1.36E+07 | >tr A0A0K2GIT2 A0A0K2GIT2_NITMO | Nitrospira moscoviensis          | Uncharacterized protein                         | 0         | 88,569 | 1,21E+09 | 22 | 2 | 2 | 2  | 13   | 13.6   | 17,752                        | A0A0K2GIT2;A0A1W9J418;A0A1W7    | A0A0K2GIT2;A0A1W9J418;A0A1W70    | 123        | 1.72    | 0.00001 |         |
| 3.24E+05 | 5.96E+05 | 0.00E+00 | 3.89E+05 | 9.25E+04 | 1.47E+07 | 1.07E+07 | 4.2E+06  | 1.04E+07 | 1.44E+07 | >tr A0A136JNW2 A0A136JNW2_9BACT | Nitrospira sp. OLB3              | Rubrythrin                                      | 0         | 323,31 | 3,57E+09 | 27 | 2 | 2 | 2  | 14   | 27     | 15,607                        | A0A136JNW2;A0A0K2GJ4;D8P87      | A0A136JNW2;A0A0K2GJ4;D8P87;A     | 124        | 3.31    | 0.00042 |         |
| 2.67E+06 | 3.15E+06 | 2.37E+06 | 2.61E+06 | 2.48E+06 | 5.42E+06 | 5.18E+06 | 1.32E+06 | 3.34E+06 | 3.54E+06 | >tr A0A1V6M208 A0A1V6M208_9BACT | Candidatus Brocadia saporovensis | Malate dehydrogenase                            | 0         | 8,1127 | 1,75E+09 | 11 | 1 | 1 | 1  | 2    | 3.9    | 33,413                        | A0A1V6M208;A0A0M2UVM4           | A0A1V6M208;A0A0M2UVM4            | 125        | 1.96    | 0.00095 |         |
| 0.00E+00 | 0.00E+00 | 9.36E+05 | 7.25E+05 | 8.67E+05 | 4.08E+06 | 2.58E+06 | 1.67E+06 | 1.74E+06 | 2.69E+06 | >tr A0A0M2UWM9 A0A0M2UWM9_9BACT | Candidatus Brocadia fulgida      | Adenylate kinase                                | 0         | 6,1225 | 1,95E+08 | 2  | 1 | 1 | 1  | 4.4  | 25,532 | A0A0M2UWM9                    | A0A0M2UWM9                      | 126                              | -2.48      | 0.00038 |         |         |
| 1.11E+06 | 8.86E+05 | 1.65E+05 | 6.10E+05 | 3.77E+05 | 1.61E+06 | 1.34E+06 | 5.78E+05 | 1.06E+06 | 1.21E+06 | >tr A0A0M2UYH7 A0A0M2UYH7_9BACT | Candidatus Brocadia fulgida      | ATPase                                          | 0         | 11,831 | 1,96E+08 | 4  | 1 | 1 | 1  | 3.6  | 37,584 | A0A0M2UYH7                    | A0A0M2UYH7                      | 127                              | 0.50       | #ZAHLI  |         |         |
| 1.71E+06 | 3.10E+06 | 3.77E+05 | 1.42E+06 | 2.35E+05 | 0.00E+00 | 0.00E+00 | 3.21E+05 | 0.00E+00 | 4.33E+05 | >tr A0A1V4AXP1 A0A1V4AXP1_9BACT | Candidatus Brocadia carolinensis | 2-dehydro-3-deoxyphosphonate aldolase           | 0         | 9,9393 | 8,84E+07 | 4  | 1 | 1 | 1  | 3    | 5.2    | 29,891                        | A0A1V4AXP1;A0A1V6M0Q9;A0A0      | A0A1V4AXP1;A0A1V6M0Q9;A0A0M2U    | 128        | 2.76    | 0.04642 |         |
| 0.00E+00 | 0.00E+00 | 0.00E+00 | 0.00E+00 | 0.00E+00 | 3.34E+05 | 1.11E+05 | 8.34E+04 | 9.89E+04 | 2.14E+05 | >tr F9ZF09 F9ZF09_9PROT         | Nitrosomonas sp. AL212           | Rubrythrin                                      | 0         | 17,683 | 1,84E+08 | 7  | 3 | 3 | 3  | 11   | 18.7   | 15,15                         | F9ZF09;F8GF27;A0A114DMZ7;A0A1   | F9ZF09;F8GF27;A0A114DMZ7;A0A1H9  | 129        | 5.15    | 0.00745 |         |
| 0.00E+00 | 0.00E+00 | 0.00E+00 | 0.00E+00 | 0.00E+00 | 4.21E+05 | 2.73E+05 | 3.64E+05 | 3.64E+05 | 3.64E+05 | >tr F9ZE99 F9ZE99_9PROT         | Nitrosomonas sp. AL212           | Lysine-tRNA ligase                              | 0         | 20,375 | 1,66E+08 | 8  | 1 | 1 | 17 | 3.6  | 57,583 | F9ZE99;A0A286A533;A0A285BYR5  | F9ZE99;A0A286A533;A0A285BYR5;A  | 130                              | 1.17       | 0.00002 |         |         |
| 0.00E+00 | 0.00E+00 | 0.00E+00 | 0.00E+00 | 0.00E+00 | 1.37E+07 | 1.53E+07 | 3.20E+06 | 4.00E+05 | 1.66E+07 | >tr F9ZE90 F9ZE90_9PROT         | Nitrosomonas sp. AL212           | Cold-shock DNA-binding domain protein           | 0         | 8,1127 | 1,69E+09 | 10 | 1 | 1 | 1  | 1    | 14.9   | 7,218                         | F9ZE90;F8GFU9;A0A1N6GF07;A0A1   | F9ZE90;F8GFU9;A0A1N6GF07;A0A1I4C | 131        | 2.92    | 0.01864 |         |
| 7.88E+05 | 7.95E+05 | 1.26E+06 | 9.08E+05 | 1.14E+06 | 2.14E+06 | 1.83E+06 | 1.82E+06 | 0.00E+00 | 2.86E+06 | >tr F9ZD19 F9ZD19_9PROT         | Nitrosomonas sp. AL212           | Ribulose-phosphate 3-epimerase                  | 0         | 6,7162 | 3,76E+08 | 5  | 1 | 1 | 1  | 5.3  | 24,334 | F9ZD19;A0A286A5V4;A0A1H8ZPD4  | F9ZD19;A0A286A5V4;A0A1H8ZPD4;A  | 132                              | 1.74       | 0.00638 |         |         |
| 1.22E+06 | 1.05E+06 | 6.76E+05 | 1.97E+06 | 7.99E+05 | 0.00E+00 | 2.98E+05 | 0.00E+00 | 0.00E+00 | 0.00E+00 | >tr A0A286A5B8 A0A286A5B8_9PROT | Nitrosomonas ureae               | Acyl carrier protein                            | 0         | 7,5407 | 8,00E+07 | 4  | 1 | 1 | 2  | 17.5 | 8,9038 | A0A286A5B8;A0A0S3AGN4         | A0A286A5B8;A0A0S3AGN4           | 133                              | 5.72       | 0.34676 |         |         |
| 0.00E+00 | 0.00E+00 | 0.00E+00 | 0.00E+00 | 1.59E+05 | 0.00E+00 | 0.00E+00 | 0.00E+00 | 0.00E+00 | 0.00E+00 | >tr F9ZDG3 F9ZDG3_9PROT         | Nitrosomonas sp. AL212           | ATP synthase subunit alpha                      | 0,0098039 | 5,8645 | 0.00E+00 | 0  | 5 | 1 | 10 | 11.7 | 55,311 | F9ZDG3;A0A286A636;A0A285BYG   | F9ZDG3;A0A286A636;A0A285BYG;A   | 135                              | #ZAHLI     | #ZAHLI  |         |         |
| 7.43E+06 | 7.74E+06 | 5.22E+06 | 7.49E+06 | 6.51E+06 | 2.32E+06 | 1.94E+06 | 2.10E+06 | 2.97E+06 | 2.10E+06 | >tr F9ZIM9 F9ZIM9_9PROT         | Nitrosomonas sp. AL212           | Glutamate dehydrogenase                         | 0         | 279,8  | 7,52E+08 | 41 | 1 | 7 | 4  | 4.5  | 48,526 | F9ZIM9;F8GLW9;A0A285C053;A0A1 | F9ZIM9;F8GLW9;A0A285C053;A0A1H9 | 136                              | 0.49       | 0.00000 |         |         |
| 2.56E+06 | 3.25E+06 | 1.55E+06 | 1.21E+06 | 2.00E+06 | 4.21E+07 | 4.03E+07 | 1.49E+07 | 3.00E+07 | 2.87E+07 | >tr F9ZIM7 F9ZIM7_9PROT         | Nitrosomonas sp. AL212           | Glyceraldehyde-3-phosphate dehydrogenase        | 0         | 27,456 | 5,97E+09 | 8  | 1 | 3 | 37 | 10.5 | 36,078 | F9ZIM7;F8GHX2;A0A285C095;A0A1 | F9ZIM7;F8GHX2;A0A285C095;A0A1I  | 137                              | -0.28      | 0.00021 |         |         |
| 1.30E+07 | 2.02E+07 | 1.23E+07 | 9.24E+06 | 1.46E+07 | 0.00E+00 | 0.00E+00 | 8.92E+04 | 0.00E+00 | 0.00E+00 | >tr F9ZG12 F9ZG12_9PROT         | Nitrosomonas sp. AL212           | O-acetylthioester/O-acetylserine sulphydry      | 0,0083893 | 5,9087 | 2,36E+07 | 1  | 3 | 3 | 3  | 2.8  | 45,706 | F9ZG12;A0A286A1F6;A0A1H9S60   | F9ZG12;A0A286A1F6;A0A1H9S60;A   | 138                              | 3.53       | #ZAHLI  |         |         |
| 0.00E+00 | 0.00E+00 | 0.00E+00 | 0.00E+00 | 0.00E+00 | 2.47E+06 | 3.99E+06 | 4.95E+06 | 3.78E+06 | 5.45E+06 | >tr F9ZGW2 F9ZGW2_9PROT         | Nitrosomonas sp. AL212           | 30S ribosomal protein S8                        | 0         | 8,2672 | 5,82E+08 | 11 | 1 | 1 | 1  | 13   | 9.2    | 14,48                         | F9ZGW2;F8GHL8;B1Y8C3;A0A286A    | F9ZGW2;F8GHL8;B1Y8C3;A0A286A     | 139        | 1.34    | 0.00004 |         |
| 1.73E+06 | 1.98E+06 | 1.69E+05 | 1.44E+06 | 6.07E+05 | 6.40E+06 | 6.36E+06 | 6.51E+06 | 5.50E+06 | 9.15E+06 | >tr A0A117YD8 A0A117YD8_9PROT   | Nitrosomonas eutropha            | Acetolactate synthase, small subunit            | 0         | 56,493 | 4,67E+08 | 11 | 1 | 1 | 1  | 21   | 12.3   | 17,315                        | A0A117YD8;A0A114KY27;A0A113Y    | A0A117YD8;A0A114KY27;A0A113YQ    | 140        | -1.33   | 0.00001 |         |
| 1.57E+07 | 1.00E+07 | 7.79E+06 | 9.58E+06 | 7.45E+06 | 3.99E+05 | 0.00E+00 | 0.00E+00 | 0.00E+00 | 0.00E+00 | >tr A0A1H8GL3 A0A1H8GL3_9PROT   | Nitrosomonas oligotropha         | 50S ribosomal protein L11                       | 0,0083333 | 5,9041 | 4,19E+07 | 3  | 1 | 1 | 1  | 8.3  | 14,999 | A0A1H8GL3;A0A1H5Y494;A0A0S5   | A0A1H8GL3;A0A1H5Y494;A0A0S5A    | 141                              | 3.10       | 0.34670 |         |         |
| 4.25E+06 | 4.49E+06 | 3.92E+06 | 4.44E+06 | 2.21E+06 | 5.81E+05 | 2.87E+05 | 4.66E+05 | 3.65E+05 | 7.76E+05 | >tr F9ZD08 F9ZD08_9PROT         | Nitrosomonas sp. AL212           | Urease subunit alpha                            | 0         | 6,2796 | 1,37E+08 | 4  | 1 | 1 | 6  | 2.5  | 61,58  | F9ZD08;A0A285B5W5;A0A114P9H   | F9ZD08;A0A285B5W5;A0A114P9H;A   | 142                              | 0.60       | 0.00042 |         |         |
| 2.47E+07 | 2.51E+07 | 1.04E+07 | 2.51E+07 | 1.57E+07 | 3.44E+05 | 2.38E+05 | 0.00E+00 | 2.65E+05 | 2.70     |                                 |                                  |                                                 |           |        |          |    |   |   |    |      |        |                               |                                 |                                  |            |         |         |         |



|          |          |          |          |          |          |          |          |          |          |                                 |                                  |                                                |           |        |          |    |   |   |    |      |        |                                |                                 |                                 |                             |         |         |         |
|----------|----------|----------|----------|----------|----------|----------|----------|----------|----------|---------------------------------|----------------------------------|------------------------------------------------|-----------|--------|----------|----|---|---|----|------|--------|--------------------------------|---------------------------------|---------------------------------|-----------------------------|---------|---------|---------|
| 0.00E+00 | 4.95E+05 | 3.14E+05 | 0.00E+00 | 1.97E+05 | 6.17E+06 | 8.24E+06 | 5.11E+06 | 5.82E+06 | 9.05E+06 | >tr A0A1E4ERT1 A0A1E4ERT1_9RHOB | Paracoccus sp. SCN 68-21         | Electron transfer flavoprotein subunit beta    | 0,0083195 | 5,8955 | 7,15E+08 | 6  | 1 | 1 | 1  | 1    | 1      | 1                              | 26,804                          | A0A1E4ERT1                      | A0A1E4ERT1                  | 217     | -1,74   | 0,00002 |
| 2.41E+06 | 2.73E+06 | 3.14E+06 | 2.76E+06 | 1.68E+06 | 1.04E+07 | 1.68E+07 | 1.40E+07 | 2.02E+07 | 3.24E+07 | >tr A0A1E4ET4 A0A1E4ET4_9RHOB   | Paracoccus sp. SCN 68-21         | Uncharacterized protein                        | 0,0071174 | 6,0163 | 2,85E+09 | 3  | 2 | 1 | 1  | 1    | 1      | 12,4                           | 9,6203                          | A0A1E4ET4                       | A0A1E4ET4                   | 218     | 2,34    | 0,00109 |
| 2.06E+06 | 2.81E+06 | 1.25E+06 | 1.01E+06 | 1.25E+06 | 3.44E+06 | 2.55E+06 | 1.01E+06 | 1.16E+06 | 4.57E+05 | >tr A0A238WGN0 A0A238WGN0_9RHOB | Paracoccus sediminis             | NiTT/TauT family transport system substrate    | 0         | 13,978 | 2,06E+08 | 8  | 2 | 2 | 17 | 7,1  | 34,84  | A0A238WGN0;A0A1N7KLG7;A0A1     | A0A238WGN0;A0A1N7KLG7;A0A1N9B   | 219                             | 0,24                        | 0,01390 |         |         |
| 2.77E+05 | 5.54E+05 | 3.55E+05 | 0.00E+00 | 2.67E+05 | 7.30E+07 | 3.38E+07 | 0.00E+00 | 6.36E+07 | 0.00E+00 | >tr A0A1E4EWK3 A0A1E4EWK3_9RHOB | Paracoccus sp. SCN 68-21         | Cytochrome c biogenesis ATP-binding export     | 0         | 10,28  | 5,74E+09 | 10 | 1 | 1 | 1  | 3,8  | 21,887 | A0A1E4EWK3                     | A0A1E4EWK3                      | 220                             | 0,89                        | 0,06775 |         |         |
| 3.46E+05 | 4.67E+05 | 4.79E+05 | 5.64E+05 | 2.11E+05 | 9.62E+06 | 7.00E+06 | 4.92E+06 | 6.30E+06 | 7.05E+06 | >tr A0A1H3N2L3 A0A1H3N2L3_9PROT | Nitrosomonas halophila           | 30S ribosomal protein S5                       | 0         | 55,311 | 3,91E+08 | 26 | 1 | 1 | 1  | 11   | 11,117 | A0A1H3N2L3;Q82X75;Q0AIH9;A0A1  | A0A1H3N2L3;Q82X75;Q0AIH9;A0A17  | 221                             | -2,04                       | 0,00002 |         |         |
| 1.03E+07 | 1.16E+07 | 9.19E+06 | 1.18E+07 | 2.47E+06 | 4.03E+05 | 0.00E+00 | 0.00E+00 | 3.13E+05 | 2.19E+05 | >tr Q82TQ0 Q82TQ0_NITEU         | Nitrosomonas europaea (strain AT | Site-determining protein                       | 0         | 6,4469 | 1,70E+07 | 4  | 1 | 1 | 1  | 7    | 6,3    | 29,478                         | Q82TQ0;Q0AG21;A0A1I4T4B4;A0A1   | Q82TQ0;Q0AG21;A0A1I4T4B4;A0A13  | 222                         | -2,86   | #ZAHU!  |         |
| 0.00E+00 | 1.28E+05 | 0.00E+00 | >sp Q0AIH9 CH60_NITEC           | Nitrosomonas europaea (strain C9 | 60 kDa chaperonin                              | 0         | 15,204 | 2,94E+08 | 2  | 3 | 1 | 1  | 1    | 7      | 6,9                            | 57,461                          | Q0AIH9;A0A1I76Q2;A0A1G4W9W3     | Q0AIH9;A0A1I76Q2;A0A1G4W9W3 | 223     | 4,77    | 0,16074 |
| 0.00E+00 | 0.00E+00 | 0.00E+00 | 0.00E+00 | 0.00E+00 | 1.73E+07 | 2.96E+07 | 9.44E+06 | 1.58E+07 | 3.25E+07 | >sp Q82Y61 CH10_NITEU           | Nitrosomonas europaea (strain AT | 10 kDa chaperonin                              | 0         | 79,245 | 1,20E+09 | 16 | 1 | 1 | 1  | 7    | 26     | 10,544                         | Q82Y61;Q0AIH8;A0A1I4S94;A0A1    | Q82Y61;Q0AIH8;A0A1I4S94;A0A1H9  | 224                         | 0,36    | 0,00136 |         |
| 0.00E+00 | 0.00E+00 | 0.00E+00 | 0.00E+00 | 1.14E+05 | 1.28E+06 | 9.46E+05 | 4.75E+05 | 9.38E+05 | 6.49E+05 | >tr Q82UN3 Q82UN3_NITEU         | Nitrosomonas europaea (strain AT | Iron-regulated ABC transporter ATPase subun    | 0         | 27,972 | 7,33E+07 | 3  | 1 | 1 | 1  | 5    | 6,5    | 28,952                         | Q82UN3;Q0AGN9;A0A1I7FKD0;A0A1   | Q82UN3;Q0AGN9;A0A1I7FKD0;A0A1H  | 225                         | -3,89   | #ZAHU!  |         |
| 0.00E+00 | 0.00E+00 | 0.00E+00 | 0.00E+00 | 0.00E+00 | 8.90E+04 | 7.15E+04 | 0.00E+00 | 7.75E+04 | 6.42E+04 | >tr A0A2D2C5L6 A0A2D2C5L6_9RHOB | Paracoccus yeei                  | 2-ketoglutarate dehydrogenase                  | 0         | 16,566 | 8,11E+06 | 1  | 1 | 1 | 1  | 4    | 6,4    | 56,805                         | A0A2D2C5L6;A0A2Z2G8H1;A0A1V0G   | A0A2D2C5L6;A0A2Z2G8H1;A0A1V0G   | 226                         | -3,08   | #ZAHU!  |         |
| 6.36E+05 | 1.16E+06 | 5.33E+05 | 4.73E+05 | 5.68E+05 | 8.91E+07 | 4.11E+07 | 5.94E+07 | 2.45E+07 | 7.43E+07 | >tr A0A1G5DFJ5 A0A1G5DFJ5_9RHOB | Paracoccus tibetensis            | ATP synthase subunit beta                      | 0         | 7,1071 | 6,77E+09 | 28 | 3 | 1 | 1  | 3    | 8,6    | 50,266                         | A0A1G5DFJ5;A0A2H5EVS2;A0A2D8X2  | A0A1G5DFJ5;A0A2H5EVS2;A0A2D8X2  | 227                         | -5,61   | 0,00103 |         |
| 6.78E+05 | 6.15E+05 | 2.71E+05 | 3.95E+05 | 3.94E+06 | 4.89E+06 | 2.94E+06 | 4.89E+06 | 2.94E+06 | 4.89E+06 | >tr A0A1G5DFT7 A0A1G5DFT7_9RHOB | Paracoccus tibetensis            | ATP synthase subunit alpha                     | 0         | 10,1   | 5,12E+08 | 8  | 2 | 1 | 1  | 1    | 6,2    | 55,493                         | A0A1G5DFT7                      | A0A1G5DFT7                      | 228                         | #ZAHU!  | #ZAHU!  |         |
| 5.54E+05 | 0.00E+00 | 0.00E+00 | 2.49E+05 | 1.45E+06 | 1.39E+06 | 1.90E+06 | 1.07E+06 | 1.23E+06 | 1.31E+06 | >tr A0A1G5HG74 A0A1G5HG74_9RHOB | Paracoccus tibetensis            | Electron transfer flavoprotein beta subunit    | 0         | 257,56 | 2,86E+08 | 28 | 1 | 1 | 1  | 1    | 6,4    | 26,434                         | A0A1G5HG74                      | A0A1G5HG74                      | 229                         | 0,81    | 0,00001 |         |
| 2.58E+05 | 3.19E+05 | 1.57E+05 | 1.61E+05 | 1.33E+05 | 1.17E+07 | 0.00E+00 | 4.15E+06 | 8.24E+06 | 8.89E+06 | >tr A0A10EHV2 A0A10EHV2_9RHOB   | Paracoccus homiensis             | 3-oxoacyl-[acyl-carrier-protein] reductase/acc | 0         | 41,77  | 7,98E+08 | 7  | 1 | 1 | 1  | 9    | 6,4    | 25,391                         | A0A10EHV2;Q35N32;Q1QH81;A3      | A0A10EHV2;Q35N32;Q1QH81;A3WQ2   | 230                         | -0,97   | #ZAHU!  |         |
| 0.00E+00 | 0.00E+00 | 2.06E+04 | 0.00E+00 | 3.55E+04 | 2.08E+06 | 1.33E+06 | 0.00E+00 | 8.15E+05 | 7.79E+05 | >tr A0A1G5SB2 A0A1G5SB2_9RHOB   | Nitrosomonas mobilis             | Uncharacterized protein                        | 0         | 17,407 | 4,46E+07 | 3  | 1 | 1 | 1  | 2    | 9      | 23,83                          | A0A1G5SB2;A0A1I4PYF4            | A0A1G5SB2;A0A1I4PYF4            | 231                         | #ZAHU!  | #ZAHU!  |         |
| 3.23E+05 | 3.35E+05 | 2.52E+05 | 4.17E+05 | 3.25E+05 | 1.20E+05 | 1.17E+05 | 0.00E+00 | 7.16E+04 | 1.08E+05 | >tr A0A1G5SBX2 A0A1G5SBX2_9PROT | Nitrosomonas mobilis             | 60 kDa chaperonin                              | 0         | 18,314 | 5,78E+07 | 7  | 4 | 1 | 1  | 1    | 10,7   | 57,636                         | A0A1G5SBX2                      | A0A1G5SBX2                      | 232                         | 2,05    | 0,00610 |         |
| 6.60E+04 | 1.01E+05 | 1.08E+05 | 1.08E+05 | 1.68E+05 | 0.00E+00 | 0.00E+00 | 0.00E+00 | 1.18E+06 | 2.02E+06 | >tr A0A1G5SDA5 A0A1G5SDA5_9PROT | Nitrosomonas mobilis             | Elongation factor Tu                           | 0         | 314,77 | 2,05E+08 | 5  | 2 | 1 | 1  | 8    | 7,7    | 39,397                         | A0A1G5SDA5;A0A1N6HIM8;A0A1I3    | A0A1G5SDA5;A0A1N6HIM8;A0A1N6G   | 233                         | 1,25    | #ZAHU!  |         |
| 0.00E+00 | >tr A0A1G5SG84 A0A1G5SG84_9PROT | Nitrosomonas mobilis             | Thioredoxin reductase                          | 0         | 10,132 | 2,23E+07 | 4  | 1 | 1 | 1  | 1    | 6      | 34,389                         | A0A1G5SG84                      | A0A1G5SG84                      | 234                         | #ZAHU!  | 0,00000 |         |
| 1.77E+06 | 2.15E+06 | 1.58E+06 | 1.66E+06 | 1.45E+06 | 0.00E+00 | 0.00E+00 | 5.65E+04 | 1.06E+05 | 1.10E+05 | >tr A0A1G5S85 A0A1G5S85_9PROT   | Nitrosomonas mobilis             | Chaperone protein HspG                         | 0         | 8,8661 | 1,12E+07 | 2  | 1 | 1 | 1  | 4    | 2      | 73,179                         | A0A1G5S85;A0A1I4K20;A0A1H3K     | A0A1G5S85;A0A1I4K20;A0A1H3K12   | 235                         | #ZAHU!  | #ZAHU!  |         |
| 4.22E+06 | 4.69E+06 | 5.45E+06 | 0.00E+00 | 2.90E+06 | 0.00E+00 | 0.00E+00 | 5.28E+06 | 0.00E+00 | 3.52E+06 | >tr A0A1G5S84 A0A1G5S84_9PROT   | Nitrosomonas mobilis             | Uncharacterized protein                        | 0         | 7,9419 | 4,97E+07 | 2  | 1 | 1 | 1  | 7    | 2      | 2,8392                         | A0A1G5S84                       | A0A1G5S84                       | 236                         | 2,22    | 0,15244 |         |
| 4.40E+05 | 4.83E+05 | 4.57E+05 | 5.36E+05 | 3.77E+05 | 1.99E+05 | 9.45E+05 | 1.58E+06 | 1.39E+06 | 0.00E+00 | >tr A0A2H5EYF2 A0A2H5EYF2_9RHOB | Paracoccus zhejiangensis         | Glyceroldehyde-3-phosphate dehydrogenase       | 0         | 6,1339 | 3,07E+08 | 3  | 1 | 1 | 1  | 2    | 4,5    | 35,529                         | A0A2H5EYF2;A0A1G7ATQ2           | A0A2H5EYF2;A0A1G7ATQ2           | 237                         | 1,45    | 0,03082 |         |
| 7.90E+05 | 9.21E+05 | 6.83E+05 | 9.39E+05 | 6.40E+05 | 0.00E+00 | 0.00E+00 | 3.43E+05 | 2.72E+05 | 2.72E+05 | >tr A0A1G7BKE7 A0A1G7BKE7_9RHOB | Paracoccus yeei                  | ATP synthase subunit alpha                     | 0         | 96,726 | 1,49E+08 | 2  | 4 | 2 | 33 | 10,6 | 55,101 | A0A1G7BKE7;A0A2Z3CCH9;A0A2D8X2 | A0A1G7BKE7;A0A2Z3CCH9;A0A2D8X2  | 238                             | 2,21                        | 0,04795 |         |         |
| 0.00E+00 | 0.00E+00 | 0.00E+00 | 0.00E+00 | 0.00E+00 | 0.00E+00 | 2.77E+07 | 2.47E+07 | 5.61E+06 | 0.00E+00 | >tr A0A1G7BLW8 A0A1G7BLW8_9RHOB | Paracoccus isopora               | Hydroxyacylglutathione hydrolase               | 0         | 6,2331 | 8,02E+08 | 3  | 1 | 1 | 1  | 10,5 | 25,936 | A0A1G7BLW8                     | A0A1G7BLW8                      | 239                             | -0,90                       | #ZAHU!  |         |         |
| 1.03E+07 | 1.29E+07 | 8.67E+06 | 1.05E+07 | 5.87E+06 | 7.49E+05 | 4.81E+05 | 0.00E+00 | 0.00E+00 | 0.00E+00 | >tr A0A1G7HLF5 A0A1G7HLF5_9RHOB | Paracoccus isopora               | Uncharacterized protein                        | 0,0068376 | 5,9389 | 2,06E+07 | 0  | 1 | 1 | 1  | 7,6  | 20,731 | A0A1G7HLF5                     | A0A1G7HLF5                      | 240                             | 0,13                        | #ZAHU!  |         |         |
| 7.20E+06 | 1.20E+07 | 6.91E+06 | 6.76E+06 | 9.92E+06 | 1.04E+06 | 6.38E+05 | 0.00E+00 | 6.81E+05 | 7.78E+05 | >tr A0A14N008 A0A14N008_9PROT   | Nitrosomonas nitrosa             | Iron-regulated ABC transporter ATPase subun    | 0         | 6,1737 | 1,23E+08 | 4  | 1 | 1 | 1  | 3    | 3,8    | 29,501                         | A0A14N008;A0A1I4JH9;A0A1I3G     | A0A14N008;A0A1I4JH9;A0A1I3G8R4  | 241                         | 0,53    | 0,00639 |         |
| 0.00E+00 | 1.57E+04 | 3.41E+05 | 8.61E+05 | 4.64E+05 | 0.00E+00 | 1.15E+05 | 0.00E+00 | 1.24E+05 | 1.80E+05 | >tr A0A14K246 A0A14K246_9PROT   | Nitrosomonas nitrosa             | Uncharacterized protein                        | 0         | 6,7325 | 4,60E+07 | 2  | 1 | 1 | 1  | 3    | 3,3    | 51,57                          | A0A14K246;A0A1H3K035;A0A1G7K    | A0A14K246;A0A1H3K035;A0A1G7K28  | 242                         | 1,61    | 0,04825 |         |
| 3.44E+05 | 5.25E+05 | 1.32E+05 | 3.89E+05 | 2.45E+05 | 5.46E+06 | 0.00E+00 | 2.87E+06 | 5.01E+06 | 6.26E+06 | >tr A0A1I4T28 A0A1I4T28_9PROT   | Nitrosomonas nitrosa             | Putative exosortase-associated protein, TIGR0  | 0         | 66,259 | 2,74E+08 | 9  | 1 | 1 | 1  | 4    | 14,2   | 13,232                         | A0A1I4T28;A0A1I4SF80;A0A1H3J    | A0A1I4T28;A0A1I4SF80;A0A1H3JRT2 | 243                         | 0,41    | 0,00844 |         |
| 0.00E+00 | 0.00E+00 | 0.00E+00 | 0.00E+00 | 0.00E+00 | 7.70E+05 | 4.89E+05 | 2.64E+05 | 4.85E+05 | 7.75E+05 | >tr A0A1G8C5M9 A0A1G8C5M9_9PROT | Nitrosomonas sp. Nm132           | Cytochrome c-type biogenesis protein CcmH      | 0         | 10,017 | 8,52E+08 | 13 | 1 | 1 | 1  | 2    | 4,3    | 48,272                         | A0A1G8C5M9;A0A1H3LV63           | A0A1G8C5M9;A0A1H3LV63           | 244                         | 3,43    | 0,00044 |         |
| 2.02E+05 | 3.68E+05 | 3.13E+05 | 3.57E+05 | 0.00E+00 | 1.52E+05 | 0.00E+00 | 7.93E+04 | 0.00E+00 | 1.03E+05 | >tr A0A14NHQ6 A0A14NHQ6_9PROT   | Nitrosomonas nitrosa             | Peptidylglyoxylase                             | 0         | 6,8664 | 1,00E+07 | 1  | 1 | 1 | 1  | 2    | 4,7    | 68,643                         | A0A14NHQ6;A0A1I4RY26;A0A1I3J    | A0A14NHQ6;A0A1I4RY26;A0A1I3J8I3 | 245                         | #ZAHU!  | #ZAHU!  |         |
| 7.70E+05 | 8.70E+05 | 8.51E+05 | 6.07E+06 | 0.00E+00 | 0.00E+00 | 0.00E+00 | 0.00E+00 | 0.00E+00 | 0.00E+00 | >tr A0A1H3MM73 A0A1H3MM73_9PROT | Nitrosomonas sp. Nm58            | Superoxide dismutase                           | 0         | 6,6279 | 0,00E+00 | 1  | 1 | 1 | 1  | 7    | 10,4   | 23,364                         | A0A1H3MM73;A0A1I68G6B1;A0A1I4C  | A0A1H3MM73;A0A1I68G6B1;A0A1I4C  | 246                         | #ZAHU!  | #ZAHU!  |         |
| 9.23E+05 | 2.22E+05 | 0.00E+00 | 0.00E+00 | 0.00E+00 | 3.33E+05 | 2.26E+05 | 0.00E+00 | 0.00E+00 | 0.00E+00 | >tr A0A1H3P364 A0A1H3P364_9PROT | Nitrosomonas sp. Nm33            | Uncharacterized protein                        | 0         | 13,509 | 1,63E+07 | 4  | 1 | 1 | 1  | 6    | 25,6   | 9,4958                         | A0A1H3P364;F8GKU4;A0A1I4NLP4;A0 | A0A1H3P364;F8GKU4;A0A1I4NLP4;A0 | 247                         | 2,28    | #ZAHU!  |         |
| 2.46E+06 | 2.93E+06 | 2.25E+06 | 9.51E+06 | 3.52E+06 | 0.00E+00 | 0.00E+00 | 0.00E+00 | 1.75E+05 | 0.00E+00 | >tr A0A1N6IDW7 A0A1N6IDW7_9PROT | Nitrosomonas cryotolerans ATCC   | Uroporphyrinogen decarboxylase                 | 0         | 6,4825 | 2,13E+07 | 3  | 1 | 1 | 1  | 5    | 4,2    | 39,108                         | A0A1N6IDW7;A0A1I4RR0;A0A1I4N    | A0A1N6IDW7;A0A1I4RR0;A0A1I4N6J  | 248                         | 3,33    | #ZAHU!  |         |
| 1.78E+06 | 1.71E+06 | 1.44E+06 | 1.90E+06 | 1.35E+06 | 2.16E+07 | 1.84E+07 | 8.86E+06 | 1.87E+07 | 2.50E+07 | >tr A0A1I4UY44 A0A1I4UY44_9PROT | Nitrosomonas nitrosa             | 30S ribosomal protein S7                       | 0         | 161,78 | 8,85E+08 | 11 | 2 | 2 | 26 | 16   | 17,956 | A0A1I4UY44;A0A1H3NRM1;A0A1H3K  | A0A1I4UY44;A0A1H3NRM1;A0A1H3K   | 249                             | -1,45                       | 0,00013 |         |         |
| 4.05E+05 | 3.52E+05 | 0.00E+00 | 5.54E+05 | 4.55E+05 | 9.76E+04 | 0.00E+00 | 0.00E+00 | 2.80E+05 | 2.80E+05 | >tr A0A1G8I86G A0A1G8I86G_9PROT | Nitrosomonas sp. Nm132           | Nitroxyamine dehydrogenase                     | 0         | 10,106 | 1,03E+08 | 9  | 4 | 1 | 12 | 8,2  | 63,762 | A0A1G8I86G;A0A1H3R5V0;A0A1G5D  | A0A1G8I86G;A0A1H3R5V0;A0A1G5D5  | 250                             | 1,41                        | 0,09642 |         |         |
| 8.25E+04 | 1.23E+05 | 1.08E+05 | 1.32E+05 | 7.18E+04 | 1.79E+06 | 1.97E+06 | 1.75E+06 | 2.10E+06 | 1.92E+06 | >tr A0A1G9DRA9 A0A1G9DRA9_9RHOB | Paracoccus chinensis             | Acetyltransferase component of pyruvate dehyd  | 0         | 10,886 | 2,84E+08 | 32 | 1 | 1 | 1  | 4,3  | 47,551 | A0A1G9DRA9                     | A0A1G9DRA9                      | 251                             | -1,50                       | 0,00000 |         |         |
| 0.00E+00 | 0.00E+00 | 0.00E+00 | 0.00E+00 | 0.00E+00 | 8.11E+04 | 9.38E+04 | 8.97E+04 | 8.72E+04 | 0.00E+00 | >tr A0A2H5F242 A0A2H5F242_9RHOB | Paracoccus zhejiangensis         |                                                |           |        |          |    |   |   |    |      |        |                                |                                 |                                 |                             |         |         |         |



|          |          |          |          |          |          |          |          |          |          |                                 |                      |                                                |           |          |          |          |   |   |   |      |        |                                  |                                    |                                    |            |         |         |         |
|----------|----------|----------|----------|----------|----------|----------|----------|----------|----------|---------------------------------|----------------------|------------------------------------------------|-----------|----------|----------|----------|---|---|---|------|--------|----------------------------------|------------------------------------|------------------------------------|------------|---------|---------|---------|
| 1.20E+08 | 1.62E+08 | 1.32E+08 | 1.17E+08 | 1.10E+08 | 6.64E+05 | 4.68E+05 | 2.32E+05 | 3.83E+05 | 6.43E+05 | >tr AOA114LL08 AOA114LL08_9PROT | Nitrosomonas nitrosa | Apoptosis-inducing factor, C-term              | 0         | 19,579   | 7,65E+07 | 7        | 3 | 2 | 3 | 3    | 1      | 11.2                             | 43.74                              | AOA114LL08                         | AOA114LL08 | 327     | -0.55   | 0.00036 |
| 1.35E+07 | 1.58E+07 | 1.23E+07 | 1.55E+07 | 1.68E+07 | 0.00E+00 | 0.00E+00 | 0.00E+00 | 1.05E+05 | 0.00E+00 | >tr AOA114LL47 AOA114LL47_9PROT | Nitrosomonas nitrosa | Dienelactone hydrolase                         | 0         | 28,146   | 9,65E+07 | 9        | 2 | 2 | 2 | 1    | 1      | 13.5                             | 25.78                              | AOA114LL47                         | AOA114LL47 | 328     | 6.51    | 0.34705 |
| 0.00E+00 | 2.88E+05 | 1.01E+05 | 1.55E+05 | 0.00E+00 | 2.64E+05 | 9.41E+04 | 0.00E+00 | 7.94E+04 | 5.32E+04 | >tr AOA114LLU2 AOA114LLU2_9PROT | Nitrosomonas nitrosa | N-acetylneuraminic acid mutarotase             | 0         | 218,64   | 1,90E+08 | 13       | 2 | 2 | 2 | 1    | 1      | 15.5                             | 36,257                             | AOA114LLU2                         | AOA114LLU2 | 329     | 4.20    | 0.05853 |
| 5.71E+04 | 1.02E+05 | 6.94E+04 | 1.12E+05 | 5.49E+04 | 0.00E+00 | 0.00E+00 | 0.00E+00 | 0.00E+00 | 0.00E+00 | >tr AOA114LNV3 AOA114LNV3_9PROT | Nitrosomonas nitrosa | Uncharacterized protein                        | 0         | 9,9485   | 1,68E+07 | 4        | 1 | 1 | 1 | 1    | 1      | 8.1                              | 26,157                             | AOA114LNV3                         | AOA114LNV3 | 330     | #ZAH!   | 0.00000 |
| 1.64E+06 | 2.38E+06 | 1.72E+06 | 1.40E+06 | 1.86E+06 | 1.75E+06 | 1.07E+06 | 7.10E+05 | 1.56E+06 | 1.87E+06 | >tr AOA114LQ74 AOA114LQ74_9PROT | Nitrosomonas nitrosa | Chaperone protein DnaK                         | 0         | 189,7    | 4,75E+08 | 24       | 5 | 1 | 4 | 17   | 11.2   | 70,259                           | AOA114LQ74;AOA113HHP9;AOA113H3E8   | AOA114LQ74;AOA113HHP9;AOA113H3E8   | 331        | -0.08   | 0.00022 |         |
| 1.46E+06 | 1.91E+06 | 1.04E+06 | 1.17E+06 | 1.15E+06 | 0.00E+00 | 0.00E+00 | 0.00E+00 | 0.00E+00 | 2.02E+05 | >tr AOA114LQQ0 AOA114LQQ0_9PROT | Nitrosomonas nitrosa | Glutathione S-transferase                      | 0         | 81,825   | 1,67E+07 | 3        | 1 | 1 | 1 | 1    | 1      | 7.3                              | 23,212                             | AOA114LQQ0                         | AOA114LQQ0 | 332     | 3.23    | #ZAH!   |
| 4.46E+06 | 1.88E+06 | 1.15E+06 | 1.40E+06 | 1.23E+06 | 0.00E+00 | 0.00E+00 | 0.00E+00 | 0.00E+00 | 0.00E+00 | >tr AOA114LY11 AOA114LY11_9PROT | Nitrosomonas nitrosa | Thiazole synthase                              | 0         | 9,8523   | 2,93E+07 | 3        | 1 | 1 | 1 | 1    | 1      | 7.2                              | 28,056                             | AOA114LY11                         | AOA114LY11 | 333     | #ZAH!   | 0.00000 |
| 6.67E+06 | 8.96E+06 | 6.73E+06 | 0.00E+00 | 5.79E+06 | 1.43E+07 | 1.47E+07 | 6.15E+06 | 1.11E+07 | 1.46E+07 | >tr AOA114LY25 AOA114LY25_9PROT | Nitrosomonas nitrosa | Thioredoxin                                    | 0         | 323,31   | 2,91E+09 | 63       | 4 | 4 | 4 | 4    | 14     | 38                               | 12,074                             | AOA114LY25;AOA113K5R3;AOA113H3E8   | AOA114LY25 | 334     | 3.10    | 0.00008 |
| 9.08E+06 | 1.14E+07 | 7.82E+06 | 9.06E+06 | 9.10E+06 | 2.60E+08 | 3.07E+08 | 2.73E+08 | 2.44E+08 | 3.28E+08 | >tr AOA114LZ17 AOA114LZ17_9PROT | Nitrosomonas nitrosa | CHRD domain-containing protein                 | 0         | 32,899   | 1,35E+10 | 15       | 2 | 2 | 2 | 1    | 1      | 21.7                             | 18,734                             | AOA114LZ17                         | AOA114LZ17 | 335     | 0.48    | 0.00000 |
| 1.38E+05 | 1.04E+05 | 8.02E+04 | 0.00E+00 | 0.00E+00 | 0.00E+00 | 0.00E+00 | 0.00E+00 | 2.79E+05 | 2.56E+05 | >tr AOA114M5U7 AOA114M5U7_9PROT | Nitrosomonas nitrosa | Malate dehydrogenase                           | 0         | 20,039   | 9,65E+07 | 6        | 3 | 3 | 3 | 5    | 13.4   | 35,956                           | AOA114M5U7;F8E8A4;AOA112AZM2       | AOA114M5U7                         | 336        | 3.28    | 0.04486 |         |
| 2.54E+08 | 2.99E+08 | 1.87E+08 | 2.58E+08 | 2.86E+08 | 3.24E+05 | 6.42E+04 | 3.89E+04 | 5.88E+05 | 7.25E+05 | >tr AOA114M6F6 AOA114M6F6_9PROT | Nitrosomonas nitrosa | Cytochrome c-type biogenesis protein CcmH      | 0         | 323,31   | 5,15E+08 | 37       | 3 | 3 | 3 | 1    | 9.9    | 48,123                           | AOA114M6F6                         | AOA114M6F6                         | 337        | 3.50    | 0.03488 |         |
| 3.77E+08 | 1.32E+08 | 1.63E+08 | 2.55E+08 | 2.40E+06 | 1.03E+05 | 9.43E+04 | 7.04E+04 | 0.00E+00 | 0.00E+00 | >tr AOA114M38 AOA114M38_9PROT   | Nitrosomonas nitrosa | Phospholipid transport system substrate-bind   | 0,0068611 | 5,9511   | 5,70E+07 | 2        | 1 | 1 | 1 | 1    | 5.8    | 23,43                            | AOA114M38                          | AOA114M38                          | 338        | 3.95    | 0.04457 |         |
| 3.80E+05 | 4.49E+05 | 1.39E+05 | 0.00E+00 | 1.82E+05 | 5.49E+06 | 6.16E+06 | 3.13E+06 | 0.00E+00 | 0.00E+00 | >tr AOA114ME11 AOA114ME11_9PROT | Nitrosomonas nitrosa | Uncharacterized protein                        | 0         | 54,834   | 6,74E+08 | 13       | 1 | 1 | 1 | 1    | 11.9   | 16,928                           | AOA114ME11                         | AOA114ME11                         | 339        | 2.72    | 0.05359 |         |
| 4.37E+06 | 5.35E+06 | 4.62E+06 | 4.28E+06 | 3.70E+06 | 5.71E+06 | 4.12E+06 | 0.00E+00 | 3.15E+06 | 5.19E+06 | >tr AOA114MHK6 AOA114MHK6_9PROT | Nitrosomonas nitrosa | Uncharacterized protein                        | 0         | 14,03    | 1,66E+08 | 2        | 1 | 1 | 1 | 1    | 11.6   | 16,064                           | AOA114MHK6                         | AOA114MHK6                         | 340        | 0.36    | #ZAH!   |         |
| 4.89E+06 | 8.19E+06 | 1.17E+07 | 2.30E+06 | 6.28E+06 | 2.90E+05 | 2.42E+05 | 1.83E+05 | 0.00E+00 | 2.70E+05 | >tr AOA114MNF9 AOA114MNF9_9PROT | Nitrosomonas nitrosa | Cytochrome c, mono- and dihem variants         | 0,0054348 | 6,0422   | 5,08E+07 | 2        | 1 | 1 | 1 | 1    | 2.8    | 47,09                            | AOA114MNF9                         | AOA114MNF9                         | 341        | 0.09    | 0.00558 |         |
| 1.53E+06 | 3.26E+06 | 3.38E+06 | 1.20E+06 | 2.97E+06 | 4.56E+05 | 6.14E+05 | 2.37E+05 | 5.21E+05 | 7.26E+05 | >tr AOA114MQW9 AOA114MQW9_9PROT | Nitrosomonas nitrosa | Uncharacterized protein                        | 0         | 12,737   | 1,66E+08 | 7        | 2 | 2 | 2 | 2    | 13.4   | 22,388                           | AOA114MQW9;AOA113HT57              | AOA114MQW9;AOA113HT57              | 342        | 3.58    | 0.00025 |         |
| 6.66E+06 | 4.00E+06 | 3.12E+06 | 7.74E+06 | 3.03E+06 | 0.00E+00 | 0.00E+00 | 1.29E+05 | 3.62E+05 | 2.49E+05 | >tr AOA114MRP1 AOA114MRP1_9PROT | Nitrosomonas nitrosa | Uncharacterized protein YjbJ, contains pentap  | 0         | 323,31   | 1,55E+08 | 12       | 3 | 3 | 3 | 1    | 18.5   | 27,233                           | AOA114MRP1                         | AOA114MRP1                         | 343        | 4.47    | 0.06973 |         |
| 6.73E+05 | 3.24E+06 | 2.27E+06 | 2.87E+06 | 2.11E+06 | 1.30E+05 | 1.41E+05 | 1.05E+05 | 8.99E+04 | 1.47E+05 | >tr AOA114MZB4 AOA114MZB4_9PROT | Nitrosomonas nitrosa | Putative HEP-CTERM system TPR-repeat lipop     | 0         | 7,2206   | 4,57E+07 | 4        | 1 | 1 | 1 | 1    | 1.4    | 102,42                           | AOA114MZB4                         | AOA114MZB4                         | 344        | -1.47   | 0.00000 |         |
| 0.00E+00 | 0.00E+00 | 0.00E+00 | 0.00E+00 | 6.63E+05 | 2.59E+05 | 2.32E+05 | 3.47E+05 | 2.07E+05 | 0.00E+00 | >tr AOA114N2B1 AOA114N2B1_9PROT | Nitrosomonas nitrosa | 4-HYDROXY-3-METHYLBUT-2-EN-1-YL DIPHOSPHATE    | 0         | 6,574    | 3,16E+07 | 2        | 1 | 1 | 1 | 1    | 3.9    | 44,446                           | AOA114N2B1                         | AOA114N2B1                         | 345        | -1.94   | #ZAH!   |         |
| 9.86E+06 | 1.81E+07 | 1.33E+07 | 1.40E+07 | 4.60E+06 | 0.00E+00 | 0.00E+00 | 9.27E+04 | 0.00E+00 | 0.00E+00 | >tr AOA114N2X8 AOA114N2X8_9PROT | Nitrosomonas nitrosa | Glucokinase                                    | 0         | 19,053   | 3,98E+07 | 5        | 2 | 2 | 2 | 2    | 10.2   | 36,272                           | AOA114N2X8                         | AOA114N2X8                         | 346        | 5.12    | 0.34706 |         |
| 9.16E+05 | 1.44E+06 | 1.65E+06 | 6.86E+05 | 1.19E+06 | 5.24E+05 | 7.17E+05 | 1.29E+05 | 2.58E+05 | 0.00E+00 | >tr AOA114N348 AOA114N348_9PROT | Nitrosomonas nitrosa | Polyketide cyclase / dehydrase and lipid trans | 0         | 34,294   | 3,10E+08 | 11       | 4 | 4 | 4 | 3    | 27.9   | 19,103                           | AOA114N348;AOA113PH93;AOA113H3E8   | AOA114N348                         | 347        | 4.17    | 0.03739 |         |
| 3.81E+07 | 4.37E+07 | 4.04E+07 | 3.70E+07 | 3.62E+07 | 1.83E+05 | 1.83E+05 | 8.95E+04 | 1.69E+05 | 1.78E+05 | >tr AOA114N3B7 AOA114N3B7_9PROT | Nitrosomonas nitrosa | Dimerisation domain-containing protein         | 0,0068143 | 5,9378   | 4,54E+07 | 6        | 1 | 1 | 1 | 1    | 4.9    | 17,7                             | AOA114N3B7                         | AOA114N3B7                         | 348        | 0.75    | #ZAH!   |         |
| 3.57E+06 | 3.42E+06 | 1.65E+06 | 7.72E+05 | 2.37E+06 | 3.32E+05 | 2.53E+05 | 0.00E+00 | 3.20E+05 | 5.42E+05 | >tr AOA114N6P0 AOA114N6P0_9PROT | Nitrosomonas nitrosa | Peptide methionine sulfoxide reductase MsrA    | 0         | 13,632   | 8,58E+07 | 6        | 1 | 1 | 1 | 1    | 8.7    | 25,865                           | AOA114N6P0                         | AOA114N6P0                         | 349        | 2.02    | 0.01050 |         |
| 1.35E+06 | 2.58E+06 | 2.32E+06 | 1.88E+06 | 1.86E+06 | 1.05E+06 | 1.16E+06 | 3.56E+05 | 1.42E+06 | 9.21E+05 | >tr AOA114NDH3 AOA114NDH3_9PROT | Nitrosomonas nitrosa | Reactive intermediate/imine deaminase          | 0         | 323,31   | 6,98E+08 | 18       | 2 | 2 | 2 | 9    | 22.9   | 14,088                           | AOA114NDH3;Q82TN3;QOAF1;AOA114N2B1 | AOA114NDH3;Q82TN3;QOAF1;AOA114N2B1 | 350        | 4.07    | 0.00055 |         |
| 4.60E+06 | 3.66E+06 | 3.45E+06 | 4.61E+06 | 4.85E+06 | 2.19E+06 | 2.83E+06 | 1.09E+06 | 1.99E+06 | 2.47E+06 | >tr AOA114NE55 AOA114NE55_9PROT | Nitrosomonas nitrosa | Uncharacterized protein                        | 0         | 38,082   | 1,77E+08 | 7        | 3 | 3 | 3 | 8    | 19.8   | 25,246                           | AOA114NE55;AOA114SX72;AOA113K5R3   | AOA114NE55                         | 351        | -3.10   | #ZAH!   |         |
| 7.55E+06 | 1.09E+07 | 8.16E+06 | 1.18E+07 | 4.52E+06 | 6.25E+07 | 5.54E+07 | 2.06E+07 | 3.01E+07 | 5.07E+07 | >tr AOA114NHR2 AOA114NHR2_9PROT | Nitrosomonas nitrosa | Bacterial nucleoid protein Hbs                 | 0         | 323,31   | 1,03E+09 | 16       | 2 | 2 | 2 | 4    | 30     | 9,1096                           | AOA114NHR2;AOA113H3E8;AOA113H3E8   | AOA114NHR2;AOA113H3E8;AOA113H3E8   | 352        | -0.83   | 0.00055 |         |
| 1.92E+07 | 2.45E+07 | 2.37E+07 | 1.24E+07 | 1.35E+07 | 1.02E+05 | 4.45E+05 | 0.00E+00 | 0.00E+00 | 0.00E+00 | >tr AOA114NHS8 AOA114NHS8_9PROT | Nitrosomonas nitrosa | Enoyl-[acyl-carrier-protein] reductase [NADH   | 0,0070671 | 6,0074   | 7,20E+07 | 3        | 1 | 1 | 1 | 1    | 5      | 28,063                           | AOA114NHS8                         | AOA114NHS8                         | 353        | 2.75    | 0.23999 |         |
| 1.67E+07 | 2.12E+07 | 1.65E+07 | 2.09E+07 | 1.23E+07 | 0.00E+00 | 3.02E+05 | 0.00E+00 | 0.00E+00 | 0.00E+00 | >tr AOA114NJF2 AOA114NJF2_9PROT | Nitrosomonas nitrosa | Ribose-5-phosphate isomerase A                 | 0         | 27,36    | 1,06E+08 | 7        | 1 | 1 | 1 | 1    | 8.7    | 23,332                           | AOA114NJF2                         | AOA114NJF2                         | 354        | 5.09    | 0.34675 |         |
| 8.07E+05 | 7.79E+05 | 5.02E+05 | 3.95E+05 | 1.23E+05 | 1.07E+05 | 8.73E+04 | 4.31E+04 | 5.65E+04 | 0.00E+00 | >tr AOA114NJN4 AOA114NJN4_9PROT | Nitrosomonas nitrosa | D-alanine--D-alanine ligase                    | 0         | 6,5713   | 1,23E+07 | 1        | 1 | 1 | 1 | 1    | 5.2    | 33,156                           | AOA114NJN4                         | AOA114NJN4                         | 355        | 0.40    | 0.31063 |         |
| 0.00E+00 | 0.00E+00 | 0.00E+00 | 0.00E+00 | 0.00E+00 | 1.21E+06 | 0.00E+00 | 0.00E+00 | 0.00E+00 | 0.00E+00 | >tr AOA114NP32 AOA114NP32_9PROT | Nitrosomonas nitrosa | Thiosulfate sulfurtransferase                  | 0         | 55,062   | 2,16E+08 | 6        | 1 | 1 | 1 | 1    | 12.7   | 16,612                           | AOA114NP32                         | AOA114NP32                         | 356        | 4.23    | #ZAH!   |         |
| 1.69E+07 | 2.30E+07 | 8.44E+06 | 5.03E+06 | 1.55E+07 | 1.93E+05 | 1.18E+05 | 1.55E+05 | 0.00E+00 | 0.00E+00 | >tr AOA114NQJ8 AOA114NQJ8_9PROT | Nitrosomonas nitrosa | Uncharacterized protein                        | 0         | 14,167   | 2,13E+08 | 2        | 2 | 2 | 2 | 2    | 28.2   | 8,8851                           | AOA114NQJ8;AOA113H3E8              | AOA114NQJ8;AOA113H3E8              | 357        | 7.83    | 0.04753 |         |
| 3.94E+05 | 4.41E+05 | 2.72E+05 | 3.84E+05 | 8.08E+05 | 0.00E+00 | 0.00E+00 | 0.00E+00 | 0.00E+00 | 0.00E+00 | >tr AOA114NTE7 AOA114NTE7_9PROT | Nitrosomonas nitrosa | Uncharacterized protein                        | 0         | 152,16   | 8,01E+07 | 3        | 1 | 1 | 1 | 1    | 20.2   | 13,792                           | AOA114NTE7                         | AOA114NTE7                         | 358        | #ZAH!   | #ZAH!   |         |
| 1.18E+06 | 1.27E+06 | 9.39E+05 | 1.20E+06 | 8.00E+05 | 2.14E+05 | 1.38E+05 | 9.18E+04 | 1.61E+05 | 1.95E+05 | >tr AOA114NUJ8 AOA114NUJ8_9PROT | Nitrosomonas nitrosa | Tryptophan--tRNA ligase                        | 0         | 303,6697 | 6,059    | 3,53E+07 | 2 | 1 | 1 | 1    | 3.5    | 45,494                           | AOA114NUJ8                         | AOA114NUJ8                         | 359        | -0.12   | 0.00008 |         |
| 0.00E+00 | 0.00E+00 | 0.00E+00 | 0.00E+00 | 0.00E+00 | 1.29E+06 | 1.82E+05 | 0.00E+00 | 0.00E+00 | 0.00E+00 | >tr AOA114NVP1 AOA114NVP1_9PROT | Nitrosomonas nitrosa | Cytochrome P450                                | 0         | 219,76   | 1,03E+09 | 12       | 4 | 4 | 8 | 29.3 | 19,675 | AOA114NVP1;AOA113H3E8;AOA113H3E8 | AOA114NVP1;AOA113H3E8;AOA113H3E8   | 360                                | 5.96       | 0.27555 |         |         |
| 1.46E+06 | 1.89E+06 | 1.38E+06 | 1.36E+06 | 4.73E+05 | 4.84E+05 | 0.00E+00 | 0.00E+00 | 0.00E+00 | 0.00E+00 | >tr AOA114NW6 AOA114NW6_9PROT   | Nitrosomonas nitrosa | Cytochrome c553                                | 0         | 23,126   | 8,55E+07 | 11       | 1 | 1 | 1 | 1    | 26.4   | 11,604                           | AOA114NW6                          | AOA114NW6                          | 361        | 5.10    | 0.34669 |         |
| 9.88E+05 | 1.25E+06 | 1.53E+06 | 8.59E+05 | 7.42E+05 | 2.07E+06 | 0.00E+00 | 6.80E+05 | 0.00E+00 | 1.06E+06 | >tr AOA114NWU2 AOA114NWU2_9PROT | Nitrosomonas nitrosa | Heat shock protein Hsp20                       | 0         | 7,0554   | 8,00E+07 | 3        | 1 | 1 | 1 | 1    | 11.7   | 16,27                            | AOA114NWU2                         | AOA114NWU2                         | 362        | 0.70    | 0.38568 |         |
| 1.09E+06 | 8.63E+05 | 5.69E+05 | 5.57E+05 | 1.04E+06 | 2.67E+05 | 3.26E+05 | 1.30E+05 | 2.54E+05 | 3.02E+05 | >tr AOA114NY11 AOA114NY11_9PROT | Nitrosomonas nitrosa | Probable cytosol aminopeptidase                | 0         | 12,576   | 4,08E+07 | 5        | 2 | 2 | 2 | 17   | 5.6    | 53,271                           | AOA114NY11;AOA114PHL2;AOA113H3E8   | AOA114NY11;AOA114PHL2;AOA113H3E8   | 363        | -3.33   | #ZAH!   |         |





|          |          |          |          |          |          |          |          |          |          |                                 |                                   |                                              |                           |        |          |          |   |   |   |    |      |        |                              |                               |                                |                                 |         |         |         |
|----------|----------|----------|----------|----------|----------|----------|----------|----------|----------|---------------------------------|-----------------------------------|----------------------------------------------|---------------------------|--------|----------|----------|---|---|---|----|------|--------|------------------------------|-------------------------------|--------------------------------|---------------------------------|---------|---------|---------|
| 1.25E+07 | 1.61E+07 | 6.81E+06 | 1.14E+07 | 6.09E+06 | 0.00E+00 | 0.00E+00 | 0.00E+00 | 0.00E+00 | 0.00E+00 | 0.00E+00                        | >tr A0A1W9J2W1 A0A1W9J2W1_9BACT   | Nitrospira sp. ST-bin5                       | ATP synthase subunit beta | 0      | 315,61   | 0,00E+00 | 0 | 4 | 3 | 0  | 8    | 14,2   | 52,892                       | A0A1W9J2W1:D8PA92;A0A1W9J0    | A0A1W9J2W1:D8PA92;A0A1W9J0Y3;A | 546                             | #ZAH!   | #ZAH!   |         |
| 4.73E+06 | 5.37E+06 | 2.86E+06 | 3.29E+06 | 9.47E+04 | 0.00E+00 | 2.38E+05 | 8.22E+04 | 1.41E+05 | 1.73E+05 | >tr A0A1W9J4N3 A0A1W9J4N3_9BACT | Nitrospira sp. ST-bin5            | Polyribonucleotide nucleotidyltransferase    | 0                         | 6,5647 | 3,92E+07 | 2        | 1 | 1 | 1 | 1  | 1    | 2,1    | 75,756                       | A0A1W9J4N3                    | A0A1W9J4N3                     | 547                             | -0,10   | 0,01391 |         |
| 5.98E+07 | 9.64E+07 | 9.00E+07 | 1.40E+08 | 2.34E+07 | 1.67E+06 | 0.00E+00 | 0.00E+00 | 0.00E+00 | 0.00E+00 | >tr A0A1W9J4X2 A0A1W9J4X2_9BACT | Nitrospira sp. ST-bin5            | Uncharacterized protein                      | 0                         | 7,8913 | 4,72E+08 | 4        | 1 | 1 | 1 | 1  | 1    | 5      | 24,165                       | A0A1W9J4X2                    | A0A1W9J4X2                     | 548                             | 4,37    | 0,34662 |         |
| 3.55E+05 | 6.36E+05 | 3.34E+05 | 3.66E+05 | 2.80E+05 | 1.51E+05 | 1.90E+05 | 7.09E+04 | 1.13E+05 | 1.10E+05 | >tr A0A1W9J589 A0A1W9J589_9BACT | Nitrospira sp. ST-bin5            | Uncharacterized protein                      | 0,0068847                 | 5,9675 | 3,25E+07 | 3        | 1 | 1 | 1 | 1  | 1    | 4,9    | 41,045                       | A0A1W9J589                    | A0A1W9J589                     | 549                             | 0,41    | 0,00024 |         |
| 2.37E+06 | 1.90E+06 | 1.59E+06 | 1.46E+06 | 1.07E+06 | 7.19E+05 | 2.01E+05 | 1.81E+06 | 5.01E+06 | 9.65E+06 | >tr A0A1W9J7A5 A0A1W9J7A5_9BACT | Nitrospira sp. ST-bin5            | Uncharacterized protein                      | 0                         | 15,556 | 2,58E+08 | 9        | 2 | 2 | 2 | 2  | 2    | 6      | 9,4                          | 28,332                        | A0A1W9J7A5;A0A136JQL7;A0A1W    | A0A1W9J7A5;A0A136JQL7;A0A1W9JIB | 550     | -1,52   | 0,08284 |
| 1.65E+06 | 1.75E+06 | 0.00E+00 | 1.66E+06 | 1.45E+06 | 2.86E+07 | 2.66E+07 | 1.36E+07 | 2.24E+07 | 0.43E+07 | >tr A0A1W9J7H6 A0A1W9J7H6_9BACT | Nitrospira sp. ST-bin5            | Uncharacterized protein                      | 0                         | 323,31 | 4,10E+09 | 31       | 3 | 3 | 3 | 3  | 3    | 9      | 23,9                         | 31,737                        | A0A1W9J7H6;D8PI81;A0A1W1HY9    | A0A1W9J7H6;D8PI81;A0A1W1HY9E    | 551     | 1,54    | 0,00002 |
| 3.71E+05 | 0.00E+00 | 2.42E+05 | 2.92E+05 | 1.95E+05 | 0.00E+00 | 0.00E+00 | 0.00E+00 | 0.00E+00 | 0.00E+00 | >tr A0A1X7IY27 A0A1X7IY27_9RHOB | Paracoccus sp. J56                | Predicted oxidoreductase                     | 0                         | 6,2719 | 1,72E+07 | 1        | 1 | 1 | 1 | 1  | 1    | 3,7    | 38,618                       | A0A1X7IY27                    | A0A1X7IY27                     | 552                             | #ZAH!   | 0,00000 |         |
| 1.74E+05 | 2.06E+05 | 1.97E+05 | 2.08E+05 | 3.28E+05 | 2.51E+05 | 2.25E+05 | 1.14E+05 | 1.67E+05 | 2.79E+05 | >tr A0A1X7JG97 A0A1X7JG97_9RHOB | Paracoccus sp. J56                | Amino acid/amide ABC transporter substrate   | 0                         | 8,6633 | 9,52E+07 | 8        | 1 | 1 | 1 | 1  | 1    | 4      | 46,816                       | A0A1X7JG97                    | A0A1X7JG97                     | 553                             | 1,94    | 0,00012 |         |
| 4.18E+05 | 0.00E+00 | 4.59E+05 | 4.16E+05 | 1.41E+05 | 3.57E+06 | 2.89E+06 | 3.65E+06 | 4.15E+06 | 4.18E+06 | >tr A0A1X7JIS3 A0A1X7JIS3_9RHOB | Paracoccus sp. J56                | ATP synthase subunit beta                    | 0                         | 46,947 | 6,08E+08 | 24       | 3 | 1 | 1 | 2  | 11,4 | 50,233 | A0A1X7JIS3;A0A1G7BKN2        | A0A1X7JIS3;A0A1G7BKN2         | 554                            | -1,00                           | 0,00000 |         |         |
| 1.22E+06 | 1.12E+06 | 0.00E+00 | 7.27E+05 | 0.00E+00 | 0.00E+00 | 0.00E+00 | 0.00E+00 | 0.00E+00 | 0.00E+00 | >tr A0A238VVT1 A0A238VVT1_9RHOB | Paracoccus sediminis              | Isocitrate dehydrogenase [NADP]              | 0                         | 29,264 | 0,00E+00 | 0        | 2 | 2 | 0 | 0  | 1    | 6,9    | 45,389                       | A0A238VVT1                    | A0A238VVT1                     | 555                             | #ZAH!   | #ZAH!   |         |
| 0.00E+00 | >tr A0A238W710 A0A238W710_9RHOB | Paracoccus sediminis              | Polysaccharide pyruvyl transferase           | 0,0069808                 | 5,9919 | 1,28E+07 | 1        | 1 | 1 | 1 | 1  | 1    | 3,1    | 42,402                       | A0A238W710                    | A0A238W710                     | 556                             | #ZAH!   | #ZAH!   |         |
| 2.69E+05 | 3.93E+05 | 1.64E+05 | 3.16E+05 | 0.00E+00 | 7.39E+05 | 0.00E+00 | 9.81E+04 | 2.92E+05 | 2.64E+05 | >tr A0A239PMM6 A0A239PMM6_9RHOB | Paracoccus seriniphilus           | Catalase-peroxidase                          | 0                         | 15,288 | 2,09E+08 | 7        | 1 | 1 | 1 | 2  | 2    | 2      | 81,232                       | A0A239PMM6;SSY589             | A0A239PMM6;SSY589              | 557                             | 1,77    | 0,05961 |         |
| 1.95E+06 | 2.20E+06 | 2.12E+06 | 3.39E+06 | 2.94E+06 | 1.98E+06 | 2.14E+06 | 1.67E+06 | 1.28E+06 | 0.00E+00 | >tr A0A256WYH8 A0A256WYH8_9BACT | Nitrospira sp. UW-LDO-01          | Uncharacterized protein                      | 0,0069444                 | 5,9864 | 5,27E+08 | 2        | 1 | 1 | 1 | 1  | 1    | 2,6    | 67,688                       | A0A256WYH8                    | A0A256WYH8                     | 558                             | 0,49    | 0,00604 |         |
| 2.55E+05 | 2.32E+05 | 1.20E+05 | 0.00E+00 | 1.64E+05 | 2.08E+05 | 2.69E+05 | 5.94E+04 | 1.57E+05 | 1.53E+05 | >tr A0A2A2GGF7 A0A2A2GGF7_9RHOB | Paracoccus sp. WN007              | Microcin ABC transporter ATP-binding protein | 0                         | 6,4295 | 6,99E+07 | 3        | 1 | 1 | 1 | 1  | 1    | 2,3    | 55,892                       | A0A2A2GGF7                    | A0A2A2GGF7                     | 559                             | 1,04    | 0,00120 |         |
| 0.00E+00 | 0.00E+00 | 0.00E+00 | 0.00E+00 | 0.00E+00 | 7.59E+06 | 7.40E+06 | 4.59E+06 | 6.25E+06 | 6.71E+06 | >tr A0A2H5EWY1 A0A2H5EWY1_9RHOB | Paracoccus zhejiangensis          | 60 kDa chaperonin                            | 0                         | 323,31 | 1,69E+09 | 27       | 7 | 3 | 2 | 34 | 15,3 | 57,771 | A0A2H5EWY1;A0A2A2GHN6;Q9Z4   | A0A2H5EWY1;A0A2A2GHN6;Q9Z4G2; | 560                            | -0,57                           | 0,00000 |         |         |
| 5.21E+05 | 6.26E+05 | 4.60E+05 | 6.22E+05 | 6.09E+05 | 0.00E+00 | 0.00E+00 | 0.00E+00 | 0.00E+00 | 0.00E+00 | >tr A0A2A2GM46 A0A2A2GM46_9RHOB | Paracoccus sp. WN007              | Chromosome segregation protein SMC (Fragm    | 0                         | 6,3871 | 2,49E+07 | 2        | 1 | 1 | 1 | 1  | 1    | 1,8    | 91,458                       | A0A2A2GM46                    | A0A2A2GM46                     | 561                             | #ZAH!   | #ZAH!   |         |
| 0.00E+00 | 1.34E+06 | 0.00E+00 | 1.45E+05 | >tr A0A2D2C7H2 A0A2D2C7H2_9RHOB | Paracoccus sp. Yee01              | Sugar ABC transporter substrate-binding prot | 0                         | 7,0761 | 5,33E+07 | 1        | 1 | 1 | 1 | 1  | 1    | 5,6    | 53,048                       | A0A2D2C7H2                    | A0A2D2C7H2                     | 562                             | #ZAH!   | #ZAH!   |         |
| 0.00E+00 | 0.00E+00 | 0.00E+00 | 3.41E+04 | 4.42E+04 | 0.00E+00 | 1.15E+06 | 0.00E+00 | 5.59E+05 | 8.70E+05 | >tr A0A2E3CFP5 A0A2E3CFP5_9RHOB | Paracoccus sp.                    | PQQ-dependent dehydrogenase, methanol/et     | 0                         | 6,2631 | 1,24E+08 | 4        | 1 | 1 | 1 | 1  | 2    | 2,1    | 67,305                       | A0A2E3CFP5;A0A2D8X0A6         | A0A2E3CFP5;A0A2D8X0A6          | 563                             | -0,37   | 0,05573 |         |
| 1.10E+06 | 1.49E+06 | 1.29E+06 | 1.11E+06 | 1.19E+06 | 3.94E+05 | 1.37E+05 | 2.96E+05 | 1.10E+05 | 0.00E+00 | >tr A0A2E3CEI5 A0A2E3CEI5_9RHOB | Paracoccus sp.                    | Malate dehydrogenase                         | 0,0018553                 | 6,0847 | 2,00E+08 | 4        | 2 | 1 | 1 | 1  | 2    | 7,8    | 33,469                       | A0A2E3CEI5;A0A2D8X362         | A0A2E3CEI5;A0A2D8X362          | 564                             | 3,28    | 0,02818 |         |
| 1.80E+05 | 1.21E+05 | 6.82E+04 | 1.67E+05 | 1.23E+05 | 4.49E+05 | 5.82E+05 | 0.00E+00 | 0.00E+00 | 0.00E+00 | >tr A0A2G1YZ09 A0A2G1YZ09_9RHOB | Paracoccus sp.                    | ATP synthase subunit beta                    | 0                         | 17,755 | 7,90E+07 | 3        | 4 | 2 | 2 | 2  | 2    | 13,1   | 50,448                       | A0A2G1YZ09;A0A1N7MME2         | A0A2G1YZ09;A0A1N7MME2          | 565                             | 1,22    | 0,14592 |         |
| 4.31E+05 | 6.60E+05 | 6.14E+05 | 4.14E+05 | 3.65E+05 | 0.00E+00 | 0.00E+00 | 0.00E+00 | 0.00E+00 | 0.00E+00 | >tr A0A2G1Z1D0 A0A2G1Z1D0_9RHOB | Paracoccus sp.                    | Chaperone protein DnaK                       | 0                         | 22,931 | 0,00E+00 | 0        | 4 | 1 | 0 | 1  | 6,4  | 68,667 | A0A2G1Z1D0                   | A0A2G1Z1D0                    | 566                            | #ZAH!                           | #ZAH!   |         |         |
| 0.00E+00 | 0.00E+00 | 0.00E+00 | 0.00E+00 | 0.00E+00 | 1.61E+07 | 1.89E+07 | 9.05E+06 | 1.35E+07 | 1.65E+07 | >tr A0A2G1Z4R4 A0A2G1Z4R4_9RHOB | Paracoccus sp.                    | Transcriptional regulator                    | 0                         | 11,233 | 8,19E+08 | 3        | 2 | 2 | 2 | 41 | 19,6 | 12,255 | A0A2G1Z4R4;SSXRT9;Q3SRC8;Q1C | A0A2G1Z4R4;SSXRT9;Q3SRC8;Q1C  | 567                            | -0,25                           | 0,00002 |         |         |
| 8.49E+05 | 8.11E+05 | 6.66E+05 | 5.18E+05 | 6.43E+05 | 0.00E+00 | 6.57E+05 | 2.87E+05 | 6.22E+05 | 4.81E+05 | >tr A0A2H5EV53 A0A2H5EV53_9RHOB | Paracoccus zhejiangensis          | ATP synthase subunit alpha                   | 0                         | 64,235 | 6,17E+07 | 5        | 3 | 1 | 1 | 1  | 1    | 8,2    | 55,151                       | A0A2H5EV53                    | A0A2H5EV53                     | 568                             | -3,69   | #ZAH!   |         |
| 8.09E+05 | 1.32E+06 | 8.73E+05 | 1.87E+06 | 1.38E+06 | 2.61E+05 | 3.48E+05 | 0.00E+00 | 8.58E+04 | 2.99E+05 | >tr A0A2H5EY37 A0A2H5EY37_9RHOB | Paracoccus zhejiangensis          | Uncharacterized protein                      | 0,0018762                 | 6,1022 | 3,35E+08 | 1        | 1 | 1 | 1 | 1  | 1    | 0,8    | 146,73                       | A0A2H5EY37                    | A0A2H5EY37                     | 569                             | 1,96    | #ZAH!   |         |
| 5.83E+05 | 1.47E+06 | 1.00E+06 | 7.98E+05 | 5.00E+05 | 3.06E+05 | 2.28E+05 | 0.00E+00 | 1.69E+05 | 2.05E+05 | >tr A0A2H5F1J9 A0A2H5F1J9_9RHOB | Paracoccus zhejiangensis          | ABC transporter substrate-binding protein    | 0                         | 10,689 | 4,46E+07 | 5        | 1 | 1 | 1 | 1  | 1    | 4,4    | 39,318                       | A0A2H5F1J9                    | A0A2H5F1J9                     | 570                             | 1,19    | 0,00713 |         |
| 1.03E+05 | 1.59E+05 | 0.00E+00 | 9.13E+04 | 6.88E+04 | 8.28E+05 | 1.01E+06 | 6.46E+05 | 7.76E+05 | 9.43E+05 | >tr A0A2H5F246 A0A2H5F246_9RHOB | Paracoccus zhejiangensis          | Formate dehydrogenase                        | 0                         | 12,264 | 9,77E+08 | 5        | 2 | 2 | 2 | 2  | 2    | 2,6    | 109,92                       | A0A2H5F246;A0A1N7JPA7         | A0A2H5F246;A0A1N7JPA7          | 571                             | 1,94    | 0,00000 |         |
| 3.31E+05 | 7.79E+05 | 8.30E+05 | 3.21E+05 | 0.00E+00 | 8.23E+06 | 6.07E+06 | 3.77E+06 | 8.24E+06 | 8.72E+06 | >tr Q1QHY1 Q1QHY1_NITXH         | Nitrobacter hamburgensis (strain  | Cold-shock DNA-binding protein family        | 0                         | 35,698 | 1,24E+09 | 8        | 1 | 1 | 1 | 1  | 2    | 15,9   | 7,3892                       | Q1QHY1;A3WV12                 | Q1QHY1;A3WV12                  | 572                             | 2,98    | 0,00007 |         |
| 4.99E+05 | 1.13E+06 | 6.73E+05 | 6.63E+05 | 2.54E+05 | 1.87E+07 | 1.24E+07 | 1.17E+07 | 1.30E+07 | 1.65E+07 | >tr A3X1N0 A3X1N0_9BRAD         | Nitrobacter sp. Nb-311A           | Uncharacterized protein                      | 0                         | 6,3386 | 1,93E+09 | 4        | 1 | 1 | 1 | 1  | 1    | 5,4    | 34,228                       | A3X1N0                        | A3X1N0                         | 573                             | 0,29    | #ZAH!   |         |
| 8.17E+05 | 1.11E+06 | 6.75E+05 | 0.00E+00 | 9.01E+05 | 6.27E+05 | 1.06E+06 | 0.00E+00 | 6.33E+05 | 1.33E+06 | >sp B1XXY8 CH10_LEPCP           | Leptothrix cholodnii (strain ATCC | 10 kDa chaperonin                            | 0                         | 9,7547 | 5,05E+07 | 5        | 1 | 1 | 1 | 1  | 1    | 28,1   | 10,459                       | B1XXY8                        | B1XXY8                         | 574                             | 0,39    | 0,01208 |         |
| 3.18E+07 | 3.38E+07 | 2.34E+07 | 2.53E+07 | 1.39E+07 | 2.38E+05 | 1.98E+04 | 0.00E+00 | 6.61E+05 | 2.13E+06 | >sp B1XXY9 CH60_LEPCP           | Leptothrix cholodnii (strain ATCC | 60 kDa chaperonin                            | 0                         | 64,601 | 2,97E+08 | 7        | 8 | 5 | 3 | 1  | 16,4 | 57,309 | B1XXY9                       | B1XXY9                        | 575                            | 1,17                            | 0,16419 |         |         |
| 2.24E+06 | 2.74E+06 | 2.36E+06 | 2.37E+06 | 1.53E+06 | 2.02E+06 | 1.98E+06 | 2.19E+06 | 2.49E+06 | 3.11E+06 | >tr I4Z6D7 I4Z6D7_9BURK         | Leptothrix ochracea L12           | Isocitrate lyase                             | 0                         | 53,262 | 1,97E+09 | 13       | 1 | 1 | 2 | 2  | 2    | 7,7    | 47,793                       | I4Z6D7;B1XY22                 | I4Z6D7;B1XY22                  | 576                             | 2,00    | 0,00000 |         |
| 1.48E+05 | 1.60E+05 | 1.30E+05 | 1.49E+05 | 1.40E+05 | 2.23E+05 | 4.36E+05 | 1.08E+05 | 2.29E+05 | 3.78E+05 | >tr B1XZV7 B1XZV7_LEPCP         | Leptothrix cholodnii (strain ATCC | Aldehyde ferredoxin oxidoreductase           | 0                         | 6,3299 | 8,48E+07 | 4        | 1 | 1 | 1 | 1  | 1    | 2,3    | 65,907                       | B1XZV7                        | B1XZV7                         | 577                             | 0,27    | 0,00162 |         |
| 2.69E+06 | 3.60E+05 | 1.16E+06 | 2.06E+06 | 1.45E+06 | 0.00E+00 | 0.00E+00 | 0.00E+00 | 0.00E+00 | 0.00E+00 | >tr B1Y042 B1Y042_LEPCP         | Leptothrix cholodnii (strain ATCC | Acetyl-coenzyme A synthetase                 | 0                         | 6,2361 | 0,00E+00 | 2        | 1 | 1 | 1 | 1  | 1    | 1,8    | 71,191                       | B1Y042                        | B1Y042                         | 578                             | #ZAH!   | #ZAH!   |         |
| 1.82E+06 | 1.72E+06 | 1.40E+06 | 2.01E+06 | 1.28E+06 | 2.08E+06 | 1.94E+06 | 1.61E+06 | 1.22E+06 | 0.00E+00 | >tr B1Y0Z0 B1Y0Z0_LEPCP         | Leptothrix cholodnii (strain ATCC | Formaldehyde-activating enzyme               | 0,0071048                 | 6,0128 | 9,86E+07 | 2        | 1 | 1 | 1 | 1  | 1    | 6,5    | 17,691                       | B1Y0Z0                        | B1Y0Z0                         | 579                             | -0,32   | #ZAH!   |         |
| 2.69E+06 | 2.67E+06 | 2.31E+06 | 3.03E+06 | 0.00E+00 | 4.54E+05 | 3.34E+05 | 3.74E+05 | 4.02E+05 | 0.00E+00 | >tr I4Z5U7 I4Z5U7_9BURK         | Leptothrix ochracea L12           | Acetoacetyl-CoA reductase                    | 0                         | 7,6798 | 1,72E+07 | 1        | 1 | 1 | 1 | 2  | 7,3  | 26,11  | I4Z5U7;B1Y253                | I4Z5U7;B1Y253                 | 580                            | #ZAH!                           | #ZAH!   |         |         |
| 0.00E+00 | 0.00E+00 | 0.00E+00 | 0.00E+00 | 0.00E+00 | 7.83E+04 | 1.11E+05 | 4.68E+04 | 0.00E+00 | 0.00E+00 | >tr B1Y3S7 B1Y3S7_LEPCP         | Leptothrix cholodnii (strain ATCC | ATP synthase subunit beta                    | 0                         | 8,1473 | 8,38E+07 | 8        | 3 | 1 | 1 | 1  | 1    | 9,3    | 51,219                       | B1Y3S7                        | B1Y3S7                         | 581                             | 3,78    | 0,06241 |         |
| 1.55E+07 | 1.67E+07 | 1.53E+07 | 1.61E+07 | 9.50E+06 | 1.62E+06 | 2.66E+06 | 1.26E+06 | 0.00E+00 | 1.13E+05 | >sp B1Y3S9 ATPA_LEPCP           | Leptothrix cholodnii (strain ATCC | ATP synthase subunit alpha                   | 0                         | 16,    |          |          |   |   |   |    |      |        |                              |                               |                                |                                 |         |         |         |
